# Supplementary material for: An extended π-system and enhanced electronic delocalization on symmetric [Ru3O(CH3COO)6(L)3]ncomplexes combined with azanaphthalene ligands
Source: Royal Society of Chemistry journal article supplement (doi:10.1039/c7dt01152k), 2017-01-01
Supplement: c7dt01152k1.pdf [file c7dt01152k1.pdf]

## Electronic Supplementary Information for

### Extended $\pi$ -system and enhanced electronic delocalization on symmetric [Ru<sub>3</sub>O(CH<sub>3</sub>COO)<sub>6</sub>(L)<sub>3</sub>]<sup>n</sup> complexes combined to azanahthalene ligands

Bruna Possato<sup>[a]</sup>, Victor Marcelo Deflon<sup>[b]</sup>, Zeki Naal<sup>[c]</sup>, André Luiz Barboza  
Formiga<sup>[d]\*</sup> and Sofia Nikolaou<sup>[a]\*</sup>

*[a] Departamento de Química – Faculdade de Filosofia, Ciências e Letras de Ribeirão Preto -  
Universidade de São Paulo – Av. Bandeirantes, 3900, ZIP CODE 14040-901 – Ribeirão Preto – SP . –  
Brasil. Phone 55 16 33153748*

*[b] Departamento de Química e Física Molecular - Instituto de Química de São Carlos - Universidade de  
São Paulo - Av. Trabalhador São Carlense, 400, Centro – ZIP CODE 13566-590 - São Carlos – SP -  
Brasil.*

*[c] Faculdade de Ciências Farmacêuticas de Ribeirão Preto - Universidade de São Paulo – Av. do Café  
s/ n° - ZIP CODE 14040-903 – Ribeirão Preto – SP - Brasil.*

*[d] Instituto de Química – Universidade Estadual de Campinas – P.O.BOX 6154 – ZIP CODE 13083-  
970 – Campinas – SP – Brasil.*

\*Authors for correspondence: sofia@ffclrp.usp.br; formiga@iqm.unicamp.br

*X-ray diffraction*

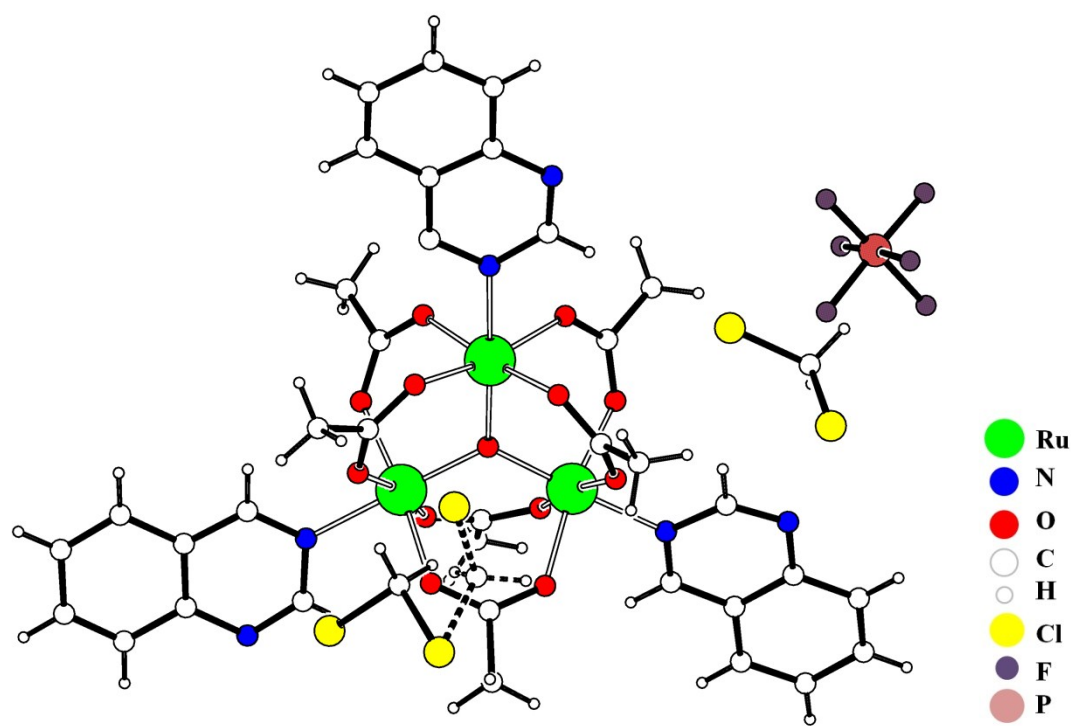

**Figure S1.** Resolved structure of complex 1 with solvent disorder.

**Table S1.** Crystal data and structure refinement for mo\_snquinaz\_0m.

|                                   |                                             |                               |
|-----------------------------------|---------------------------------------------|-------------------------------|
| Identification code               | shelx                                       |                               |
| Empirical formula                 | C38 H40 Cl4 F6 N6 O13 P Ru3                 |                               |
| Formula weight                    | 1378.74                                     |                               |
| Temperature                       | 296(2) K                                    |                               |
| Wavelength                        | 0.71073 Å                                   |                               |
| Crystal system                    | Monoclinic                                  |                               |
| Space group                       | C c                                         |                               |
| Unit cell dimensions              | a = 10.4495(2) Å                            | $\alpha = 90^\circ$ .         |
|                                   | b = 22.0539(5) Å                            | $\beta = 94.5290(10)^\circ$ . |
|                                   | c = 21.9358(4) Å                            | $\gamma = 90^\circ$ .         |
| Volume                            | 5039.37(18) Å <sup>3</sup>                  |                               |
| Z                                 | 4                                           |                               |
| Density (calculated)              | 1.817 Mg/m <sup>3</sup>                     |                               |
| Absorption coefficient            | 1.219 mm <sup>-1</sup>                      |                               |
| F(000)                            | 2732                                        |                               |
| Crystal size                      | 0.120 x 0.120 x 0.120 mm <sup>3</sup>       |                               |
| Theta range for data collection   | 1.847 to 25.079°.                           |                               |
| Index ranges                      | -11 ≤ h ≤ 12, -26 ≤ k ≤ 21, -26 ≤ l ≤ 20    |                               |
| Reflections collected             | 15553                                       |                               |
| Independent reflections           | 6520 [R(int) = 0.0159]                      |                               |
| Completeness to theta = 25.079°   | 100.0 %                                     |                               |
| Absorption correction             | Semi-empirical from equivalents             |                               |
| Max. and min. transmission        | 0.7452 and 0.7077                           |                               |
| Refinement method                 | Full-matrix least-squares on F <sup>2</sup> |                               |
| Data / restraints / parameters    | 6520 / 8 / 648                              |                               |
| Goodness-of-fit on F <sup>2</sup> | 1.087                                       |                               |
| Final R indices [I > 2σ(I)]       | R1 = 0.0300, wR2 = 0.0808                   |                               |
| R indices (all data)              | R1 = 0.0310, wR2 = 0.0818                   |                               |
| Absolute structure parameter      | 0.47(4)                                     |                               |
| Extinction coefficient            | n/a                                         |                               |
| Largest diff. peak and hole       | 1.204 and -0.668 e.Å <sup>-3</sup>          |                               |

**Table S2.** Atomic coordinates (  $\times 10^4$ ) and equivalent isotropic displacement parameters ( $\text{\AA}^2 \times 10^3$ ) for mo\_squinaz\_0m.  $U(\text{eq})$  is defined as one third of the trace of the orthogonalized  $U^{ij}$  tensor.

|        |          |          |          |       |
|--------|----------|----------|----------|-------|
| C(1)   | 6663(8)  | 503(3)   | 1292(3)  | 36(2) |
| C(2)   | 7783(10) | 251(5)   | 991(4)   | 66(3) |
| C(3)   | 3155(8)  | 207(3)   | 1429(4)  | 37(2) |
| C(4)   | 2202(11) | -249(4)  | 1218(5)  | 69(3) |
| C(5)   | 6265(7)  | 2450(3)  | 1506(3)  | 36(2) |
| C(6)   | 7321(10) | 2827(5)  | 1280(5)  | 61(3) |
| C(7)   | 2606(7)  | 2312(3)  | 1613(3)  | 35(2) |
| C(8)   | 1409(10) | 2675(5)  | 1473(4)  | 63(3) |
| C(9)   | 6948(8)  | 1338(3)  | 3245(4)  | 37(2) |
| C(10)  | 8036(11) | 1348(4)  | 3729(5)  | 65(3) |
| C(11)  | 5978(7)  | -350(3)  | 3425(3)  | 34(2) |
| C(11A) | 3323(7)  | 1117(3)  | 3226(3)  | 35(2) |
| C(12)  | 6306(7)  | -915(3)  | 3691(3)  | 36(2) |
| C(12A) | 2216(9)  | 1020(4)  | 3609(4)  | 54(2) |
| C(13)  | 6576(8)  | -990(4)  | 4329(4)  | 47(2) |
| C(14)  | 6872(9)  | -1558(5) | 4554(4)  | 53(2) |
| C(15)  | 6905(9)  | -2054(4) | 4145(5)  | 54(2) |
| C(16)  | 6643(9)  | -1991(3) | 3542(4)  | 49(2) |
| C(17)  | 6334(8)  | -1418(3) | 3296(4)  | 40(2) |
| C(18)  | 5768(8)  | -811(3)  | 2476(3)  | 38(2) |
| C(21)  | 5033(8)  | 2750(3)  | 3734(3)  | 36(2) |
| C(22)  | 5082(8)  | 3268(4)  | 4122(3)  | 39(2) |
| C(23)  | 5427(9)  | 3229(5)  | 4767(4)  | 53(2) |
| C(24)  | 5530(11) | 3724(5)  | 5102(5)  | 69(3) |
| C(25)  | 5257(11) | 4297(5)  | 4825(5)  | 72(3) |
| C(26)  | 4921(10) | 4358(4)  | 4218(5)  | 60(3) |
| C(27)  | 4844(8)  | 3824(4)  | 3843(4)  | 44(2) |
| C(28)  | 4516(8)  | 3376(4)  | 2915(4)  | 40(2) |
| C(31)  | 3765(7)  | 1029(3)  | -134(3)  | 32(2) |
| C(32)  | 3401(7)  | 1112(3)  | -757(3)  | 32(2) |
| C(33)  | 3143(8)  | 626(4)   | -1169(4) | 41(2) |
| C(34)  | 2821(8)  | 748(4)   | -1774(4) | 46(2) |
| C(35)  | 2742(9)  | 1343(4)  | -1981(4) | 47(2) |
| C(36)  | 2982(8)  | 1821(4)  | -1593(3) | 43(2) |
| C(37)  | 3314(7)  | 1711(3)  | -968(3)  | 35(2) |
| C(38)  | 3897(9)  | 2045(3)  | -15(4)   | 43(2) |
| N(11)  | 5697(6)  | -296(3)  | 2826(3)  | 33(1) |
| N(12)  | 6065(7)  | -1351(3) | 2677(3)  | 41(2) |
| N(21)  | 4753(6)  | 2810(3)  | 3137(3)  | 31(1) |
| N(22)  | 4533(7)  | 3869(3)  | 3235(3)  | 44(2) |
| N(31)  | 4004(6)  | 1485(3)  | 240(3)   | 30(1) |
| N(32)  | 3573(7)  | 2188(3)  | -576(3)  | 43(2) |
| O(1)   | 6550(5)  | 338(2)   | 1832(2)  | 42(1) |
| O(2)   | 5940(6)  | 845(2)   | 974(2)   | 43(1) |
| O(3)   | 3829(6)  | 86(2)    | 1910(2)  | 42(1) |

|        |          |          |          |        |
|--------|----------|----------|----------|--------|
| O(4)   | 3206(6)  | 680(2)   | 1116(2)  | 43(1)  |
| O(5)   | 5711(6)  | 2096(2)  | 1123(2)  | 43(1)  |
| O(6)   | 5996(5)  | 2518(2)  | 2053(2)  | 41(1)  |
| O(7)   | 2912(6)  | 1944(3)  | 1228(2)  | 44(1)  |
| O(8)   | 3225(5)  | 2427(2)  | 2120(2)  | 39(1)  |
| O(9)   | 6363(5)  | 1828(2)  | 3126(2)  | 43(1)  |
| O(10)  | 6664(6)  | 837(2)   | 3008(3)  | 44(1)  |
| O(11)  | 3576(5)  | 1664(2)  | 3121(2)  | 39(1)  |
| O(12)  | 3883(6)  | 657(2)   | 3051(2)  | 39(1)  |
| O(13)  | 4821(4)  | 1326(2)  | 2053(2)  | 25(1)  |
| F(1)   | 5301(14) | 9159(8)  | 698(4)   | 207(7) |
| F(2)   | 5028(11) | 8819(6)  | -653(5)  | 147(4) |
| F(3)   | 4031(14) | 9450(5)  | -86(5)   | 180(6) |
| F(4)   | 6180(11) | 8480(6)  | 128(5)   | 153(4) |
| F(5)   | 6187(15) | 9411(6)  | -118(6)  | 175(5) |
| F(6)   | 4123(12) | 8527(5)  | 157(8)   | 199(7) |
| P(1)   | 5091(4)  | 8977(1)  | 33(1)    | 75(1)  |
| RU1    | 5209(1)  | 550(1)   | 2422(1)  | 27(1)  |
| RU2    | 4796(1)  | 2045(1)  | 2563(1)  | 26(1)  |
| RU3    | 4461(1)  | 1393(1)  | 1187(1)  | 27(1)  |
| C(1S)  | 9147(15) | 1219(6)  | 5315(7)  | 93(4)  |
| CL1S   | 9276(4)  | 1367(2)  | 6087(2)  | 108(1) |
| CL2S   | 10517(4) | 1207(3)  | 4982(2)  | 131(2) |
| CL3S   | 5836(11) | 3962(6)  | 6930(6)  | 280(5) |
| CL4A   | 4515(17) | 3047(6)  | 7536(8)  | 192(4) |
| C(2SA) | 4210(40) | 3581(18) | 6940(20) | 192(4) |
| CL4B   | 4418(16) | 4861(6)  | 7612(7)  | 192(4) |
| C(2SB) | 4530(40) | 4047(16) | 7430(20) | 192(4) |

---

**Table S3.** Bond lengths [Å] and angles [°] for mo\_snquinaz\_0m.

---

|               |           |
|---------------|-----------|
| C(1)-O(2)     | 1.241(9)  |
| C(1)-O(1)     | 1.253(9)  |
| C(1)-C(2)     | 1.497(12) |
| C(2)-H(2A)    | 0.9600    |
| C(2)-H(2B)    | 0.9600    |
| C(2)-H(2C)    | 0.9600    |
| C(3)-O(3)     | 1.249(9)  |
| C(3)-O(4)     | 1.253(9)  |
| C(3)-C(4)     | 1.465(11) |
| C(4)-H(4A)    | 0.9600    |
| C(4)-H(4B)    | 0.9600    |
| C(4)-H(4C)    | 0.9600    |
| C(5)-O(5)     | 1.255(9)  |
| C(5)-O(6)     | 1.263(9)  |
| C(5)-C(6)     | 1.497(12) |
| C(6)-H(6A)    | 0.9600    |
| C(6)-H(6B)    | 0.9600    |
| C(6)-H(6C)    | 0.9600    |
| C(7)-O(7)     | 1.231(9)  |
| C(7)-O(8)     | 1.267(8)  |
| C(7)-C(8)     | 1.497(11) |
| C(8)-H(8A)    | 0.9600    |
| C(8)-H(8B)    | 0.9600    |
| C(8)-H(8C)    | 0.9600    |
| C(9)-O(10)    | 1.246(9)  |
| C(9)-O(9)     | 1.259(9)  |
| C(9)-C(10)    | 1.493(11) |
| C(10)-H(10A)  | 0.9600    |
| C(10)-H(10B)  | 0.9600    |
| C(10)-H(10C)  | 0.9600    |
| C(11)-N(11)   | 1.327(9)  |
| C(11)-C(12)   | 1.407(10) |
| C(11)-H(11)   | 0.9300    |
| C(11A)-O(12)  | 1.248(9)  |
| C(11A)-O(11)  | 1.259(9)  |
| C(11A)-C(12A) | 1.498(11) |
| C(12)-C(17)   | 1.409(11) |
| C(12)-C(13)   | 1.416(11) |
| C(12A)-H(12A) | 0.9600    |
| C(12A)-H(12B) | 0.9600    |
| C(12A)-H(12C) | 0.9600    |
| C(13)-C(14)   | 1.374(13) |
| C(13)-H(13)   | 0.9300    |
| C(14)-C(15)   | 1.416(14) |
| C(14)-H(14)   | 0.9300    |
| C(15)-C(16)   | 1.337(13) |
| C(15)-H(15)   | 0.9300    |
| C(16)-C(17)   | 1.402(11) |

|             |           |
|-------------|-----------|
| C(16)-H(16) | 0.9300    |
| C(17)-N(12) | 1.372(11) |
| C(18)-N(12) | 1.300(9)  |
| C(18)-N(11) | 1.375(9)  |
| C(18)-H(18) | 0.9300    |
| C(21)-N(21) | 1.325(9)  |
| C(21)-C(22) | 1.424(10) |
| C(21)-H(21) | 0.9300    |
| C(22)-C(27) | 1.384(12) |
| C(22)-C(23) | 1.433(12) |
| C(23)-C(24) | 1.316(14) |
| C(23)-H(23) | 0.9300    |
| C(24)-C(25) | 1.422(17) |
| C(24)-H(24) | 0.9300    |
| C(25)-C(26) | 1.356(16) |
| C(25)-H(25) | 0.9300    |
| C(26)-C(27) | 1.435(11) |
| C(26)-H(26) | 0.9300    |
| C(27)-N(22) | 1.353(11) |
| C(28)-N(22) | 1.294(10) |
| C(28)-N(21) | 1.354(10) |
| C(28)-H(28) | 0.9300    |
| C(31)-N(31) | 1.309(9)  |
| C(31)-C(32) | 1.402(10) |
| C(31)-H(31) | 0.9300    |
| C(32)-C(37) | 1.401(10) |
| C(32)-C(33) | 1.414(10) |
| C(33)-C(34) | 1.369(11) |
| C(33)-H(33) | 0.9300    |
| C(34)-C(35) | 1.388(12) |
| C(34)-H(34) | 0.9300    |
| C(35)-C(36) | 1.365(12) |
| C(35)-H(35) | 0.9300    |
| C(36)-C(37) | 1.409(10) |
| C(36)-H(36) | 0.9300    |
| C(37)-N(32) | 1.373(10) |
| C(38)-N(32) | 1.290(10) |
| C(38)-N(31) | 1.355(9)  |
| C(38)-H(38) | 0.9300    |
| N(11)-RU1   | 2.112(6)  |
| N(21)-RU2   | 2.109(5)  |
| N(31)-RU3   | 2.106(6)  |
| O(1)-RU1    | 2.034(6)  |
| O(2)-RU3    | 2.044(5)  |
| O(3)-RU1    | 2.032(5)  |
| O(4)-RU3    | 2.044(5)  |
| O(5)-RU3    | 2.039(5)  |
| O(6)-RU2    | 2.032(5)  |
| O(7)-RU3    | 2.033(5)  |
| O(8)-RU2    | 2.024(5)  |

|                  |           |
|------------------|-----------|
| O(9)-RU2         | 2.029(5)  |
| O(10)-RU1        | 2.016(5)  |
| O(11)-RU2        | 2.020(5)  |
| O(12)-RU1        | 2.045(6)  |
| O(13)-RU3        | 1.912(4)  |
| O(13)-RU1        | 1.923(4)  |
| O(13)-RU2        | 1.941(4)  |
| F(1)-P(1)        | 1.512(10) |
| F(2)-P(1)        | 1.540(10) |
| F(3)-P(1)        | 1.528(10) |
| F(4)-P(1)        | 1.582(10) |
| F(5)-P(1)        | 1.548(13) |
| F(6)-P(1)        | 1.458(11) |
| C(1S)-CL2S       | 1.657(16) |
| C(1S)-CL1S       | 1.719(15) |
| C(1S)-H(1S1)     | 0.9700    |
| C(1S)-H(1S2)     | 0.9700    |
| CL3S-C(2SB)      | 1.83(3)   |
| CL3S-C(2SA)      | 1.90(3)   |
| CL4Aa-C(2SA)     | 1.77(3)   |
| C(2SAa)-H(2S1)   | 0.9700    |
| C(2SAa)-H(2S2)   | 0.9700    |
| CL4Bb-C(2SB)     | 1.85(3)   |
| C(2SBb)-H(2S3)   | 0.9700    |
| C(2SBb)-H(2S4)   | 0.9700    |
| O(2)-C(1)-O(1)   | 127.5(7)  |
| O(2)-C(1)-C(2)   | 116.0(7)  |
| O(1)-C(1)-C(2)   | 116.4(7)  |
| C(1)-C(2)-H(2A)  | 109.5     |
| C(1)-C(2)-H(2B)  | 109.5     |
| H(2A)-C(2)-H(2B) | 109.5     |
| C(1)-C(2)-H(2C)  | 109.5     |
| H(2A)-C(2)-H(2C) | 109.5     |
| H(2B)-C(2)-H(2C) | 109.5     |
| O(3)-C(3)-O(4)   | 126.5(7)  |
| O(3)-C(3)-C(4)   | 116.5(7)  |
| O(4)-C(3)-C(4)   | 117.1(7)  |
| C(3)-C(4)-H(4A)  | 109.5     |
| C(3)-C(4)-H(4B)  | 109.5     |
| H(4A)-C(4)-H(4B) | 109.5     |
| C(3)-C(4)-H(4C)  | 109.5     |
| H(4A)-C(4)-H(4C) | 109.5     |
| H(4B)-C(4)-H(4C) | 109.5     |
| O(5)-C(5)-O(6)   | 125.8(7)  |
| O(5)-C(5)-C(6)   | 115.9(7)  |
| O(6)-C(5)-C(6)   | 118.3(7)  |
| C(5)-C(6)-H(6A)  | 109.5     |
| C(5)-C(6)-H(6B)  | 109.5     |
| H(6A)-C(6)-H(6B) | 109.5     |



|                      |          |
|----------------------|----------|
| C(5)-C(6)-H(6C)      | 109.5    |
| H(6A)-C(6)-H(6C)     | 109.5    |
| H(6B)-C(6)-H(6C)     | 109.5    |
| O(7)-C(7)-O(8)       | 126.3(7) |
| O(7)-C(7)-C(8)       | 118.1(6) |
| O(8)-C(7)-C(8)       | 115.6(7) |
| C(7)-C(8)-H(8A)      | 109.5    |
| C(7)-C(8)-H(8B)      | 109.5    |
| H(8A)-C(8)-H(8B)     | 109.5    |
| C(7)-C(8)-H(8C)      | 109.5    |
| H(8A)-C(8)-H(8C)     | 109.5    |
| H(8B)-C(8)-H(8C)     | 109.5    |
| O(10)-C(9)-O(9)      | 125.3(7) |
| O(10)-C(9)-C(10)     | 116.9(7) |
| O(9)-C(9)-C(10)      | 117.7(7) |
| C(9)-C(10)-H(10A)    | 109.5    |
| C(9)-C(10)-H(10B)    | 109.5    |
| H(10A)-C(10)-H(10B)  | 109.5    |
| C(9)-C(10)-H(10C)    | 109.5    |
| H(10A)-C(10)-H(10C)  | 109.5    |
| H(10B)-C(10)-H(10C)  | 109.5    |
| N(11)-C(11)-C(12)    | 121.1(7) |
| N(11)-C(11)-H(11)    | 119.5    |
| C(12)-C(11)-H(11)    | 119.5    |
| O(12)-C(11A)-O(11)   | 127.7(7) |
| O(12)-C(11A)-C(12A)  | 117.3(7) |
| O(11)-C(11A)-C(12A)  | 115.0(7) |
| C(11)-C(12)-C(17)    | 117.3(7) |
| C(11)-C(12)-C(13)    | 122.4(7) |
| C(17)-C(12)-C(13)    | 120.3(7) |
| C(11A)-C(12A)-H(12A) | 109.5    |
| C(11A)-C(12A)-H(12B) | 109.5    |
| H(12A)-C(12A)-H(12B) | 109.5    |
| C(11A)-C(12A)-H(12C) | 109.5    |
| H(12A)-C(12A)-H(12C) | 109.5    |
| H(12B)-C(12A)-H(12C) | 109.5    |
| C(14)-C(13)-C(12)    | 118.9(8) |
| C(14)-C(13)-H(13)    | 120.6    |
| C(12)-C(13)-H(13)    | 120.6    |
| C(13)-C(14)-C(15)    | 119.6(8) |
| C(13)-C(14)-H(14)    | 120.2    |
| C(15)-C(14)-H(14)    | 120.2    |
| C(16)-C(15)-C(14)    | 122.1(7) |
| C(16)-C(15)-H(15)    | 118.9    |
| C(14)-C(15)-H(15)    | 118.9    |
| C(15)-C(16)-C(17)    | 119.9(8) |
| C(15)-C(16)-H(16)    | 120.0    |
| C(17)-C(16)-H(16)    | 120.0    |
| N(12)-C(17)-C(16)    | 120.1(7) |
| N(12)-C(17)-C(12)    | 120.7(7) |

|                   |           |
|-------------------|-----------|
| C(16)-C(17)-C(12) | 119.2(8)  |
| N(12)-C(18)-N(11) | 126.1(7)  |
| N(12)-C(18)-H(18) | 117.0     |
| N(11)-C(18)-H(18) | 117.0     |
| N(21)-C(21)-C(22) | 120.3(7)  |
| N(21)-C(21)-H(21) | 119.9     |
| C(22)-C(21)-H(21) | 119.9     |
| C(27)-C(22)-C(21) | 116.7(7)  |
| C(27)-C(22)-C(23) | 120.7(7)  |
| C(21)-C(22)-C(23) | 122.5(8)  |
| C(24)-C(23)-C(22) | 120.3(10) |
| C(24)-C(23)-H(23) | 119.8     |
| C(22)-C(23)-H(23) | 119.8     |
| C(23)-C(24)-C(25) | 119.6(10) |
| C(23)-C(24)-H(24) | 120.2     |
| C(25)-C(24)-H(24) | 120.2     |
| C(26)-C(25)-C(24) | 122.3(9)  |
| C(26)-C(25)-H(25) | 118.8     |
| C(24)-C(25)-H(25) | 118.8     |
| C(25)-C(26)-C(27) | 118.6(10) |
| C(25)-C(26)-H(26) | 120.7     |
| C(27)-C(26)-H(26) | 120.7     |
| N(22)-C(27)-C(22) | 121.5(7)  |
| N(22)-C(27)-C(26) | 120.2(8)  |
| C(22)-C(27)-C(26) | 118.3(8)  |
| N(22)-C(28)-N(21) | 125.9(7)  |
| N(22)-C(28)-H(28) | 117.1     |
| N(21)-C(28)-H(28) | 117.1     |
| N(31)-C(31)-C(32) | 122.4(6)  |
| N(31)-C(31)-H(31) | 118.8     |
| C(32)-C(31)-H(31) | 118.8     |
| C(37)-C(32)-C(31) | 116.8(6)  |
| C(37)-C(32)-C(33) | 119.9(6)  |
| C(31)-C(32)-C(33) | 123.3(7)  |
| C(34)-C(33)-C(32) | 119.3(7)  |
| C(34)-C(33)-H(33) | 120.3     |
| C(32)-C(33)-H(33) | 120.3     |
| C(33)-C(34)-C(35) | 120.5(7)  |
| C(33)-C(34)-H(34) | 119.8     |
| C(35)-C(34)-H(34) | 119.8     |
| C(36)-C(35)-C(34) | 121.6(7)  |
| C(36)-C(35)-H(35) | 119.2     |
| C(34)-C(35)-H(35) | 119.2     |
| C(35)-C(36)-C(37) | 119.4(7)  |
| C(35)-C(36)-H(36) | 120.3     |
| C(37)-C(36)-H(36) | 120.3     |
| N(32)-C(37)-C(32) | 120.7(6)  |
| N(32)-C(37)-C(36) | 120.0(7)  |
| C(32)-C(37)-C(36) | 119.3(7)  |
| N(32)-C(38)-N(31) | 128.5(7)  |

|                   |           |
|-------------------|-----------|
| N(32)-C(38)-H(38) | 115.7     |
| N(31)-C(38)-H(38) | 115.7     |
| C(11)-N(11)-C(18) | 117.5(6)  |
| C(11)-N(11)-RU1   | 121.4(5)  |
| C(18)-N(11)-RU1   | 121.1(5)  |
| C(18)-N(12)-C(17) | 117.3(6)  |
| C(21)-N(21)-C(28) | 117.9(6)  |
| C(21)-N(21)-RU2   | 119.7(5)  |
| C(28)-N(21)-RU2   | 122.3(5)  |
| C(28)-N(22)-C(27) | 117.6(7)  |
| C(31)-N(31)-C(38) | 115.9(6)  |
| C(31)-N(31)-RU3   | 124.1(5)  |
| C(38)-N(31)-RU3   | 120.0(5)  |
| C(38)-N(32)-C(37) | 115.8(6)  |
| C(1)-O(1)-RU1     | 130.9(5)  |
| C(1)-O(2)-RU3     | 131.8(5)  |
| C(3)-O(3)-RU1     | 133.4(5)  |
| C(3)-O(4)-RU3     | 130.8(5)  |
| C(5)-O(5)-RU3     | 133.7(5)  |
| C(5)-O(6)-RU2     | 130.9(5)  |
| C(7)-O(7)-RU3     | 132.5(5)  |
| C(7)-O(8)-RU2     | 132.5(5)  |
| C(9)-O(9)-RU2     | 133.2(5)  |
| C(9)-O(10)-RU1    | 133.4(5)  |
| C(11A)-O(11)-RU2  | 131.4(5)  |
| C(11A)-O(12)-RU1  | 131.3(5)  |
| RU3-O(13)-RU1     | 120.2(2)  |
| RU3-O(13)-RU2     | 119.9(2)  |
| RU1-O(13)-RU2     | 119.8(2)  |
| F(6)-P(1)-F(1)    | 92.8(10)  |
| F(6)-P(1)-F(3)    | 89.6(8)   |
| F(1)-P(1)-F(3)    | 91.8(8)   |
| F(6)-P(1)-F(2)    | 92.9(9)   |
| F(1)-P(1)-F(2)    | 173.7(8)  |
| F(3)-P(1)-F(2)    | 90.8(6)   |
| F(6)-P(1)-F(5)    | 175.2(8)  |
| F(1)-P(1)-F(5)    | 89.4(8)   |
| F(3)-P(1)-F(5)    | 94.6(8)   |
| F(2)-P(1)-F(5)    | 84.7(7)   |
| F(6)-P(1)-F(4)    | 90.3(7)   |
| F(1)-P(1)-F(4)    | 90.4(8)   |
| F(3)-P(1)-F(4)    | 177.7(7)  |
| F(2)-P(1)-F(4)    | 87.0(6)   |
| F(5)-P(1)-F(4)    | 85.4(8)   |
| O(13)-RU1-O(10)   | 96.41(19) |
| O(13)-RU1-O(3)    | 95.70(19) |
| O(10)-RU1-O(3)    | 167.9(2)  |
| O(13)-RU1-O(1)    | 94.0(2)   |
| O(10)-RU1-O(1)    | 87.4(2)   |
| O(3)-RU1-O(1)     | 91.6(2)   |

|                      |           |
|----------------------|-----------|
| O(13)-RU1-O(12)      | 92.9(2)   |
| O(10)-RU1-O(12)      | 92.9(2)   |
| O(3)-RU1-O(12)       | 86.7(2)   |
| O(1)-RU1-O(12)       | 173.0(2)  |
| O(13)-RU1-N(11)      | 178.2(2)  |
| O(10)-RU1-N(11)      | 82.2(2)   |
| O(3)-RU1-N(11)       | 85.7(2)   |
| O(1)-RU1-N(11)       | 84.8(2)   |
| O(12)-RU1-N(11)      | 88.4(2)   |
| O(13)-RU2-O(11)      | 92.7(2)   |
| O(13)-RU2-O(8)       | 96.38(19) |
| O(11)-RU2-O(8)       | 86.5(2)   |
| O(13)-RU2-O(9)       | 96.32(19) |
| O(11)-RU2-O(9)       | 92.8(2)   |
| O(8)-RU2-O(9)        | 167.3(2)  |
| O(13)-RU2-O(6)       | 93.8(2)   |
| O(11)-RU2-O(6)       | 173.5(2)  |
| O(8)-RU2-O(6)        | 92.0(2)   |
| O(9)-RU2-O(6)        | 87.3(2)   |
| O(13)-RU2-N(21)      | 178.3(2)  |
| O(11)-RU2-N(21)      | 85.8(2)   |
| O(8)-RU2-N(21)       | 84.2(2)   |
| O(9)-RU2-N(21)       | 83.1(2)   |
| O(6)-RU2-N(21)       | 87.8(2)   |
| O(13)-RU3-O(7)       | 95.6(2)   |
| O(13)-RU3-O(5)       | 92.87(19) |
| O(7)-RU3-O(5)        | 93.7(2)   |
| O(13)-RU3-O(2)       | 95.1(2)   |
| O(7)-RU3-O(2)        | 169.3(2)  |
| O(5)-RU3-O(2)        | 86.2(2)   |
| O(13)-RU3-O(4)       | 95.28(19) |
| O(7)-RU3-O(4)        | 87.4(3)   |
| O(5)-RU3-O(4)        | 171.6(2)  |
| O(2)-RU3-O(4)        | 91.2(2)   |
| O(13)-RU3-N(31)      | 177.8(2)  |
| O(7)-RU3-N(31)       | 82.3(2)   |
| O(5)-RU3-N(31)       | 87.4(2)   |
| O(2)-RU3-N(31)       | 87.0(2)   |
| O(4)-RU3-N(31)       | 84.5(2)   |
| CL2S-C(1S)-CL1S      | 115.7(8)  |
| CL2S-C(1S)-H(1S1)    | 108.3     |
| CL1S-C(1S)-H(1S1)    | 108.3     |
| CL2S-C(1S)-H(1S2)    | 108.3     |
| CL1S-C(1S)-H(1S2)    | 108.3     |
| H(1S1)-C(1S)-H(1S2)  | 107.4     |
| CL4Aa-C(2SAa)-CL3S   | 101(2)    |
| CL4Aa-C(2SAa)-H(2S1) | 111.5     |
| CL3S-C(2SAa)-H(2S1)  | 111.5     |
| CL4Aa-C(2SAa)-H(2S2) | 111.5     |
| CL3S-C(2SAa)-H(2S2)  | 111.5     |

H(2S1a)-C(2SAa)-H(2S2)109.4  
CL3S-C(2SBb)-CL4B 107(2)  
CL3S-C(2SBb)-H(2S3) 110.3  
CL4Bb-C(2SBb)-H(2S3) 110.3  
CL3S-C(2SBb)-H(2S4) 110.3  
CL4Bb-C(2SBb)-H(2S4) 110.3  
H(2S3b)-C(2SBb)-H(2S4)108.6

**Table S4.** Anisotropic displacement parameters ( $\text{\AA}^2 \times 10^3$ ) for mo\_snquinaz\_0m. The anisotropic displacement factor exponent takes the form:  $-2\pi^2 [h^2 a^{*2} U^{11} + \dots + 2 h k a^* b^* U^{12}]$

|        | U11   | U22   | U33   | U23    | U13    | U12    |
|--------|-------|-------|-------|--------|--------|--------|
| C(1)   | 39(4) | 34(4) | 35(4) | -5(3)  | 6(3)   | 2(3)   |
| C(2)   | 64(6) | 92(8) | 44(5) | 5(5)   | 22(5)  | 30(6)  |
| C(3)   | 38(4) | 36(4) | 37(4) | -2(3)  | 1(3)   | -8(3)  |
| C(4)   | 92(8) | 59(6) | 52(6) | 13(5)  | -27(5) | -40(6) |
| C(5)   | 35(4) | 38(4) | 33(4) | 2(3)   | 2(3)   | -3(3)  |
| C(6)   | 70(7) | 63(6) | 53(6) | 4(5)   | 11(5)  | -32(5) |
| C(7)   | 32(4) | 37(4) | 34(4) | 0(3)   | -3(3)  | 2(3)   |
| C(8)   | 61(6) | 83(7) | 42(5) | -16(5) | -16(4) | 43(6)  |
| C(9)   | 39(4) | 35(4) | 35(4) | 1(3)   | -8(3)  | 1(3)   |
| C(10)  | 70(7) | 54(6) | 64(6) | -10(4) | -39(6) | 12(5)  |
| C(11)  | 39(4) | 26(4) | 37(4) | 0(3)   | 5(3)   | 0(3)   |
| C(11A) | 32(4) | 37(4) | 34(4) | 2(3)   | 2(3)   | -1(3)  |
| C(12)  | 37(4) | 36(4) | 35(4) | 4(3)   | 5(3)   | 2(3)   |
| C(12A) | 59(6) | 55(5) | 53(5) | 3(4)   | 27(4)  | -4(4)  |
| C(13)  | 46(5) | 55(5) | 42(5) | 5(4)   | 8(4)   | 8(4)   |
| C(14)  | 48(5) | 66(6) | 44(5) | 23(4)  | 2(4)   | 8(4)   |
| C(15)  | 56(6) | 40(5) | 67(6) | 26(4)  | 11(5)  | 8(4)   |
| C(16)  | 59(6) | 28(4) | 61(6) | 8(4)   | 5(4)   | 5(4)   |
| C(17)  | 44(5) | 31(4) | 47(5) | 2(3)   | 7(4)   | 4(3)   |
| C(18)  | 48(5) | 31(4) | 34(4) | 7(3)   | 4(3)   | 5(3)   |
| C(21)  | 40(4) | 32(4) | 35(4) | -4(3)  | 0(3)   | 0(3)   |
| C(22)  | 40(4) | 43(4) | 34(4) | -17(3) | 5(3)   | -3(4)  |
| C(23)  | 52(5) | 69(6) | 38(5) | -6(4)  | 2(4)   | -1(5)  |
| C(24)  | 69(7) | 91(8) | 46(6) | -28(5) | 1(5)   | -2(6)  |
| C(25)  | 68(7) | 81(7) | 66(7) | -46(6) | 3(5)   | -7(6)  |
| C(26)  | 56(6) | 43(5) | 80(7) | -29(5) | 10(5)  | -4(4)  |
| C(27)  | 34(4) | 44(4) | 53(5) | -21(4) | 4(4)   | 3(4)   |
| C(28)  | 41(5) | 41(4) | 39(4) | -8(3)  | -2(3)  | 0(4)   |
| C(31)  | 43(4) | 25(3) | 29(4) | 1(3)   | 0(3)   | 3(3)   |
| C(32)  | 35(4) | 34(4) | 26(4) | -1(3)  | 1(3)   | 4(3)   |
| C(33)  | 53(5) | 37(4) | 33(4) | -9(3)  | -4(4)  | 4(4)   |
| C(34)  | 48(5) | 53(5) | 35(4) | -10(4) | -2(3)  | 11(4)  |
| C(35)  | 53(5) | 67(6) | 20(4) | 0(3)   | 0(3)   | 15(4)  |
| C(36)  | 54(5) | 43(4) | 32(4) | 8(3)   | 0(3)   | 16(4)  |
| C(37)  | 39(4) | 37(4) | 27(4) | -3(3)  | 3(3)   | 13(3)  |
| C(38)  | 64(6) | 26(4) | 37(5) | -7(3)  | -8(4)  | 6(4)   |
| N(11)  | 46(4) | 23(3) | 29(3) | -1(2)  | 5(3)   | 3(3)   |
| N(12)  | 55(4) | 32(3) | 37(4) | -2(3)  | 7(3)   | 4(3)   |
| N(21)  | 39(4) | 26(3) | 28(3) | -6(2)  | 0(3)   | 1(3)   |
| N(22)  | 47(4) | 26(3) | 57(4) | -6(3)  | -2(3)  | 0(3)   |
| N(31)  | 41(4) | 24(3) | 27(3) | -2(2)  | 6(3)   | 5(3)   |
| N(32)  | 65(5) | 33(3) | 32(3) | 3(3)   | 6(3)   | 9(3)   |
| O(1)   | 47(3) | 42(3) | 38(3) | 4(2)   | 11(3)  | 14(3)  |

|        |         |         |         |        |         |         |
|--------|---------|---------|---------|--------|---------|---------|
| O(2)   | 52(3)   | 49(3)   | 29(3)   | -1(2)  | 9(2)    | 21(3)   |
| O(3)   | 55(4)   | 35(3)   | 35(3)   | 0(2)   | -8(2)   | -11(3)  |
| O(4)   | 59(4)   | 35(3)   | 31(3)   | 5(2)   | -11(2)  | -15(3)  |
| O(5)   | 57(4)   | 42(3)   | 30(3)   | 0(2)   | 5(2)    | -18(3)  |
| O(6)   | 50(3)   | 39(3)   | 36(3)   | -5(2)  | 11(2)   | -19(3)  |
| O(7)   | 53(4)   | 50(3)   | 28(3)   | -10(2) | -7(2)   | 20(3)   |
| O(8)   | 40(3)   | 42(3)   | 35(3)   | -12(2) | -10(2)  | 13(2)   |
| O(9)   | 49(3)   | 37(3)   | 41(3)   | -11(2) | -17(3)  | 5(3)    |
| O(10)  | 54(3)   | 28(3)   | 46(3)   | -6(2)  | -14(3)  | 4(2)    |
| O(11)  | 52(3)   | 27(3)   | 42(3)   | -4(2)  | 18(2)   | -4(2)   |
| O(12)  | 53(3)   | 28(3)   | 38(3)   | 4(2)   | 14(2)   | 3(2)    |
| O(13)  | 29(3)   | 21(2)   | 24(2)   | 0(2)   | 2(2)    | 1(2)    |
| F(1)   | 252(17) | 292(17) | 68(6)   | -42(8) | -35(8)  | 13(13)  |
| F(2)   | 137(9)  | 209(11) | 90(6)   | -31(7) | -20(6)  | 48(8)   |
| F(3)   | 257(16) | 133(9)  | 140(9)  | -17(7) | -39(10) | 108(10) |
| F(4)   | 116(8)  | 198(11) | 144(9)  | 63(8)  | 8(7)    | 48(8)   |
| F(5)   | 208(14) | 156(10) | 162(12) | 9(8)   | 21(10)  | -67(10) |
| F(6)   | 129(10) | 131(9)  | 340(20) | 58(10) | 63(11)  | -36(8)  |
| P(1)   | 93(2)   | 70(2)   | 59(2)   | 9(1)   | -12(2)  | 8(2)    |
| RU1    | 34(1)   | 23(1)   | 23(1)   | -1(1)  | 2(1)    | 0(1)    |
| RU2    | 32(1)   | 23(1)   | 23(1)   | -3(1)  | 0(1)    | 0(1)    |
| RU3    | 35(1)   | 24(1)   | 21(1)   | -2(1)  | 2(1)    | 0(1)    |
| C(1S)  | 95(10)  | 79(8)   | 102(10) | -21(7) | -12(8)  | -6(7)   |
| CL1S   | 109(3)  | 122(3)  | 95(3)   | -31(2) | 20(2)   | -26(2)  |
| CL2S   | 100(3)  | 209(5)  | 84(3)   | 16(3)  | 8(2)    | 26(3)   |
| CL3S   | 202(9)  | 356(13) | 289(13) | 70(11) | 69(8)   | -16(10) |
| CL4A   | 218(11) | 169(7)  | 186(8)  | -12(6) | 4(8)    | -28(7)  |
| C(2SA) | 218(11) | 169(7)  | 186(8)  | -12(6) | 4(8)    | -28(7)  |
| CL4B   | 218(11) | 169(7)  | 186(8)  | -12(6) | 4(8)    | -28(7)  |
| C(2SB) | 218(11) | 169(7)  | 186(8)  | -12(6) | 4(8)    | -28(7)  |

---

**Table S5.** Hydrogen bonds for mo\_snquinaz\_0m [ $\text{\AA}$  and  $^\circ$ ].

| D-H...A                       | d(D-H) | d(H...A) | d(D...A)  | <(DHA) |
|-------------------------------|--------|----------|-----------|--------|
| C(6)-H(6C)...CL2S\$1#1        | 0.96   | 2.97     | 3.919(12) | 170.8  |
| C(8)-H(8A)...F4\$2#2          | 0.96   | 2.52     | 3.436(14) | 160.3  |
| C(8)-H(8B)...N12\$3#3         | 0.96   | 2.50     | 3.445(11) | 167.8  |
| C(10)-H(10C)...CL4Aa\$4#40.96 |        | 2.66     | 3.41(2)   | 136.2  |
| C(12A)-H(12A)...F3\$5#5       | 0.96   | 2.55     | 3.466(15) | 159.1  |
| C(31)-H(31)...F3\$6#6         | 0.93   | 2.64     | 3.494(12) | 153.8  |
| C(38)-H(38)...O(5)            | 0.93   | 2.53     | 3.014(9)  | 112.6  |
| C(1S)-H(1S2)...F4\$5#5        | 0.97   | 2.53     | 3.17(2)   | 123.5  |

Symmetry transformations used to generate equivalent atoms:

#1  $x-1/2, -y+1/2, z-1/2$  #2  $x-1/2, y-1/2, z$  #3  $x-1/2, y+1/2, z$   
 #4  $x+1/2, -y+1/2, z-1/2$  #5  $x, -y+1, z+1/2$  #6  $x, y-1, z$

Distance X..Y

3.3434 (0.0007) \_ RU1 - RU2  
 3.3252 (0.0007) \_ RU1 - RU3  
 3.3360 (0.0007) \_ RU2 - RU3

Angle ANG

59.71 ( 0.01) \_ RU1 - RU2 - RU3  
 60.25 ( 0.02) \_ RU2 - RU3 - RU1  
 60.03 ( 0.01) \_ RU3 - RU1 - RU2

Least-squares planes (x,y,z in crystal coordinates) and deviations from them  
 (\* indicates atom used to define plane)

$10.2780 (0.0005) x + 3.2162 (0.0051) y - 4.0266 (0.0053) z = 4.5551 (0.0018)$

\* 0.0000 (0.0012) RU1  
 \* 0.0000 (0.0012) RU2  
 \* 0.0000 (0.0012) RU3  
 \* -0.0001 (0.0035) O13

Rms deviation of fitted atoms = 0.0001

$10.2222 (0.0038) x + 3.9114 (0.0482) y - 4.0476 (0.0429) z = 4.5804 (0.0145)$

Angle to previous plane (with approximate esd) = 1.834 ( 0.074 )

\* 0.0070 (0.0064) C11  
 \* 0.0136 (0.0074) C12  
 \* 0.0023 (0.0071) C13  
 \* -0.0088 (0.0072) C14



- \* -0.0037 (0.0078) C15
- \* -0.0028 (0.0077) C16
- \* 0.0053 (0.0080) C17
- \* -0.0032 (0.0066) C18
- \* -0.0169 (0.0058) N11
- \* 0.0071 (0.0064) N12

Rms deviation of fitted atoms = 0.0084

$$10.2780 (0.0005) x + 3.2162 (0.0051) y - 4.0266 (0.0053) z = 4.5551 (0.0018)$$

Angle to previous plane (with approximate esd) = 1.834 ( 0.074 )

- \* 0.0000 (0.0012) RU1
- \* 0.0000 (0.0012) RU2
- \* 0.0000 (0.0012) RU3
- \* -0.0001 (0.0035) O13

Rms deviation of fitted atoms = 0.0001

$$10.2705 (0.0049) x + 2.2280 (0.0571) y - 5.0729 (0.0422) z = 3.8915 (0.0210)$$

Angle to previous plane (with approximate esd) = 3.759 ( 0.089 )

- \* -0.0034 (0.0067) C21
- \* -0.0354 (0.0076) C22
- \* -0.0165 (0.0078) C23
- \* 0.0293 (0.0091) C24
- \* 0.0174 (0.0090) C25
- \* -0.0067 (0.0080) C26
- \* -0.0146 (0.0080) C27
- \* 0.0198 (0.0064) C28
- \* 0.0248 (0.0059) N21
- \* -0.0147 (0.0065) N22

Rms deviation of fitted atoms = 0.0204

$$10.2780 (0.0005) x + 3.2162 (0.0051) y - 4.0266 (0.0053) z = 4.5551 (0.0018)$$

Angle to previous plane (with approximate esd) = 3.759 ( 0.089 )

- \* 0.0000 (0.0012) RU1
- \* 0.0000 (0.0012) RU2
- \* 0.0000 (0.0012) RU3
- \* -0.0001 (0.0035) O13

Rms deviation of fitted atoms = 0.0001

10.2593 (0.0032) x - 0.6096 (0.0557) y - 5.8099 (0.0355) z = 3.8724 (0.0091)

Angle to previous plane (with approximate esd) = 11.004 ( 0.066 )

\* 0.0048 (0.0065) C31  
\* -0.0112 (0.0070) C32  
\* -0.0063 (0.0071) C33  
\* 0.0062 (0.0072) C34  
\* 0.0100 (0.0072) C35  
\* 0.0014 (0.0073) C36  
\* -0.0139 (0.0074) C37  
\* 0.0094 (0.0079) C38  
\* 0.0053 (0.0059) N31  
\* -0.0057 (0.0067) N32

Rms deviation of fitted atoms = 0.0082

*DFT calculations*

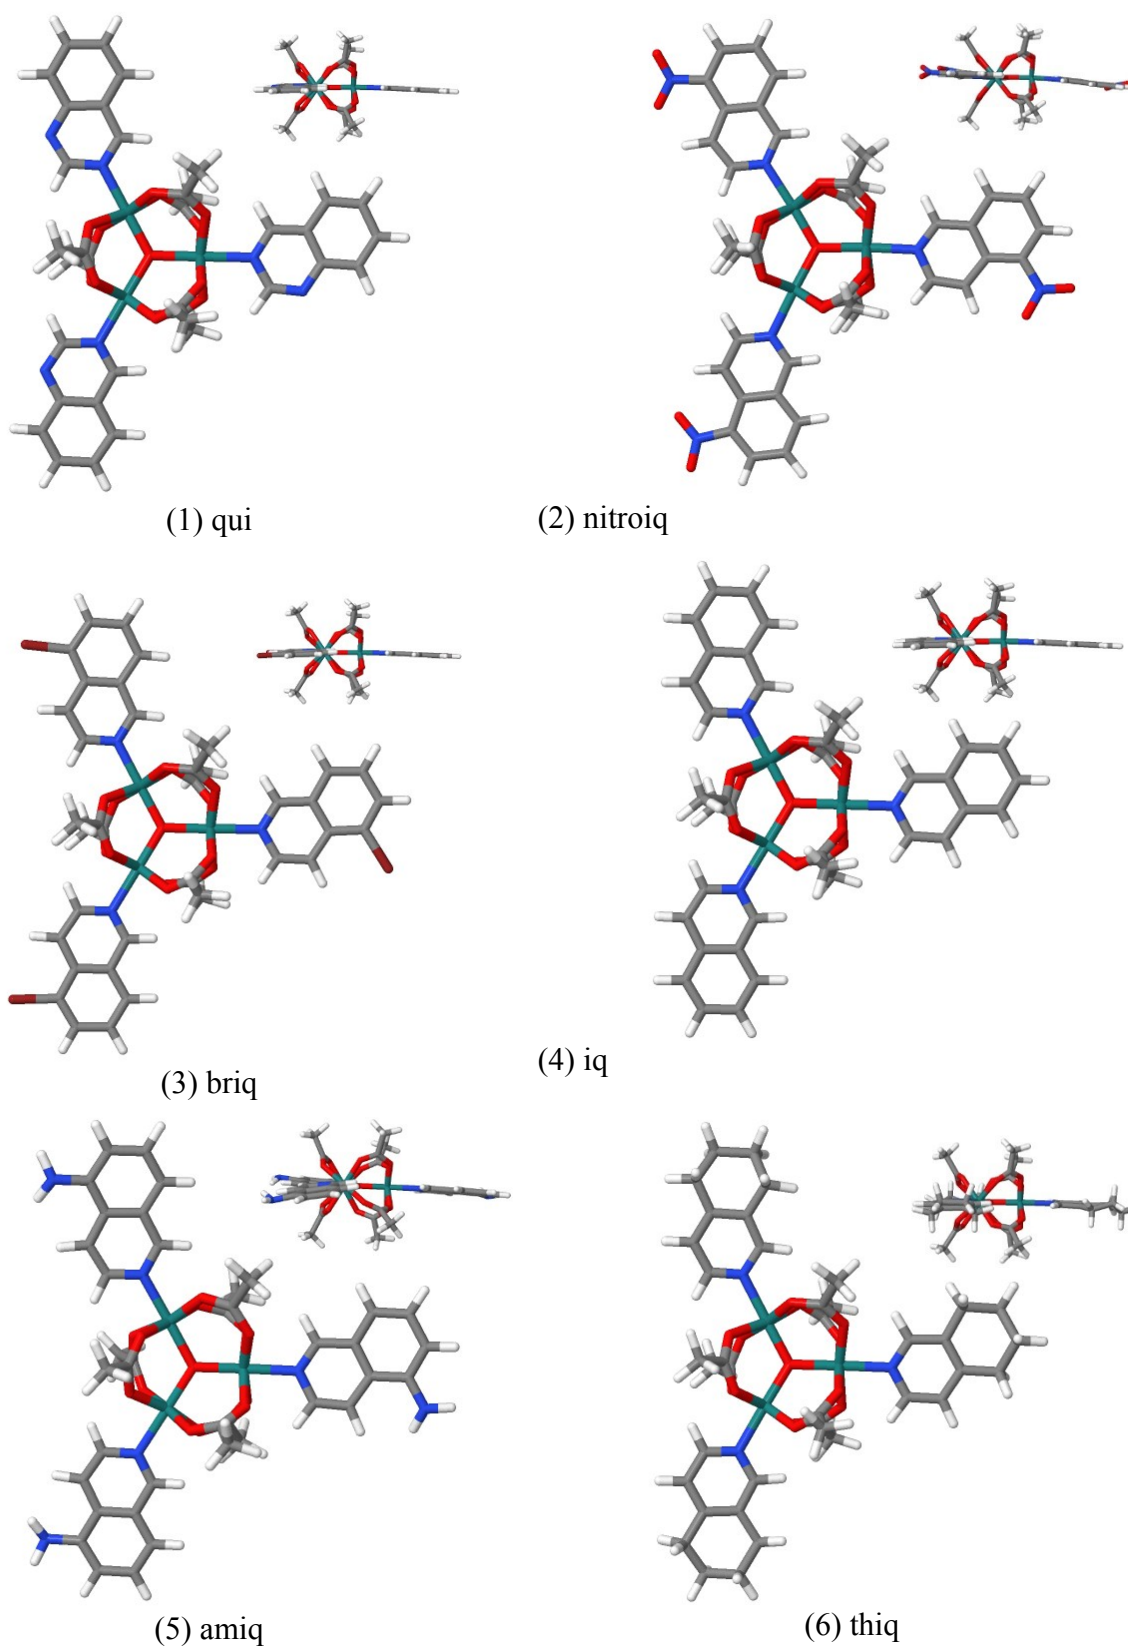

Figure S2. Up and side views of the equilibrium geometries obtained with DFT using PBE0/def2-TZVP. Color labels: Ru (green), O (red), N (blue), C (dark gray), H (white).

Table S6. Cartesian coordinates for complex (1) qui obtained with DFT using PBE0/def2-TZVP.

|    |           |           |           |
|----|-----------|-----------|-----------|
| O  | -0.044913 | 0.020847  | -0.016789 |
| Ru | 1.931002  | -0.026692 | -0.028966 |
| Ru | -0.956311 | 1.703676  | -0.083972 |
| Ru | -1.027546 | -1.611475 | 0.066193  |
| N  | 4.026938  | -0.070297 | 0.014845  |
| N  | 5.985523  | -1.401936 | 0.118711  |
| C  | 4.744624  | 1.031867  | 0.039115  |
| H  | 4.204336  | 1.970556  | 0.011022  |
| C  | 6.144017  | 1.001833  | 0.114281  |
| C  | 6.941215  | 2.164823  | 0.160018  |
| H  | 6.465012  | 3.138840  | 0.138841  |
| C  | 8.300927  | 2.044962  | 0.231920  |
| H  | 8.926075  | 2.928770  | 0.270582  |
| C  | 8.902998  | 0.769705  | 0.262684  |
| H  | 9.983098  | 0.699267  | 0.323096  |
| C  | 8.149824  | -0.374481 | 0.224448  |
| H  | 8.600869  | -1.358747 | 0.253781  |
| C  | 6.746878  | -0.279149 | 0.151208  |
| C  | 4.699226  | -1.256939 | 0.057739  |
| H  | 4.075671  | -2.141184 | 0.027139  |
| N  | -1.940001 | 3.568659  | -0.102808 |
| N  | -3.984737 | 4.758387  | -0.020902 |
| C  | -1.252917 | 4.689251  | -0.063968 |
| H  | -0.172624 | 4.604383  | -0.097065 |
| C  | -1.880024 | 5.938131  | 0.018394  |
| C  | -1.173968 | 7.157912  | 0.090008  |
| H  | -0.089311 | 7.150387  | 0.077158  |
| C  | -1.870245 | 8.330261  | 0.180082  |
| H  | -1.341832 | 9.274045  | 0.239144  |
| C  | -3.281779 | 8.321080  | 0.199390  |
| H  | -3.812737 | 9.263176  | 0.271911  |
| C  | -3.988911 | 7.149431  | 0.132475  |
| H  | -5.071387 | 7.130387  | 0.151089  |
| C  | -3.297265 | 5.927019  | 0.040675  |
| C  | -3.300182 | 3.659837  | -0.084248 |
| H  | -3.827397 | 2.714978  | -0.121718 |
| N  | -2.096150 | -3.429014 | 0.142565  |
| N  | -4.198330 | -4.515681 | 0.156644  |
| C  | -1.467079 | -4.579694 | 0.057064  |
| H  | -0.383486 | -4.546642 | 0.028314  |
| C  | -2.159598 | -5.794997 | -0.004395 |

|   |           |           |           |
|---|-----------|-----------|-----------|
| C | -1.518935 | -7.045414 | -0.125988 |
| H | -0.435886 | -7.089493 | -0.166460 |
| C | -2.275702 | -8.180929 | -0.198607 |
| H | -1.797526 | -9.148030 | -0.294588 |
| C | -3.684445 | -8.103247 | -0.155442 |
| H | -4.264071 | -9.016765 | -0.219531 |
| C | -4.329256 | -6.900114 | -0.037580 |
| H | -5.409283 | -6.827719 | -0.005301 |
| C | -3.574112 | -5.715008 | 0.042489  |
| C | -3.457996 | -3.452994 | 0.195272  |
| H | -3.934149 | -2.483607 | 0.271709  |
| O | 2.028133  | -1.665648 | -1.208130 |
| O | -0.068367 | -2.384456 | -1.547934 |
| C | 1.140328  | -2.287433 | -1.859969 |
| C | 1.558374  | -2.953404 | -3.135074 |
| H | 1.471511  | -2.212066 | -3.934847 |
| H | 0.896625  | -3.783958 | -3.371123 |
| H | 2.596073  | -3.279440 | -3.088374 |
| O | 1.986129  | -1.052518 | 1.702184  |
| O | 0.230133  | -2.443956 | 1.471958  |
| C | 1.183787  | -1.944534 | 2.111404  |
| C | 1.392299  | -2.406053 | 3.521727  |
| H | 2.423931  | -2.258677 | 3.834657  |
| H | 1.076756  | -3.441043 | 3.644668  |
| H | 0.752374  | -1.790318 | 4.160406  |
| O | -2.441562 | -1.033566 | -1.290975 |
| O | -2.080782 | 1.147154  | -1.680183 |
| C | -2.560975 | 0.020222  | -1.966385 |
| C | -3.315441 | -0.091475 | -3.259649 |
| H | -2.628389 | -0.499050 | -4.006941 |
| H | -3.667272 | 0.880808  | -3.598708 |
| H | -4.143145 | -0.791802 | -3.161355 |
| O | -2.109625 | -1.029585 | 1.669428  |
| O | -2.374714 | 1.171669  | 1.305731  |
| C | -2.563061 | 0.111507  | 1.951328  |
| C | -3.390353 | 0.182597  | 3.202186  |
| H | -4.247447 | -0.487419 | 3.114969  |
| H | -3.727124 | 1.197305  | 3.399658  |
| H | -2.784825 | -0.179963 | 4.035269  |
| O | 0.307885  | 2.504717  | -1.489717 |
| O | 1.987116  | 1.037790  | -1.740389 |
| C | 1.234641  | 1.964910  | -2.143922 |
| C | 1.464930  | 2.444471  | -3.544925 |
| H | 2.491847  | 2.263631  | -3.856920 |

|   |          |          |           |
|---|----------|----------|-----------|
| H | 1.192355 | 3.493985 | -3.646544 |
| H | 0.804221 | 1.869827 | -4.199806 |
| O | 0.097139 | 2.464772 | 1.480567  |
| O | 2.157101 | 1.637478 | 1.119373  |
| C | 1.324465 | 2.372121 | 1.720243  |
| C | 1.876998 | 3.215137 | 2.831240  |
| H | 2.592303 | 3.927710 | 2.414099  |
| H | 2.424024 | 2.579425 | 3.529163  |
| H | 1.085445 | 3.752317 | 3.348069  |

Table S7. Cartesian coordinates for complex (2) nitroiq obtained with DFT using PBE0/def2-TZVP.

|    |           |           |           |
|----|-----------|-----------|-----------|
| O  | -1.952413 | 5.815146  | -0.520188 |
| Ru | -0.965430 | 7.546368  | -0.531700 |
| Ru | -0.980036 | 4.175020  | -0.418433 |
| Ru | -3.865602 | 5.830408  | -0.642928 |
| N  | -0.031205 | 9.420030  | -0.658769 |
| C  | 1.268843  | 9.589771  | -0.717175 |
| H  | 1.880284  | 8.698622  | -0.649521 |
| C  | 1.877190  | 10.850360 | -0.876160 |
| C  | 3.283084  | 10.954787 | -0.929786 |
| H  | 3.879395  | 10.051694 | -0.859979 |
| C  | 3.878775  | 12.176985 | -1.063582 |
| H  | 4.956773  | 12.267066 | -1.106109 |
| C  | 3.086553  | 13.332025 | -1.147690 |
| H  | 3.542208  | 14.309234 | -1.241443 |
| C  | 1.719011  | 13.249829 | -1.122454 |
| C  | 1.051769  | 12.004739 | -0.981667 |
| C  | -0.340740 | 11.785362 | -0.905785 |
| H  | -1.032005 | 12.608172 | -0.983222 |
| C  | -0.822197 | 10.521159 | -0.748982 |
| H  | -1.884608 | 10.339742 | -0.680953 |
| N  | 0.986323  | 14.522073 | -1.249474 |
| O  | 1.603657  | 15.537739 | -1.029715 |
| O  | -0.180929 | 14.479354 | -1.579551 |
| N  | 0.003356  | 2.312862  | -0.236845 |
| C  | -0.756882 | 1.188999  | -0.229217 |
| H  | -1.818025 | 1.345182  | -0.354583 |
| C  | -0.242350 | -0.061661 | -0.074784 |
| H  | -0.906041 | -0.910153 | -0.061136 |
| C  | 1.151247  | -0.232395 | 0.071575  |
| C  | 1.849139  | -1.460019 | 0.205336  |
| C  | 3.216473  | -1.505413 | 0.276066  |

|   |            |           |           |
|---|------------|-----------|-----------|
| H | 3.696329   | -2.472228 | 0.355629  |
| C | 3.977245   | -0.326146 | 0.258209  |
| H | 5.055163   | -0.387125 | 0.337382  |
| C | 3.350706   | 0.882866  | 0.148873  |
| H | 3.922008   | 1.804580  | 0.138604  |
| C | 1.945723   | 0.948537  | 0.042390  |
| C | 1.301608   | 2.191659  | -0.103819 |
| H | 1.881025   | 3.107576  | -0.111960 |
| N | 1.146050   | -2.752243 | 0.272914  |
| O | 1.792297   | -3.742417 | 0.023945  |
| O | -0.025504  | -2.748999 | 0.589688  |
| N | -5.985603  | 5.930819  | -0.732696 |
| C | -6.570711  | 7.102325  | -0.818870 |
| H | -5.923246  | 7.965939  | -0.916641 |
| C | -7.965845  | 7.274810  | -0.795780 |
| C | -8.507607  | 8.572758  | -0.900782 |
| H | -7.832864  | 9.415990  | -0.997915 |
| C | -9.859793  | 8.756159  | -0.886896 |
| H | -10.290439 | 9.745041  | -0.978814 |
| C | -10.703806 | 7.648089  | -0.737167 |
| H | -11.777957 | 7.773652  | -0.705452 |
| C | -10.199193 | 6.380139  | -0.606314 |
| C | -8.799229  | 6.127925  | -0.655775 |
| C | -8.134877  | 4.880990  | -0.593040 |
| H | -8.697713  | 3.967210  | -0.501832 |
| C | -6.771077  | 4.829391  | -0.635514 |
| H | -6.243040  | 3.888438  | -0.577209 |
| N | -11.199545 | 5.319405  | -0.380277 |
| O | -12.363764 | 5.646231  | -0.391470 |
| O | -10.803716 | 4.191369  | -0.177673 |
| O | 0.441052   | 4.673597  | -1.790938 |
| C | 1.011257   | 5.769226  | -1.991570 |
| O | 0.648536   | 6.899061  | -1.560271 |
| C | 2.267261   | 5.769530  | -2.814521 |
| H | 3.083054   | 6.161505  | -2.202897 |
| H | 2.149209   | 6.442192  | -3.665174 |
| H | 2.512892   | 4.768923  | -3.162125 |
| O | -1.776450  | 8.037971  | -2.308129 |
| C | -2.927580  | 7.777004  | -2.767257 |
| O | -3.868998  | 7.228877  | -2.150002 |
| C | -3.152916  | 8.154041  | -4.200503 |
| H | -2.838006  | 9.181842  | -4.384180 |
| H | -4.190938  | 8.000410  | -4.485582 |
| H | -2.517996  | 7.513691  | -4.817914 |

|   |           |          |           |
|---|-----------|----------|-----------|
| O | -3.922417 | 4.479509 | -2.162007 |
| C | -3.079029 | 3.623997 | -2.536748 |
| O | -2.007247 | 3.313685 | -1.955477 |
| C | -3.354632 | 2.933155 | -3.842986 |
| H | -4.422952 | 2.782077 | -3.990939 |
| H | -2.814630 | 1.991028 | -3.906440 |
| H | -2.994222 | 3.586781 | -4.642359 |
| O | -2.175279 | 3.430702 | 1.040634  |
| C | -3.361965 | 3.660229 | 1.380272  |
| O | -4.173655 | 4.413894 | 0.788376  |
| C | -3.834691 | 2.995270 | 2.639306  |
| H | -3.673390 | 3.696667 | 3.462676  |
| H | -3.258765 | 2.094897 | 2.841665  |
| H | -4.899939 | 2.774913 | 2.591015  |
| O | 0.006289  | 7.082522 | 1.189426  |
| C | 0.351356  | 5.960942 | 1.654061  |
| O | 0.221455  | 4.842961 | 1.098080  |
| C | 0.975113  | 5.957820 | 3.019931  |
| H | 1.307373  | 6.952318 | 3.309580  |
| H | 1.799932  | 5.247687 | 3.060712  |
| H | 0.220521  | 5.611039 | 3.731402  |
| O | -2.298696 | 8.475043 | 0.651681  |
| C | -3.275444 | 8.012769 | 1.311992  |
| O | -4.043451 | 7.104446 | 0.931699  |
| C | -3.510673 | 8.580245 | 2.676480  |
| H | -2.866265 | 8.029664 | 3.367917  |
| H | -4.543468 | 8.432814 | 2.985787  |
| H | -3.220682 | 9.628961 | 2.723815  |

Table S8. Cartesian coordinates for complex (3) briq obtained with DFT using PBE0/def2-TZVP.

|    |           |           |           |
|----|-----------|-----------|-----------|
| O  | -0.064018 | -0.003109 | -0.008650 |
| Ru | 1.913965  | -0.053556 | -0.006058 |
| Ru | -0.967751 | 1.688364  | -0.087395 |
| Ru | -1.056537 | -1.632099 | 0.050979  |
| N  | 4.008441  | -0.079177 | 0.041183  |
| C  | 4.697421  | 1.040036  | 0.066887  |
| H  | 4.128591  | 1.960937  | 0.044985  |
| C  | 6.101653  | 1.084030  | 0.136886  |
| C  | 6.797214  | 2.310609  | 0.185292  |
| H  | 6.236665  | 3.238078  | 0.170752  |
| C  | 8.161879  | 2.314623  | 0.251729  |
| H  | 8.710343  | 3.247763  | 0.293647  |



|   |           |           |           |
|---|-----------|-----------|-----------|
| C | 8.878869  | 1.103510  | 0.270514  |
| H | 9.960313  | 1.117567  | 0.323944  |
| C | 8.219225  | -0.094796 | 0.226880  |
| C | 6.806803  | -0.147743 | 0.165462  |
| C | 4.681173  | -1.259324 | 0.075767  |
| H | 4.065063  | -2.146134 | 0.043370  |
| N | -1.945400 | 3.560389  | -0.117772 |
| C | -1.243685 | 4.671603  | -0.105942 |
| H | -0.166907 | 4.565251  | -0.161696 |
| C | -1.820053 | 5.951144  | -0.024355 |
| C | -1.025861 | 7.117950  | 0.009361  |
| H | 0.053525  | 7.030004  | -0.040636 |
| C | -1.624960 | 8.341225  | 0.106949  |
| H | -1.029260 | 9.245363  | 0.136575  |
| C | -3.027476 | 8.445248  | 0.171389  |
| H | -3.489591 | 9.421024  | 0.250562  |
| C | -3.812913 | 7.324190  | 0.138987  |
| C | -3.236956 | 6.036356  | 0.037739  |
| C | -3.300452 | 3.640372  | -0.077549 |
| H | -3.823226 | 2.694905  | -0.093141 |
| N | -2.156958 | -3.436293 | 0.112782  |
| C | -1.543846 | -4.596300 | 0.068468  |
| H | -0.460239 | -4.571994 | 0.063630  |
| C | -2.223423 | -5.826663 | 0.024054  |
| C | -1.525591 | -7.050775 | -0.042661 |
| H | -0.441578 | -7.045758 | -0.051919 |
| C | -2.223826 | -8.223411 | -0.099345 |
| H | -1.702569 | -9.171200 | -0.153316 |
| C | -3.631892 | -8.218560 | -0.091821 |
| H | -4.173378 | -9.154757 | -0.140432 |
| C | -4.324525 | -7.039395 | -0.025931 |
| C | -3.643693 | -5.801368 | 0.034721  |
| C | -3.514507 | -3.408976 | 0.135466  |
| H | -3.958983 | -2.424901 | 0.170437  |
| O | 2.011774  | -1.678949 | -1.209319 |
| O | -0.086076 | -2.393558 | -1.559828 |
| C | 1.124621  | -2.297588 | -1.864373 |
| C | 1.545843  | -2.963438 | -3.139221 |
| H | 1.447729  | -2.226356 | -3.941514 |
| H | 0.892028  | -3.801914 | -3.369670 |
| H | 2.587065  | -3.278090 | -3.095233 |
| O | 1.986292  | -1.151722 | 1.683859  |
| O | 0.188908  | -2.490108 | 1.444240  |
| C | 1.187176  | -2.059096 | 2.064616  |

|    |           |           |           |
|----|-----------|-----------|-----------|
| C  | 1.462374  | -2.643998 | 3.420088  |
| H  | 2.532652  | -2.730978 | 3.602275  |
| H  | 0.962939  | -3.602939 | 3.538878  |
| H  | 1.054690  | -1.952511 | 4.162807  |
| O  | -2.458727 | -1.037487 | -1.314705 |
| O  | -2.073478 | 1.138966  | -1.701845 |
| C  | -2.558613 | 0.016143  | -1.993215 |
| C  | -3.294503 | -0.091600 | -3.298206 |
| H  | -2.594459 | -0.491212 | -4.037705 |
| H  | -3.645274 | 0.881018  | -3.637649 |
| H  | -4.119817 | -0.796816 | -3.217208 |
| O  | -2.137451 | -1.052729 | 1.654844  |
| O  | -2.392251 | 1.151779  | 1.299417  |
| C  | -2.575166 | 0.091407  | 1.946403  |
| C  | -3.370855 | 0.164978  | 3.218187  |
| H  | -4.209174 | -0.531906 | 3.174068  |
| H  | -3.727553 | 1.174281  | 3.408310  |
| H  | -2.727211 | -0.162081 | 4.037872  |
| O  | 0.303575  | 2.488884  | -1.484477 |
| O  | 1.988711  | 1.025869  | -1.706713 |
| C  | 1.238510  | 1.947399  | -2.125159 |
| C  | 1.481274  | 2.417920  | -3.527318 |
| H  | 2.510074  | 2.232475  | -3.830230 |
| H  | 1.211584  | 3.467216  | -3.638297 |
| H  | 0.823902  | 1.840456  | -4.183127 |
| O  | 0.065707  | 2.445391  | 1.488411  |
| O  | 2.120161  | 1.579174  | 1.188285  |
| C  | 1.284232  | 2.332402  | 1.760160  |
| C  | 1.822701  | 3.178350  | 2.876339  |
| H  | 2.527956  | 3.901938  | 2.460578  |
| H  | 2.377227  | 2.550167  | 3.574617  |
| H  | 1.022601  | 3.706409  | 3.389412  |
| C  | -4.269911 | -4.541115 | 0.101398  |
| C  | 6.040322  | -1.329827 | 0.131907  |
| C  | -3.962453 | 4.828436  | -0.004155 |
| H  | -5.349304 | -4.471972 | 0.117459  |
| H  | -5.043393 | 4.844191  | 0.032404  |
| H  | 6.529944  | -2.293929 | 0.155020  |
| Br | -6.207915 | -7.077407 | -0.021081 |
| Br | -5.685247 | 7.514534  | 0.234690  |
| Br | 9.222512  | -1.687817 | 0.254375  |

Table S9. Cartesian coordinates for complex (4) iq obtained with DFT using PBE0/def2-TZVP.

|    |           |           |           |
|----|-----------|-----------|-----------|
| O  | -0.064908 | 0.005135  | -0.026148 |
| Ru | 1.908611  | -0.049238 | -0.030762 |
| Ru | -0.970357 | 1.698937  | -0.094532 |
| Ru | -1.059852 | -1.625618 | 0.049158  |
| N  | 4.009456  | -0.113600 | 0.021898  |
| C  | 4.725751  | 0.989743  | 0.042341  |
| H  | 4.177582  | 1.923089  | 0.010977  |
| C  | 6.130388  | 0.995179  | 0.117683  |
| C  | 6.872274  | 2.195986  | 0.157681  |
| H  | 6.346102  | 3.143757  | 0.133648  |
| C  | 8.236964  | 2.153350  | 0.227386  |
| H  | 8.811321  | 3.071374  | 0.261254  |
| C  | 8.909702  | 0.914390  | 0.261453  |
| H  | 9.992055  | 0.900277  | 0.318783  |
| C  | 8.213805  | -0.264158 | 0.230281  |
| H  | 8.734751  | -1.214611 | 0.263723  |
| C  | 6.804940  | -0.250875 | 0.161002  |
| C  | 4.651970  | -1.312000 | 0.069650  |
| H  | 4.012311  | -2.182067 | 0.040292  |
| N  | -1.957977 | 3.563497  | -0.118234 |
| C  | -1.266494 | 4.681751  | -0.079182 |
| H  | -0.188092 | 4.584809  | -0.121622 |
| C  | -1.860837 | 5.951541  | 0.017051  |
| C  | -1.094830 | 7.137108  | 0.084745  |
| H  | -0.012543 | 7.074431  | 0.051219  |
| C  | -1.720998 | 8.346832  | 0.195524  |
| H  | -1.138622 | 9.258580  | 0.250902  |
| C  | -3.129088 | 8.416970  | 0.241540  |
| H  | -3.608694 | 9.384618  | 0.332391  |
| C  | -3.893732 | 7.283552  | 0.177357  |
| H  | -4.975361 | 7.343983  | 0.218899  |
| C  | -3.276955 | 6.021199  | 0.061752  |
| C  | -3.315786 | 3.625840  | -0.094130 |
| H  | -3.824863 | 2.673617  | -0.133082 |
| N  | -2.152530 | -3.433297 | 0.121757  |
| C  | -1.526148 | -4.587330 | 0.066458  |
| H  | -0.442903 | -4.549447 | 0.059363  |
| C  | -2.195388 | -5.821992 | 0.011139  |
| C  | -1.498905 | -7.047530 | -0.071638 |
| H  | -0.414422 | -7.042659 | -0.082688 |
| C  | -2.195017 | -8.221540 | -0.142156 |

|   |           |           |           |
|---|-----------|-----------|-----------|
| H | -1.666243 | -9.164561 | -0.208160 |
| C | -3.605603 | -8.214454 | -0.134032 |
| H | -4.140808 | -9.154798 | -0.195184 |
| C | -4.304245 | -7.040164 | -0.052726 |
| H | -5.388360 | -7.040617 | -0.049695 |
| C | -3.613744 | -5.813216 | 0.023680  |
| C | -3.511563 | -3.418349 | 0.150444  |
| H | -3.963174 | -2.437848 | 0.197792  |
| O | 1.998631  | -1.692371 | -1.212073 |
| O | -0.101820 | -2.393388 | -1.566274 |
| C | 1.109923  | -2.303989 | -1.869722 |
| C | 1.527169  | -2.969355 | -3.146343 |
| H | 1.430328  | -2.230103 | -3.946800 |
| H | 0.870168  | -3.805173 | -3.377432 |
| H | 2.567402  | -3.287514 | -3.104375 |
| O | 1.948509  | -1.075949 | 1.702889  |
| O | 0.190156  | -2.463252 | 1.458652  |
| C | 1.140730  | -1.965056 | 2.103954  |
| C | 1.335082  | -2.426607 | 3.517069  |
| H | 2.362935  | -2.276348 | 3.840986  |
| H | 1.020095  | -3.462215 | 3.636783  |
| H | 0.687118  | -1.812220 | 4.148766  |
| O | -2.464870 | -1.033645 | -1.314243 |
| O | -2.085041 | 1.144818  | -1.701237 |
| C | -2.568059 | 0.020751  | -1.990816 |
| C | -3.307944 | -0.087318 | -3.293851 |
| H | -2.609652 | -0.485676 | -4.035592 |
| H | -3.660754 | 0.885238  | -3.631469 |
| H | -4.132191 | -0.793556 | -3.210531 |
| O | -2.136286 | -1.039738 | 1.655683  |
| O | -2.391156 | 1.164127  | 1.297587  |
| C | -2.575474 | 0.104369  | 1.944303  |
| C | -3.379306 | 0.179272  | 3.211702  |
| H | -4.225061 | -0.507950 | 3.155979  |
| H | -3.727290 | 1.191287  | 3.403794  |
| H | -2.747611 | -0.159434 | 4.035665  |
| O | 0.304902  | 2.493012  | -1.491478 |
| O | 1.971970  | 1.012239  | -1.745895 |
| C | 1.228700  | 1.946973  | -2.145531 |
| C | 1.463398  | 2.430142  | -3.545128 |
| H | 2.490844  | 2.248180  | -3.854836 |
| H | 1.193000  | 3.480440  | -3.644162 |
| H | 0.803261  | 1.858143  | -4.202867 |
| O | 0.075634  | 2.448841  | 1.476135  |

|   |           |           |           |
|---|-----------|-----------|-----------|
| O | 2.134199  | 1.613521  | 1.123260  |
| C | 1.303770  | 2.354534  | 1.715838  |
| C | 1.856270  | 3.207849  | 2.819685  |
| H | 2.563012  | 3.923357  | 2.393005  |
| H | 2.412201  | 2.581097  | 3.518448  |
| H | 1.063369  | 3.743215  | 3.336394  |
| C | -4.254150 | -4.558838 | 0.107764  |
| C | 6.008553  | -1.414878 | 0.133444  |
| C | -3.990203 | 4.805569  | -0.009684 |
| H | -5.335755 | -4.499353 | 0.130212  |
| H | -5.073316 | 4.807300  | 0.011513  |
| H | 6.473013  | -2.393034 | 0.167030  |

Table S10. Cartesian coordinates for complex (5) amiq obtained with DFT using PBE0/def2-TZVP.

|    |           |           |           |
|----|-----------|-----------|-----------|
| O  | -2.031928 | 5.919579  | -0.430101 |
| Ru | -1.029788 | 7.565234  | -0.522168 |
| Ru | -1.086692 | 4.191040  | -0.181670 |
| Ru | -3.939983 | 5.919954  | -0.602572 |
| N  | 0.041870  | 9.387473  | -0.663585 |
| C  | 1.352310  | 9.422276  | -0.575353 |
| H  | 1.848337  | 8.477523  | -0.388825 |
| C  | 2.114290  | 10.597226 | -0.710950 |
| C  | 3.520936  | 10.568599 | -0.631992 |
| H  | 4.030420  | 9.629353  | -0.453080 |
| C  | 4.214356  | 11.738979 | -0.777331 |
| H  | 5.296025  | 11.743305 | -0.713344 |
| C  | 3.546238  | 12.951488 | -0.995158 |
| H  | 4.125841  | 13.863445 | -1.096477 |
| C  | 2.169053  | 13.020359 | -1.087447 |
| C  | 1.420786  | 11.814123 | -0.943675 |
| C  | 0.014303  | 11.742898 | -1.027023 |
| H  | -0.583818 | 12.622208 | -1.229774 |
| C  | -0.626354 | 10.547849 | -0.889623 |
| H  | -1.700293 | 10.462429 | -0.966345 |
| N  | 1.536040  | 14.209995 | -1.372064 |
| H  | 2.100719  | 15.036733 | -1.267646 |
| H  | 0.603305  | 14.332871 | -1.016164 |
| N  | -0.107306 | 2.337440  | -0.001405 |
| C  | -0.816971 | 1.184787  | -0.124260 |
| H  | -1.891904 | 1.295284  | -0.135812 |
| C  | -0.215323 | -0.033132 | -0.239200 |
| H  | -0.848241 | -0.902023 | -0.368372 |

|   |            |           |           |
|---|------------|-----------|-----------|
| C | 1.191833   | -0.141238 | -0.229940 |
| C | 1.904452   | -1.365835 | -0.400471 |
| C | 3.286019   | -1.329003 | -0.373557 |
| H | 3.838246   | -2.254497 | -0.501621 |
| C | 3.992527   | -0.132377 | -0.193934 |
| H | 5.075653   | -0.161587 | -0.184109 |
| C | 3.334285   | 1.055759  | -0.029871 |
| H | 3.872937   | 1.985290  | 0.109694  |
| C | 1.925192   | 1.060334  | -0.049163 |
| C | 1.203286   | 2.262606  | 0.062756  |
| H | 1.735870   | 3.198160  | 0.173132  |
| N | 1.233569   | -2.541370 | -0.653617 |
| H | 1.780427   | -3.381700 | -0.565465 |
| H | 0.308533   | -2.639013 | -0.271410 |
| N | -6.061207  | 5.903254  | -0.741521 |
| C | -6.742871  | 7.025469  | -0.816510 |
| H | -6.163865  | 7.936502  | -0.903550 |
| C | -8.147930  | 7.092468  | -0.760563 |
| C | -8.822321  | 8.328622  | -0.812638 |
| H | -8.255371  | 9.245664  | -0.915528 |
| C | -10.188471 | 8.339145  | -0.731936 |
| H | -10.731624 | 9.275810  | -0.777359 |
| C | -10.912911 | 7.148031  | -0.589018 |
| H | -11.995406 | 7.192470  | -0.525204 |
| C | -10.287893 | 5.918116  | -0.512744 |
| C | -8.865220  | 5.875935  | -0.614337 |
| C | -8.105548  | 4.688111  | -0.570173 |
| H | -8.579041  | 3.721310  | -0.458966 |
| C | -6.744549  | 4.734173  | -0.635640 |
| H | -6.137806  | 3.840777  | -0.602148 |
| N | -11.009441 | 4.769704  | -0.274357 |
| H | -12.004132 | 4.844145  | -0.411204 |
| H | -10.635314 | 3.907465  | -0.632204 |
| O | 0.560867   | 4.661628  | -1.272407 |
| C | 0.951649   | 5.721464  | -1.827115 |
| O | 0.395216   | 6.843202  | -1.772589 |
| C | 2.233847   | 5.645610  | -2.606420 |
| H | 3.047295   | 5.948174  | -1.940266 |
| H | 2.212885   | 6.343611  | -3.441521 |
| H | 2.427057   | 4.632160  | -2.951739 |
| O | -1.997424  | 8.206955  | -2.204858 |
| C | -2.999432  | 7.743882  | -2.808422 |
| O | -3.859997  | 6.943771  | -2.360395 |
| C | -3.162215  | 8.158644  | -4.242207 |

|   |           |           |           |
|---|-----------|-----------|-----------|
| H | -2.866350 | 9.198037  | -4.381622 |
| H | -4.179953 | 7.982350  | -4.584088 |
| H | -2.485387 | 7.547119  | -4.844311 |
| O | -3.972790 | 4.247314  | -1.800332 |
| C | -3.056514 | 3.569192  | -2.319657 |
| O | -1.884511 | 3.413225  | -1.869755 |
| C | -3.343156 | 2.886759  | -3.627188 |
| H | -4.404933 | 2.672742  | -3.737038 |
| H | -2.746380 | 1.983231  | -3.735323 |
| H | -3.051831 | 3.578501  | -4.423065 |
| O | -2.505043 | 3.426924  | 1.039502  |
| C | -3.469604 | 3.996495  | 1.627040  |
| O | -4.166209 | 4.926875  | 1.162680  |
| C | -3.785120 | 3.536919  | 3.018215  |
| H | -3.143060 | 4.102927  | 3.699034  |
| H | -3.545991 | 2.481978  | 3.143866  |
| H | -4.821362 | 3.749323  | 3.274907  |
| O | 0.058466  | 7.107200  | 1.153950  |
| C | 0.162175  | 6.053532  | 1.829387  |
| O | -0.172406 | 4.889724  | 1.478302  |
| C | 0.753450  | 6.160354  | 3.206777  |
| H | 1.069392  | 7.177512  | 3.424910  |
| H | 1.594004  | 5.472364  | 3.305661  |
| H | 0.000294  | 5.843046  | 3.931489  |
| O | -2.252833 | 8.562948  | 0.741447  |
| C | -3.468846 | 8.431908  | 1.022644  |
| O | -4.263266 | 7.596395  | 0.528918  |
| C | -4.004893 | 9.380635  | 2.055930  |
| H | -3.413175 | 9.277171  | 2.966649  |
| H | -5.052080 | 9.181444  | 2.271593  |
| H | -3.880810 | 10.406500 | 1.703381  |

Table S11. Cartesian coordinates for complex (6) thiq obtained with DFT using PBE0/def2-TZVP.

|    |           |           |           |
|----|-----------|-----------|-----------|
| O  | -0.116832 | 0.009243  | -0.073999 |
| Ru | 1.854171  | -0.040648 | -0.060243 |
| Ru | -1.018966 | 1.709331  | -0.138292 |
| Ru | -1.100375 | -1.629567 | -0.013410 |
| N  | 3.957234  | -0.107469 | 0.015769  |
| C  | 4.691038  | 1.000941  | 0.127627  |
| H  | 4.135992  | 1.928780  | 0.175523  |
| C  | 6.076322  | 1.004150  | 0.204690  |
| C  | 6.816204  | 2.298266  | 0.409315  |

|   |           |           |           |
|---|-----------|-----------|-----------|
| C | 8.284737  | 2.211177  | 0.014042  |
| C | 8.931296  | 0.962698  | 0.595391  |
| H | 9.989115  | 0.923691  | 0.324211  |
| C | 8.240230  | -0.303597 | 0.108359  |
| C | 6.742335  | -0.219338 | 0.118919  |
| C | 4.593963  | -1.283291 | -0.024706 |
| H | 3.968924  | -2.160756 | -0.112534 |
| N | -1.981844 | 3.592666  | -0.127869 |
| C | -1.258282 | 4.705154  | 0.037920  |
| H | -0.183476 | 4.580830  | -0.002471 |
| C | -1.822365 | 5.944610  | 0.276654  |
| C | -1.016962 | 7.162040  | 0.603560  |
| C | -1.558687 | 8.441192  | -0.049255 |
| C | -3.096600 | 8.525949  | -0.094430 |
| C | -3.811626 | 7.374173  | 0.617163  |
| C | -3.215388 | 6.043956  | 0.296948  |
| C | -3.313432 | 3.691173  | -0.128976 |
| H | -3.857827 | 2.767184  | -0.271040 |
| N | -2.162203 | -3.456469 | 0.051247  |
| C | -1.519241 | -4.619129 | -0.059025 |
| H | -0.440203 | -4.554326 | -0.132926 |
| C | -2.155008 | -5.851497 | -0.087031 |
| C | -1.356654 | -7.112021 | -0.288156 |
| C | -2.112202 | -8.372492 | 0.109425  |
| C | -3.532098 | -8.357949 | -0.438671 |
| C | -4.312282 | -7.159267 | 0.081089  |
| C | -3.545145 | -5.870904 | 0.040999  |
| C | -3.494754 | -3.472964 | 0.152692  |
| H | -3.978671 | -2.508604 | 0.228026  |
| O | 1.962754  | -1.692395 | -1.236638 |
| O | -0.131792 | -2.388882 | -1.624301 |
| C | 1.086186  | -2.307230 | -1.904654 |
| C | 1.525756  | -2.989188 | -3.165030 |
| H | 1.457513  | -2.257504 | -3.975118 |
| H | 0.865394  | -3.820383 | -3.402928 |
| H | 2.560639  | -3.319718 | -3.093429 |
| O | 1.875718  | -1.052893 | 1.682695  |
| O | 0.142275  | -2.463003 | 1.405051  |
| C | 1.074455  | -1.954061 | 2.067622  |
| C | 1.250986  | -2.415244 | 3.483485  |
| H | 2.274894  | -2.264720 | 3.819752  |
| H | 0.934749  | -3.450794 | 3.599605  |
| H | 0.596113  | -1.799898 | 4.107054  |
| O | -2.498259 | -1.031825 | -1.380954 |



|   |           |           |           |
|---|-----------|-----------|-----------|
| O | -2.119530 | 1.152029  | -1.755429 |
| C | -2.598157 | 0.027194  | -2.051224 |
| C | -3.331286 | -0.076639 | -3.359070 |
| H | -2.630634 | -0.478020 | -4.096962 |
| H | -3.678418 | 0.897295  | -3.698510 |
| H | -4.158851 | -0.779594 | -3.280605 |
| O | -2.196843 | -1.044274 | 1.583389  |
| O | -2.456843 | 1.161892  | 1.229512  |
| C | -2.644147 | 0.097798  | 1.868089  |
| C | -3.467655 | 0.165653  | 3.123668  |
| H | -4.316203 | -0.516281 | 3.047514  |
| H | -3.814644 | 1.177694  | 3.317747  |
| H | -2.851414 | -0.182754 | 3.955072  |
| O | 0.272325  | 2.508344  | -1.514974 |
| O | 1.919618  | 1.009423  | -1.783634 |
| C | 1.186859  | 1.954229  | -2.176056 |
| C | 1.420212  | 2.438346  | -3.575784 |
| H | 2.447003  | 2.254186  | -3.886755 |
| H | 1.152144  | 3.489275  | -3.673436 |
| H | 0.758581  | 1.867416  | -4.232985 |
| O | 0.003549  | 2.433105  | 1.460667  |
| O | 2.068092  | 1.626711  | 1.090543  |
| C | 1.234660  | 2.353532  | 1.692271  |
| C | 1.784599  | 3.209996  | 2.795423  |
| H | 2.492178  | 3.924160  | 2.367696  |
| H | 2.338459  | 2.584972  | 3.497448  |
| H | 0.990425  | 3.745978  | 3.309605  |
| C | -4.206196 | -4.650566 | 0.159885  |
| C | 5.966899  | -1.370459 | 0.014887  |
| C | -3.960431 | 4.896506  | 0.059234  |
| H | -5.285570 | -4.620220 | 0.255784  |
| H | -5.043521 | 4.929335  | 0.048837  |
| H | 6.439073  | -2.344948 | -0.035812 |
| H | -2.140685 | -8.458468 | 1.201514  |
| H | -1.573460 | -9.248873 | -0.258584 |
| H | -0.413251 | -7.040586 | 0.260204  |
| H | -1.082472 | -7.177871 | -1.348838 |
| H | -4.604121 | -7.336063 | 1.124344  |
| H | -5.249226 | -7.034572 | -0.469154 |
| H | -4.054960 | -9.276137 | -0.161559 |
| H | -3.502825 | -8.332021 | -1.533750 |
| H | -4.876965 | 7.383128  | 0.376025  |
| H | -3.735718 | 7.518291  | 1.703361  |
| H | -3.428526 | 8.540270  | -1.135215 |

|   |           |           |           |
|---|-----------|-----------|-----------|
| H | -3.438330 | 9.465399  | 0.344780  |
| H | -1.166421 | 8.508588  | -1.066376 |
| H | -1.146925 | 9.298163  | 0.487728  |
| H | 0.030431  | 7.013895  | 0.329112  |
| H | -1.034422 | 7.286270  | 1.694004  |
| H | 8.810790  | 3.102219  | 0.364774  |
| H | 8.377858  | 2.199473  | -1.077630 |
| H | 6.746172  | 2.567707  | 1.471194  |
| H | 6.311985  | 3.100229  | -0.136238 |
| H | 8.887569  | 1.008385  | 1.689474  |
| H | 8.548726  | -0.520474 | -0.922375 |
| H | 8.557932  | -1.169890 | 0.695527  |

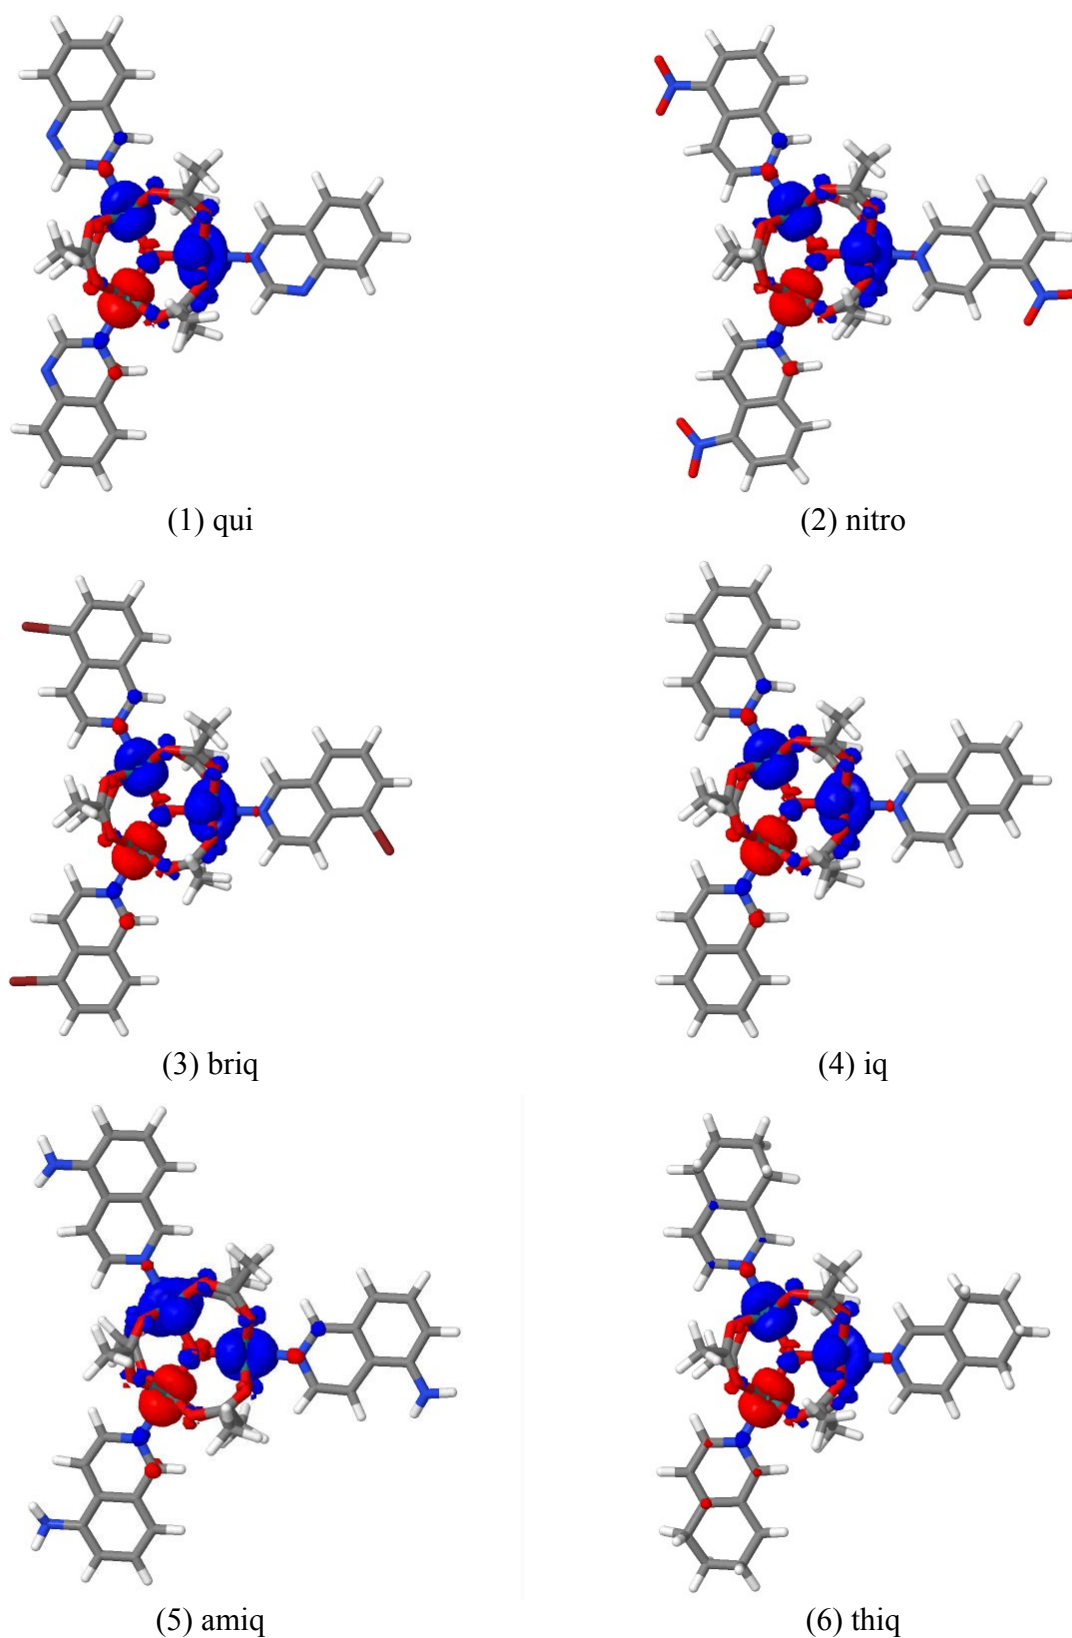

Figure S3. Plots of the spin densities calculated for all complexes obtained with DFT using PBE0/def2-TZVP. Color labels: positive (blue) and negative (red) spin densities (cutoff = 0.0025 au).

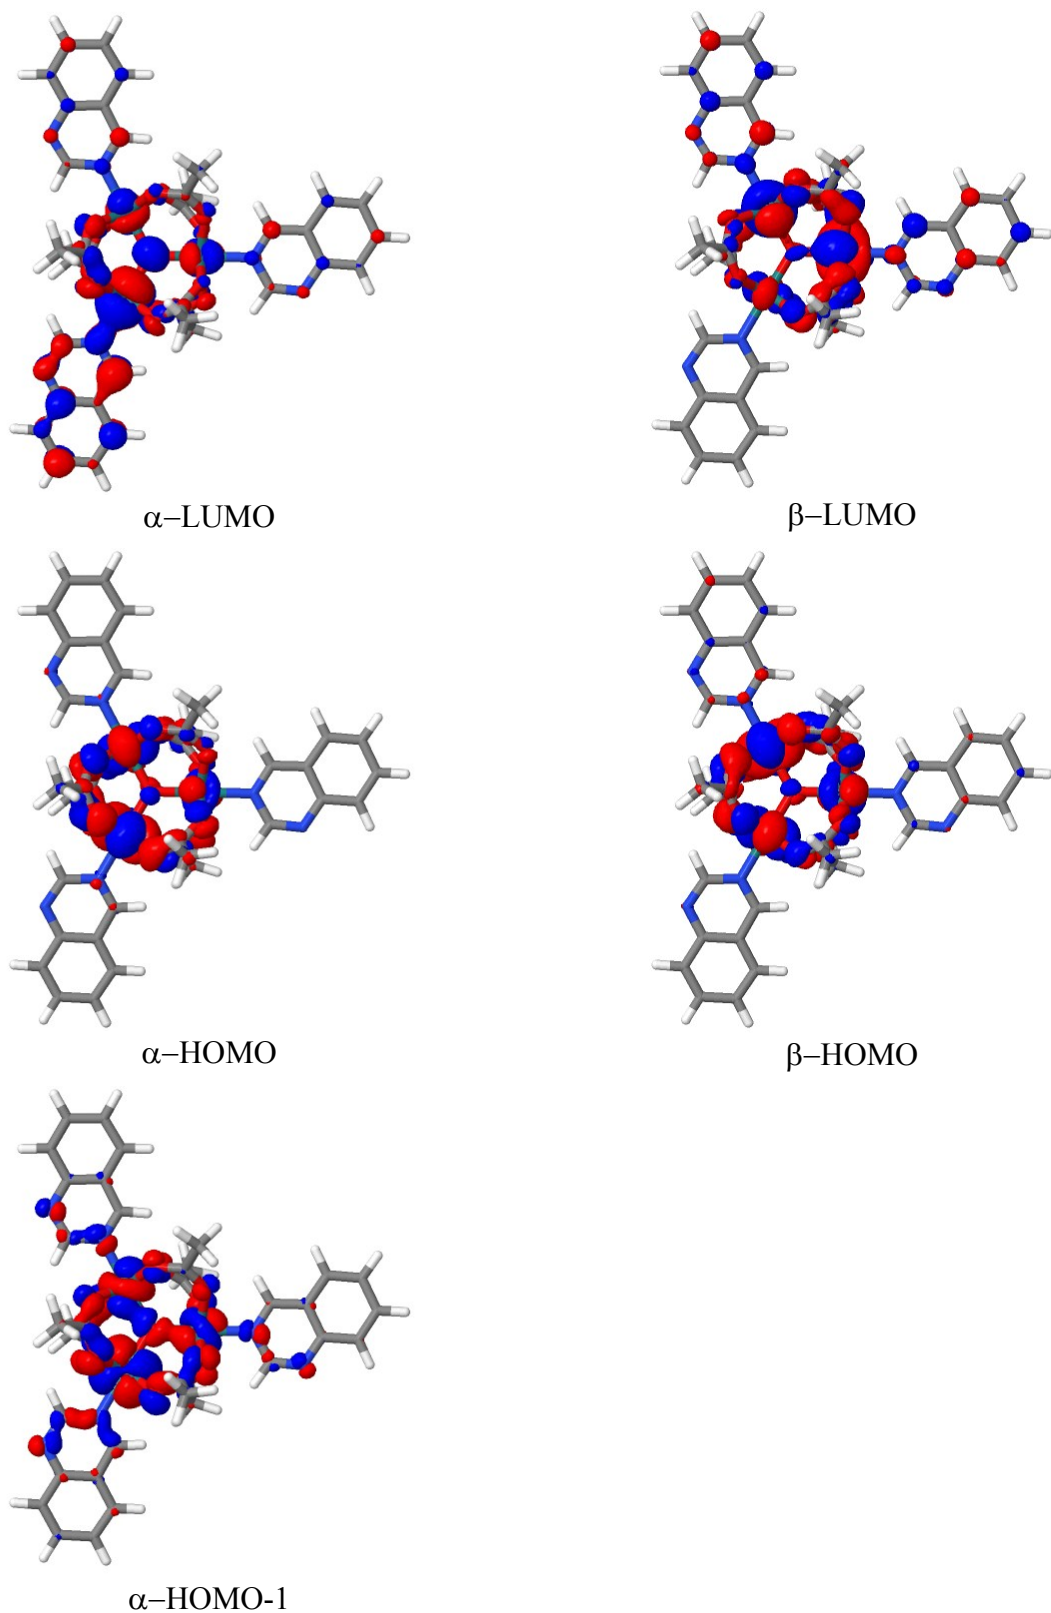

Figure S4. Plots of the frontier Kohn-Sham orbitals obtained with DFT using PBE0/def2-TZVP for the complex (1).

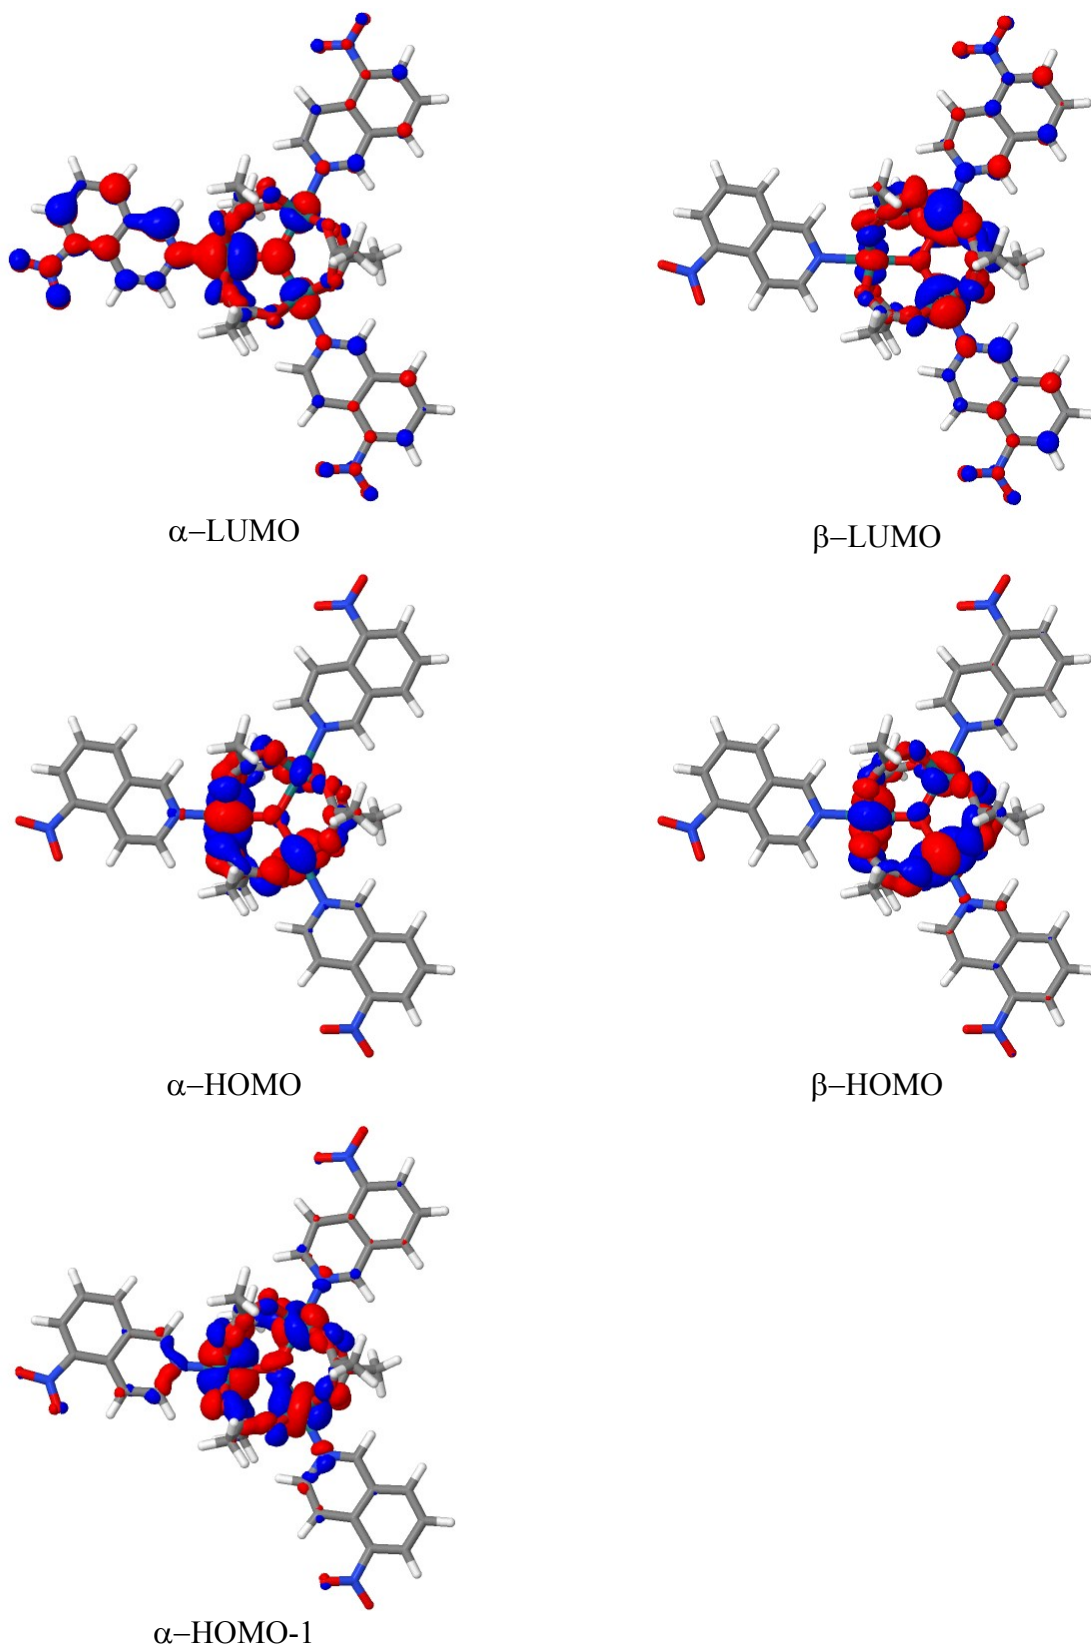

Figure S5. Plots of the frontier Kohn-Sham orbitals obtained with DFT using PBE0/def2-TZVP for the complex (2).

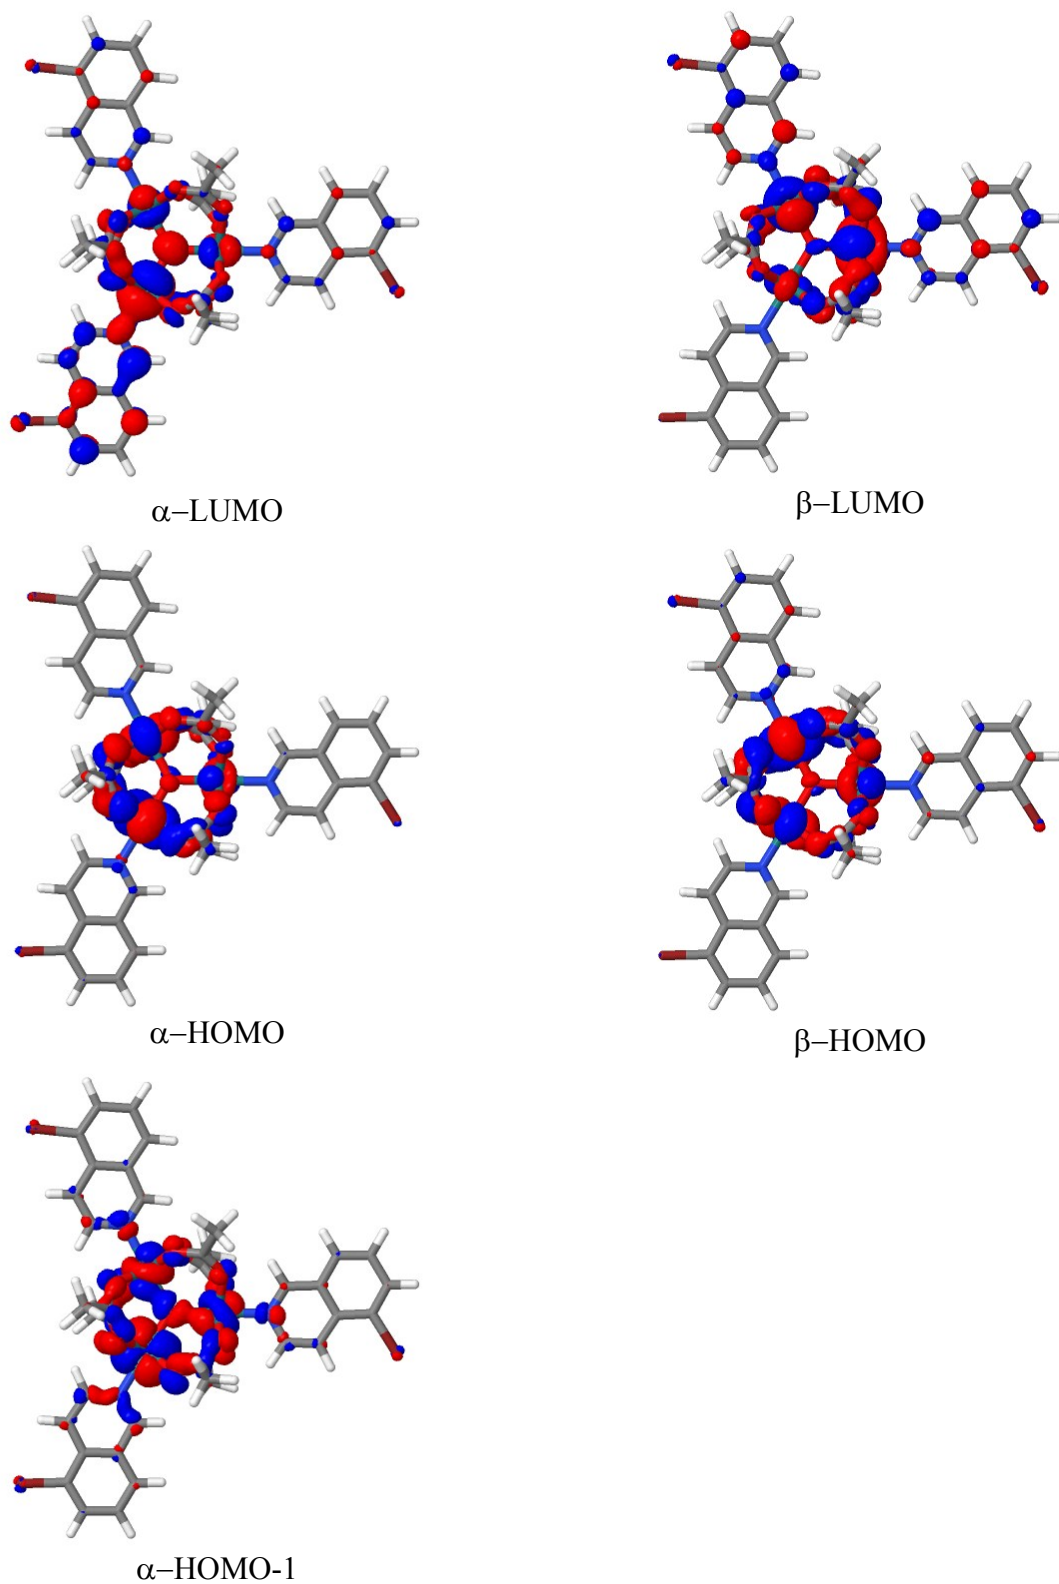

Figure S6. Plots of the frontier Kohn-Sham orbitals obtained with DFT using PBE0/def2-TZVP for the complex (3).

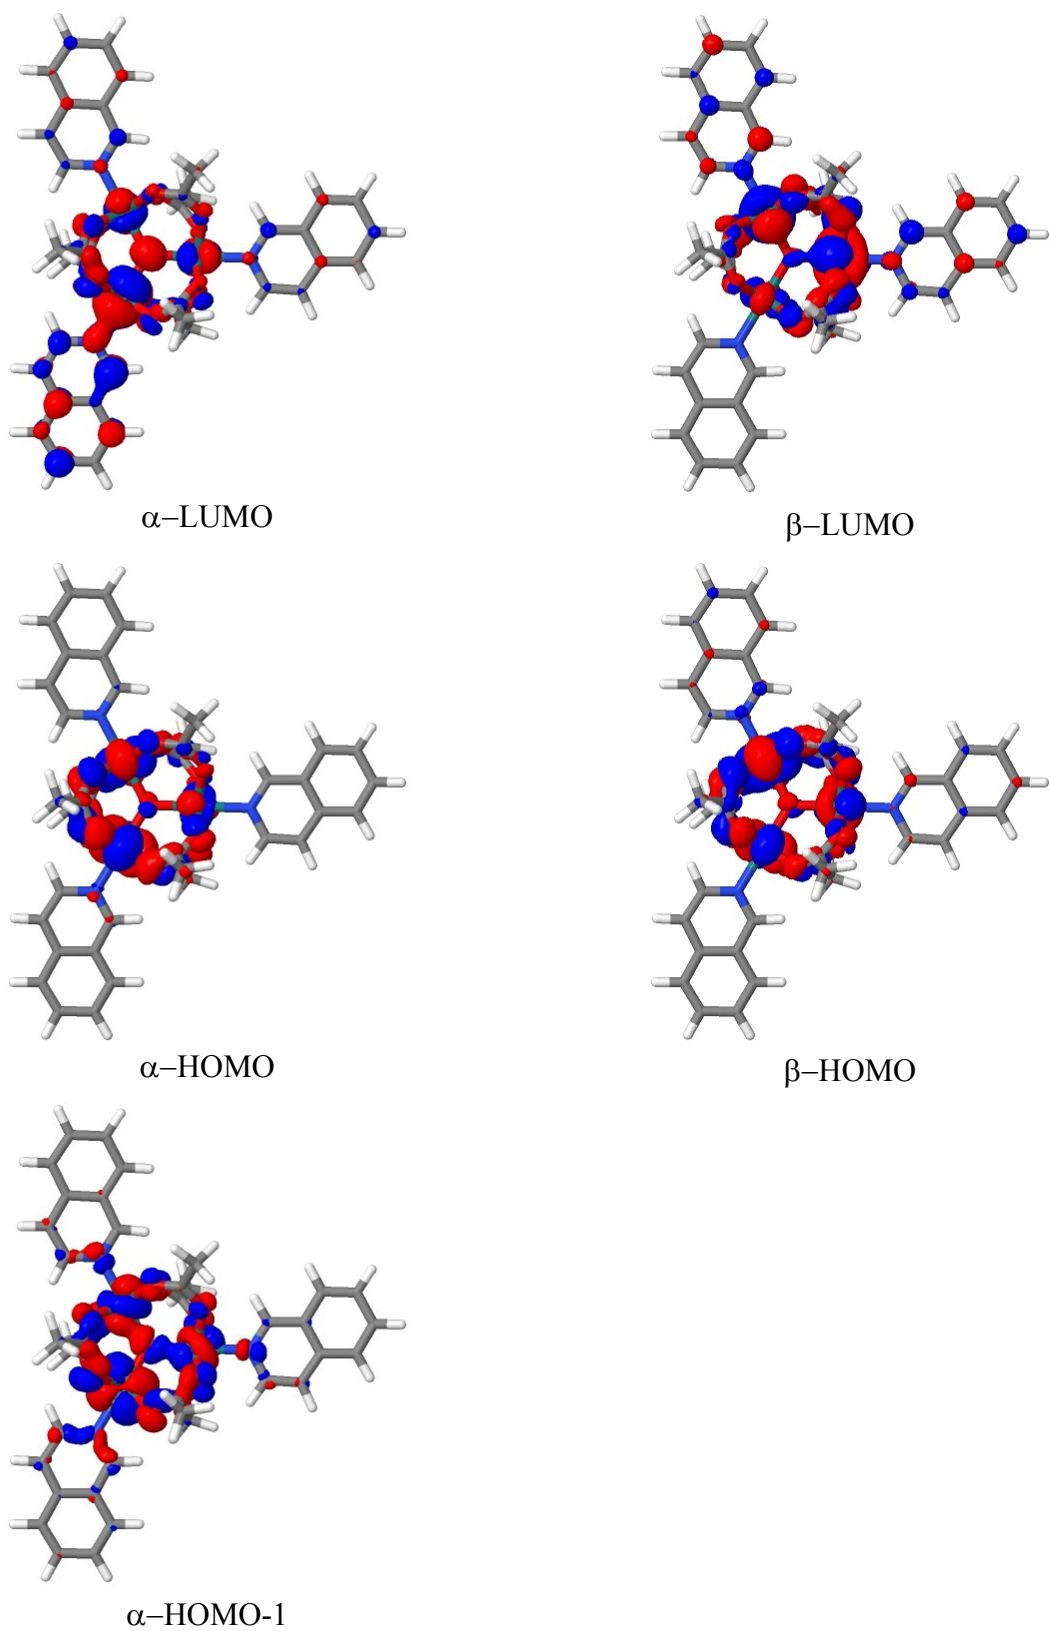

Figure S7. Plots of the frontier Kohn-Sham orbitals obtained with DFT using PBE0/def2-TZVP for the complex (4).



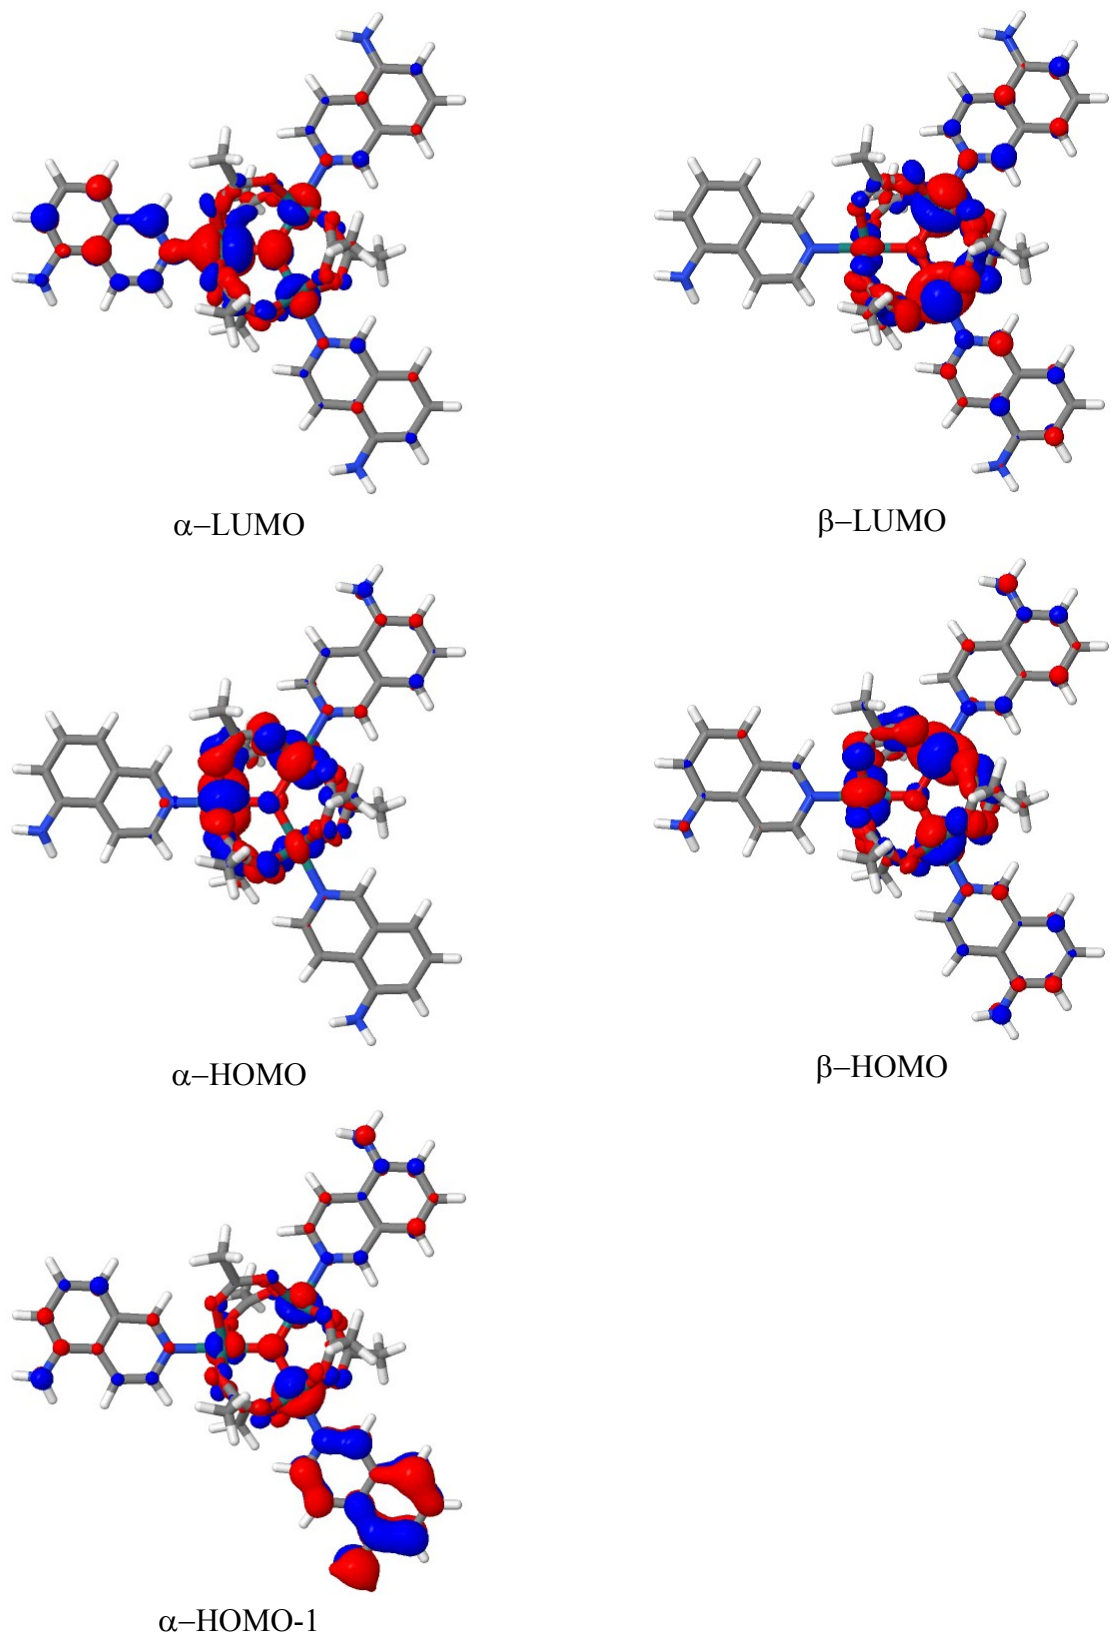

Figure S8. Plots of the frontier Kohn-Sham orbitals obtained with DFT using PBE0/def2-TZVP for the complex (5).



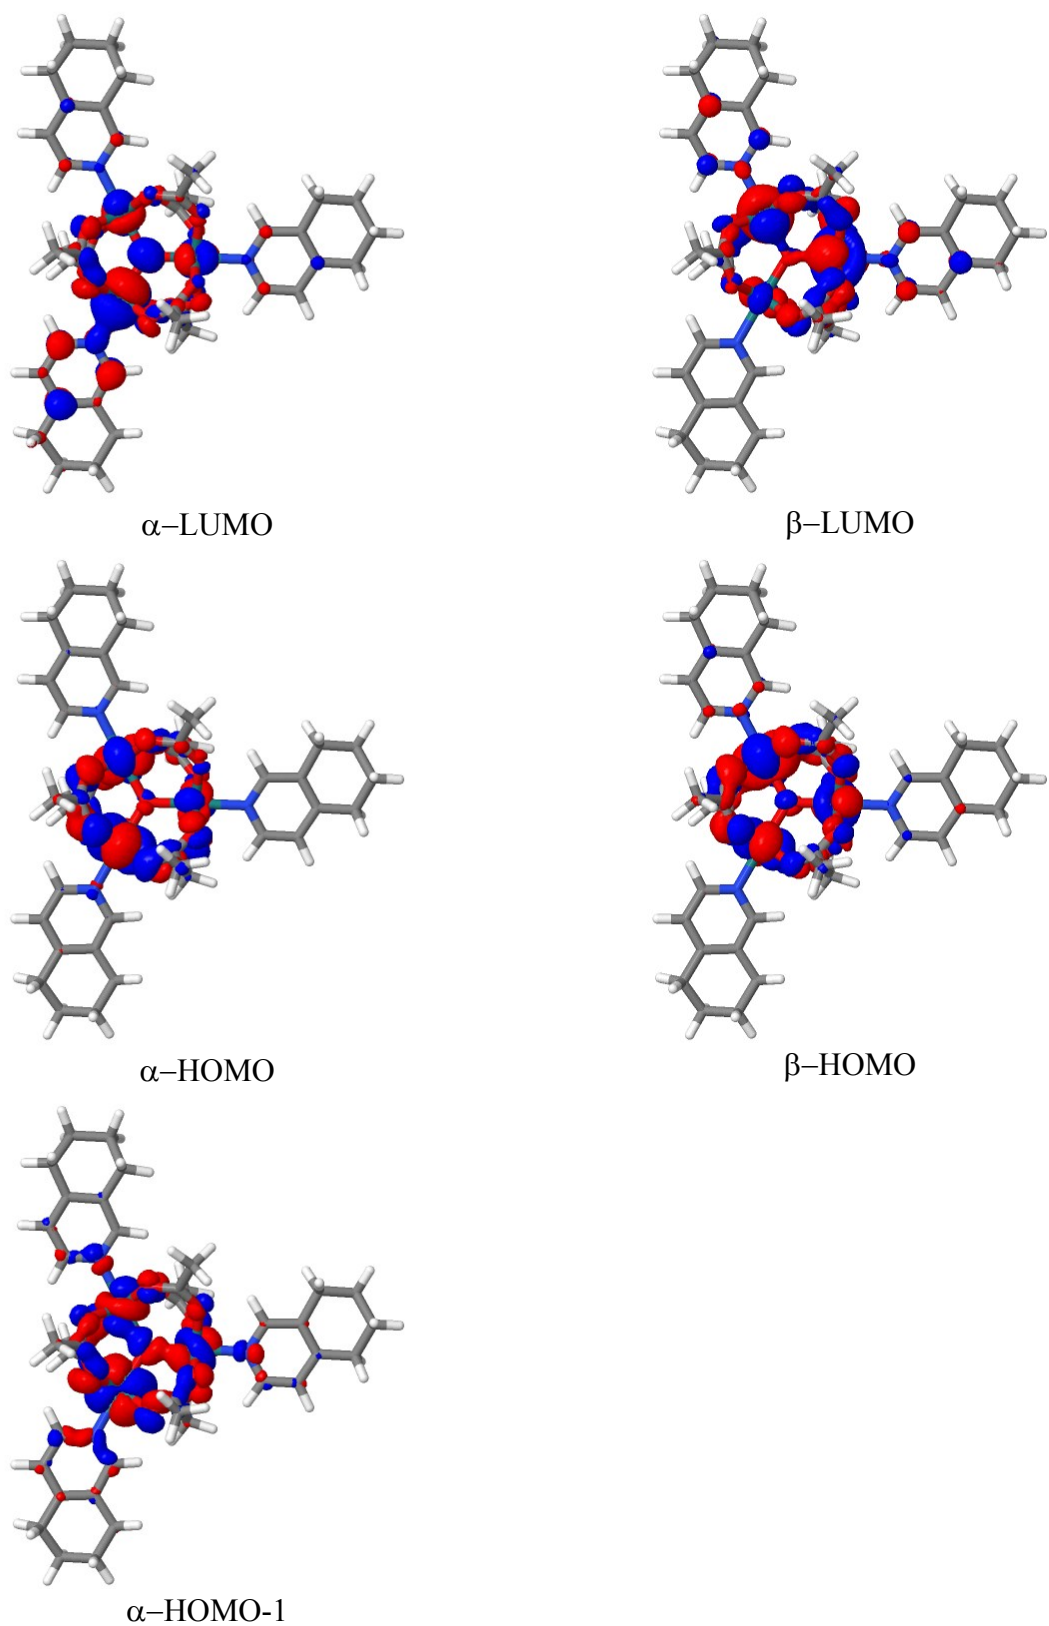

Figure S9. Plots of the frontier Kohn-Sham orbitals obtained with DFT using PBE0/def2-TZVP for the complex (6).

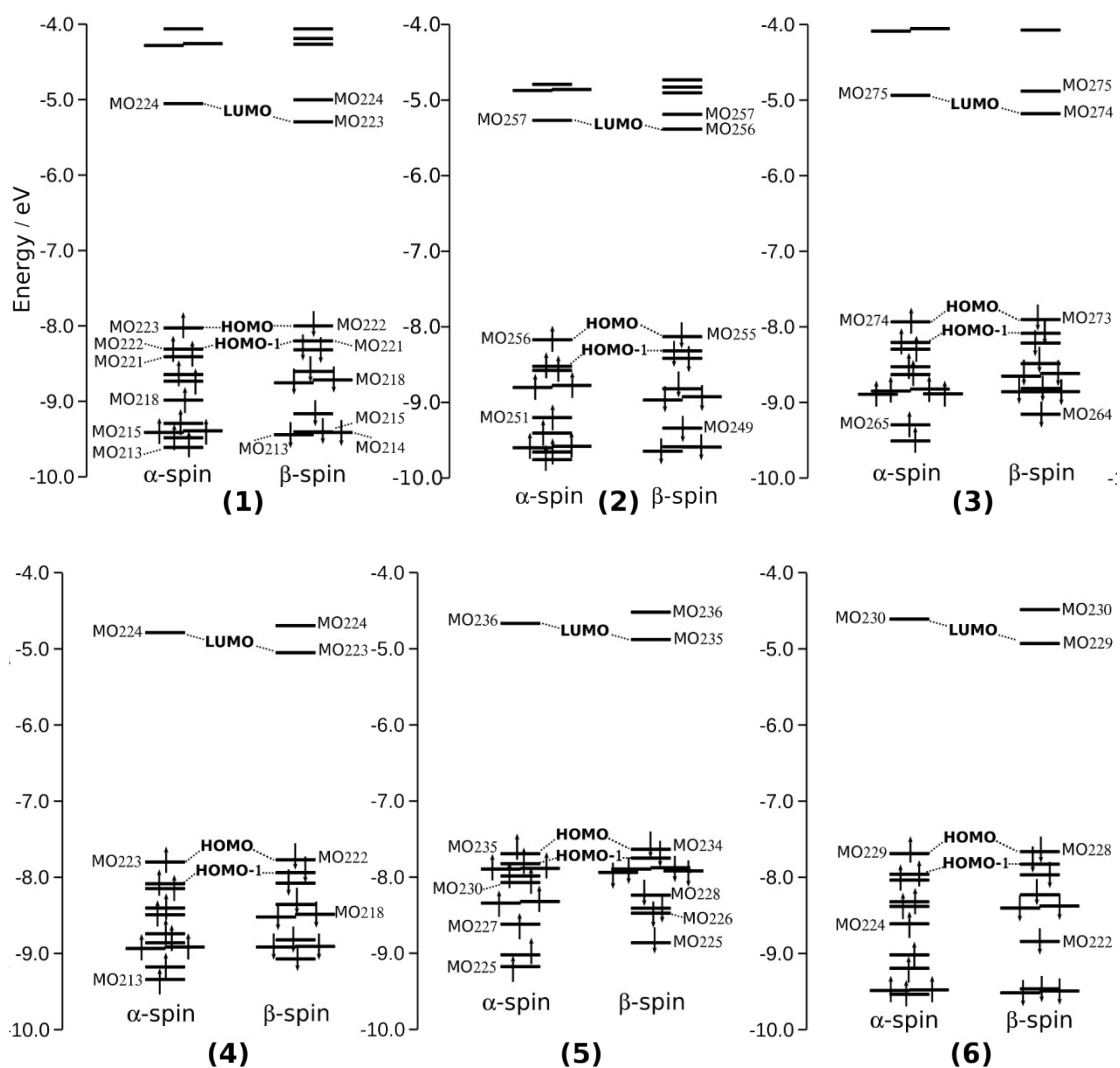

Figure S10. MO energy level obtained with DFT for complexes (1)-(6) using PBE0/def2-TZVP. The diagram highlights the two sets of orbitals and the numbers of the orbitals can be compared with the compositions in Tables S12-S17.

Table S12. Composition (%) of selected Kohn-Sham orbitals obtained for complex (1) with DFT using PBE0/def2-TZVP. Alpha (spin up) and beta (spin down) frontier KS orbitals are highlighted in bold.

| Alpha orbitals |               |             |                 |             |             | Beta orbitals |               |            |                 |             |             |
|----------------|---------------|-------------|-----------------|-------------|-------------|---------------|---------------|------------|-----------------|-------------|-------------|
| Orb. Nr.       | Energy (a.u.) | Oxo         | Ru <sub>3</sub> | L           | OAc         | Orb. Nr.      | Energy (a.u.) | Oxo        | Ru <sub>3</sub> | L           | OAc         |
| 213            | -0.353        | 1.2         | 63.2            | 29.2        | 26.5        | 213           | -0.347        | 1.3        | 13.3            | 79.6        | 5.9         |
| 214            | -0.349        | 1.2         | 28.3            | 57.9        | 12.7        | 214           | -0.346        | 0.1        | 0.5             | 98.3        | 1.1         |
| 215            | -0.346        | 0.1         | 8.3             | 88.4        | 3.3         | 215           | -0.346        | 0.2        | 0.9             | 97.8        | 1.2         |
| 216            | -0.345        | 0.0         | 1.2             | 97.7        | 1.0         | 216           | -0.337        | 4.4        | 59.5            | 18.2        | 18.0        |
| 217            | -0.342        | 1.2         | 45.5            | 38.5        | 14.9        | 217           | -0.322        | 7.1        | 68.0            | 12.7        | 12.3        |
| 218            | -0.330        | 6.0         | 60.0            | 21.7        | 12.4        | 218           | -0.320        | 4.0        | 71.3            | 6.7         | 18.0        |
| 219            | -0.321        | 7.1         | 71.4            | 9.0         | 12.4        | 219           | -0.316        | 5.7        | 65.7            | 16.8        | 11.7        |
| 220            | -0.318        | 6.7         | 68.6            | 7.0         | 17.8        | 220           | -0.306        | 2.5        | 77.4            | 6.4         | 13.7        |
| 221            | -0.309        | 6.0         | 63.7            | 11.3        | 19.1        | 221           | -0.301        | 5.3        | 69.6            | 7.9         | 17.3        |
| 222            | -0.305        | 3.1         | 75.8            | 8.1         | 12.9        | <b>222</b>    |               |            |                 |             |             |
|                |               |             |                 |             |             | <b>HOMO</b>   | <b>-0.294</b> | <b>0.5</b> | <b>72.5</b>     | <b>3.2</b>  | <b>23.8</b> |
| <b>223</b>     |               |             |                 |             |             | <b>223</b>    |               |            |                 |             |             |
| <b>HOMO</b>    | <b>-0.295</b> | <b>0.5</b>  | <b>71.2</b>     | <b>4.5</b>  | <b>23.8</b> | <b>LUMO</b>   | <b>-0.195</b> | <b>0.1</b> | <b>69.0</b>     | <b>14.1</b> | <b>16.8</b> |
| <b>224</b>     |               |             |                 |             |             |               |               |            |                 |             |             |
| <b>LUMO</b>    | <b>-0.186</b> | <b>11.8</b> | <b>55.1</b>     | <b>24.8</b> | <b>88.3</b> | 224           | -0.184        | 12.9       | 49.6            | 27.8        | 9.7         |
| 225            | -0.157        | 0.1         | 2.3             | 94.8        | 2.7         | 225           | -0.157        | 0.1        | 2.3             | 94.3        | 3.3         |
| 226            | -0.157        | 0.1         | 2.5             | 94.7        | 2.6         | 226           | -0.154        | 0.1        | 7.4             | 89.5        | 2.9         |
| 227            | -0.149        | 2.8         | 14.3            | 78.2        | 4.6         | 227           | -0.149        | 3.8        | 15.7            | 75.3        | 5.1         |
| 228            | -0.121        | 0.0         | 3.2             | 89.3        | 7.5         | 228           | -0.120        | 0.0        | 1.7             | 93.0        | 5.2         |
| 229            | -0.121        | 0.1         | 1.7             | 93.4        | 4.8         | 229           | -0.120        | 0.1        | 3.0             | 90.9        | 6.1         |
| 230            | -0.118        | 0.7         | 5.0             | 87.2        | 7.1         | 230           | -0.118        | 0.9        | 4.9             | 88.4        | 5.8         |
| 231            | -0.112        | 0.3         | 38.8            | 13.5        | 47.5        | 231           | -0.106        | 0.2        | 40.4            | 11.7        | 47.7        |
| 232            | -0.101        | 1.3         | 36.3            | 7.1         | 55.3        | 232           | -0.095        | 0.9        | 34.8            | 5.3         | 59.1        |
| 233            | -0.097        | 9.6         | 38.7            | 26.2        | 25.5        | 233           | -0.090        | 6.3        | 34.7            | 26.1        | 32.9        |
| 234            | -0.089        | 1.2         | 29.8            | 8.4         | 60.6        | 234           | -0.089        | 4.3        | 33.9            | 11.8        | 50.0        |

Table S13. Composition (%) of selected Kohn-Sham orbitals obtained for complex (2) with DFT using PBE0/def2-TZVP. Alpha (spin up) and beta (spin down) frontier KS orbitals are highlighted in bold.

| Alpha orbitals |               |             |                 |             |             | Beta orbitals |               |            |                 |             |             |
|----------------|---------------|-------------|-----------------|-------------|-------------|---------------|---------------|------------|-----------------|-------------|-------------|
| Orb. Nr.       | Energy (a.u.) | Oxo         | Ru <sub>3</sub> | L           | OAc         | Orb. Nr.      | Energy (a.u.) | Oxo        | Ru <sub>3</sub> | L           | OAc         |
| 246            | -0.359        | 1.0         | 57.6            | 17.6        | 23.8        | 246           | -0.355        | 1.8        | 15.3            | 75.1        | 7.8         |
| 247            | -0.355        | 1.0         | 21.2            | 66.7        | 11.1        | 247           | -0.353        | 0.3        | 0.8             | 97.6        | 1.3         |
| 248            | -0.353        | 0.2         | 8.2             | 87.9        | 3.7         | 248           | -0.352        | 0.0        | 1.0             | 97.0        | 2.0         |
| 249            | -0.352        | 0.1         | 1.4             | 96.9        | 1.6         | 249           | -0.343        | 5.6        | 55.6            | 20.7        | 18.1        |
| 250            | -0.346        | 1.6         | 52.1            | 28.3        | 17.9        | 250           | -0.330        | 2.9        | 65.6            | 15.7        | 15.8        |
| 251            | -0.338        | 6.8         | 70.1            | 19.7        | 13.5        | 251           | -0.328        | 6.3        | 66.2            | 16.3        | 11.1        |
| 252            | -0.324        | 8.7         | 67.5            | 11.3        | 12.5        | 252           | -0.324        | 5.7        | 70.9            | 10.6        | 12.9        |
| 253            | -0.323        | 4.8         | 67.9            | 9.3         | 18.0        | 253           | -0.309        | 4.9        | 74.7            | 6.5         | 14.0        |
| 254            | -0.315        | 7.4         | 63.5            | 11.3        | 17.8        | 254           | -0.306        | 4.7        | 66.7            | 13.7        | 14.9        |
|                |               |             |                 |             |             | <b>255</b>    |               |            |                 |             |             |
| 255            | -0.313        | 1.9         | 71.6            | 13.9        | 12.6        | <b>HOMO</b>   | <b>-0.299</b> | <b>0.6</b> | <b>69.9</b>     | <b>6.2</b>  | <b>23.4</b> |
| <b>256</b>     |               |             |                 |             |             | <b>256</b>    |               |            |                 |             |             |
| <b>HOMO</b>    | <b>-0.300</b> | <b>0.5</b>  | <b>65.4</b>     | <b>11.8</b> | <b>22.3</b> | <b>LUMO</b>   | <b>-0.198</b> | <b>0.3</b> | <b>62.8</b>     | <b>19.6</b> | <b>17.3</b> |
| <b>257</b>     |               |             |                 |             |             |               |               |            |                 |             |             |
| <b>LUMO</b>    | <b>-0.194</b> | <b>11.1</b> | <b>49.3</b>     | <b>32.6</b> | <b>6.9</b>  | 257           | -0.191        | 9.2        | 38.4            | 44.4        | 8.0         |
| 258            | -0.179        | 0.0         | 0.6             | 98.9        | 0.5         | 258           | -0.180        | 0.1        | 0.7             | 98.5        | 0.7         |
| 259            | -0.179        | 0.0         | 0.7             | 98.5        | 0.7         | 259           | -0.177        | 0.1        | 3.4             | 95.3        | 1.2         |
| 260            | -0.176        | 2.4         | 10.9            | 85.0        | 1.6         | 260           | -0.174        | 2.9        | 12.0            | 83.1        | 1.9         |
| 261            | -0.144        | 0.1         | 2.1             | 93.1        | 4.7         | 261           | -0.143        | 0.1        | 2.7             | 93.5        | 3.7         |
| 262            | -0.143        | 0.1         | 4.5             | 91.5        | 3.7         | 262           | -0.142        | 0.1        | 6.6             | 89.3        | 3.9         |
| 263            | -0.137        | 2.0         | 11.6            | 80.2        | 6.3         | 263           | -0.136        | 2.5        | 12.3            | 77.9        | 7.4         |
| 264            | -0.124        | 0.0         | 0.4             | 97.6        | 1.9         | 264           | -0.124        | 0.0        | 0.2             | 98.1        | 1.7         |
| 265            | -0.123        | 0.0         | 1.6             | 95.6        | 2.9         | 265           | -0.123        | 0.0        | 1.3             | 96.9        | 1.9         |
| 266            | -0.121        | 0.0         | 2.7             | 91.9        | 5.4         | 266           | -0.122        | 0.0        | 0.9             | 95.6        | 3.5         |
| 267            | -0.116        | 0.3         | 37.3            | 15.4        | 47.1        | 267           | -0.110        | 0.4        | 40.0            | 11.8        | 47.8        |
| 268            | -0.105        | 8.1         | 31.6            | 44.1        | 16.2        | 268           | -0.104        | 1.0        | 31.6            | 13.4        | 54.0        |
| 269            | -0.103        | 0.2         | 30.5            | 21.8        | 47.4        | 269           | -0.100        | 7.4        | 30.4            | 43.4        | 18.8        |
| 270            | -0.095        | 0.3         | 25.0            | 19.6        | 55.0        | 270           | -0.090        | 0.0        | 22.3            | 43.4        | 34.3        |

Table S14. Composition (%) of selected Kohn-Sham orbitals obtained for complex (3) with DFT using PBE0/def2-TZVP. Alpha (spin up) and beta (spin down) frontier KS orbitals are highlighted in bold.

| Alpha orbitals |               |             |                 |             |             | Beta orbitals |               |            |                 |             |             |
|----------------|---------------|-------------|-----------------|-------------|-------------|---------------|---------------|------------|-----------------|-------------|-------------|
| Orb. Nr.       | Energy (a.u.) | Oxo         | Ru <sub>3</sub> | L           | OAc         | Orb. Nr.      | Energy (a.u.) | Oxo        | Ru <sub>3</sub> | L           | OAc         |
| 264            | -0.350        | 1.1         | 66.1            | 5.5         | 27.3        | 264           | -0.337        | 5.0        | 59.4            | 15.7        | 20.0        |
| 265            | -0.342        | 2.1         | 63.8            | 10.3        | 23.9        | 265           | -0.326        | 0.3        | 4.4             | 93.4        | 1.8         |
| 266            | -0.327        | 5.4         | 52.4            | 31.9        | 10.3        | 266           | -0.326        | 0.0        | 0.8             | 98.0        | 1.2         |
| 267            | -0.327        | 3.3         | 29.1            | 61.0        | 6.6         | 267           | -0.324        | 0.5        | 12.1            | 83.9        | 3.6         |
| 268            | -0.325        | 0.2         | 2.7             | 95.7        | 1.4         | 268           | -0.318        | 7.5        | 69.0            | 11.9        | 11.6        |
| 269            | -0.324        | 0.7         | 8.0             | 88.9        | 2.3         | 269           | -0.317        | 3.6        | 68.7            | 10.0        | 17.7        |
| 270            | -0.317        | 6.7         | 72.8            | 7.8         | 12.6        | 270           | -0.312        | 6.5        | 71.0            | 10.3        | 12.1        |
| 271            | -0.313        | 6.1         | 64.0            | 12.9        | 17.0        | 271           | -0.302        | 2.0        | 77.1            | 17.3        | 13.5        |
| 272            | -0.305        | 6.0         | 63.3            | 11.7        | 18.9        | 272           | -0.297        | 5.2        | 68.4            | 9.3         | 17.2        |
|                |               |             |                 |             |             | <b>273</b>    |               |            |                 |             |             |
| 273            | -0.302        | 3.0         | 72.2            | 12.7        | 12.1        | <b>HOMO</b>   | <b>-0.291</b> | <b>0.4</b> | <b>66.5</b>     | <b>11.5</b> | <b>21.6</b> |
| <b>274</b>     |               |             |                 |             |             | <b>274</b>    |               |            |                 |             |             |
| <b>HOMO</b>    | <b>-0.292</b> | <b>0.5</b>  | <b>66.7</b>     | <b>10.9</b> | <b>22.0</b> | <b>LUMO</b>   | <b>-0.190</b> | <b>0.1</b> | <b>69.2</b>     | <b>14.1</b> | <b>16.5</b> |
| <b>275</b>     |               |             |                 |             |             |               |               |            |                 |             |             |
| <b>LUMO</b>    | <b>-0.181</b> | <b>11.9</b> | <b>55.4</b>     | <b>24.3</b> | <b>38.4</b> | 275           | -0.179        | 13.0       | 49.7            | 27.7        | 9.6         |
| 276            | -0.150        | 0.1         | 2.2             | 95.6        | 2.2         | 276           | -0.150        | 0.1        | 2.1             | 95.3        | 2.5         |
| 277            | -0.149        | 0.1         | 2.3             | 95.8        | 1.8         | 277           | -0.147        | 0.1        | 6.5             | 91.3        | 2.2         |
| 278            | -0.143        | 2.3         | 12.1            | 82.2        | 3.4         | 278           | -0.143        | 3.1        | 12.9            | 80.3        | 3.8         |
| 279            | -0.121        | 0.0         | 1.8             | 93.3        | 4.8         | 279           | -0.121        | 0.1        | 1.2             | 93.9        | 4.9         |
| 280            | -0.121        | 0.1         | 1.2             | 94.3        | 4.4         | 280           | -0.120        | 0.1        | 2.1             | 93.1        | 4.8         |
| 281            | -0.118        | 0.8         | 4.6             | 87.8        | 6.8         | 281           | -0.118        | 1.0        | 5.1             | 88.3        | 5.6         |
| 282            | -0.108        | 0.2         | 38.1            | 14.8        | 46.8        | 282           | -0.101        | 0.2        | 40.4            | 11.1        | 48.3        |
| 283            | -0.097        | 1.2         | 32.0            | 14.7        | 52.0        | 283           | -0.090        | 1.0        | 32.5            | 9.6         | 56.9        |
| 284            | -0.093        | 7.2         | 28.6            | 45.9        | 18.3        | 284           | -0.087        | 3.3        | 22.8            | 45.9        | 28.0        |
| 285            | -0.083        | 0.7         | 26.3            | 16.6        | 56.4        | 285           | -0.085        | 4.5        | 26.9            | 33.2        | 35.4        |

Table S15. Composition (%) of selected Kohn-Sham orbitals obtained for complex (4) with DFT using PBE0/def2-TZVP. Alpha (spin up) and beta (spin down) frontier KS orbitals are highlighted in bold.

| Alpha orbitals |               |             |                 |             |             | Beta orbitals |               |            |                 |             |             |
|----------------|---------------|-------------|-----------------|-------------|-------------|---------------|---------------|------------|-----------------|-------------|-------------|
| Orb. Nr.       | Energy (a.u.) | Oxo         | Ru <sub>3</sub> | L           | OAc         | Orb. Nr.      | Energy (a.u.) | Oxo        | Ru <sub>3</sub> | L           | OAc         |
| 213            | -0.343        | 1.2         | 63.6            | 8.5         | 26.7        | 213           | -0.333        | 4.3        | 44.0            | 36.2        | 15.6        |
| 214            | -0.337        | 2.2         | 58.8            | 17.4        | 21.7        | 214           | -0.328        | 0.1        | 1.3             | 97.2        | 1.4         |
| 215            | -0.328        | 0.7         | 9.0             | 87.2        | 3.1         | 215           | -0.327        | 0.1        | 3.3             | 94.3        | 2.4         |
| 216            | -0.328        | 0.1         | 1.0             | 97.5        | 1.4         | 216           | -0.324        | 2.2        | 33.9            | 54.4        | 9.6         |
| 217            | -0.326        | 0.6         | 14.1            | 81.0        | 4.3         | 217           | -0.313        | 6.5        | 67.9            | 12.8        | 12.7        |
| 218            | -0.321        | 7.1         | 69.4            | 9.9         | 13.5        | 218           | -0.312        | 4.9        | 68.9            | 9.8         | 16.3        |
| 219            | -0.312        | 6.8         | 72.3            | 8.1         | 12.8        | 219           | -0.307        | 6.3        | 71.6            | 9.9         | 12.3        |
| 220            | -0.309        | 6.6         | 66.0            | 10.4        | 17.0        | 220           | -0.297        | 2.1        | 78.6            | 5.4         | 13.9        |
| 221            | -0.299        | 5.8         | 64.1            | 10.7        | 19.4        | 221           | -0.292        | 4.7        | 69.9            | 7.0         | 18.4        |
| 222            | -0.297        | 2.9         | 73.3            | 11.5        | 12.2        | <b>222</b>    |               |            |                 |             |             |
|                |               |             |                 |             |             | <b>HOMO</b>   | <b>-0.286</b> | <b>0.5</b> | <b>70.0</b>     | <b>6.9</b>  | <b>22.6</b> |
| <b>223</b>     |               |             |                 |             |             | <b>223</b>    |               |            |                 |             |             |
| <b>HOMO</b>    | <b>-0.287</b> | <b>0.4</b>  | <b>69.3</b>     | <b>7.3</b>  | <b>22.9</b> | <b>LUMO</b>   | <b>-0.186</b> | <b>0.1</b> | <b>70.2</b>     | <b>13.6</b> | <b>16.2</b> |
| <b>224</b>     |               |             |                 |             |             |               |               |            |                 |             |             |
| <b>LUMO</b>    | <b>-0.176</b> | <b>12.2</b> | <b>57.5</b>     | <b>21.8</b> | <b>8.5</b>  | 224           | -0.173        | 13.1       | 50.6            | 26.5        | 9.8         |
| 225            | -0.141        | 0.1         | 2.3             | 94.9        | 2.6         | 225           | -0.141        | 0.1        | 2.3             | 94.5        | 3.0         |
| 226            | -0.140        | 0.1         | 2.5             | 95.4        | 2.0         | 226           | -0.137        | 0.0        | 6.7             | 90.9        | 2.4         |
| 227            | -0.134        | 2.1         | 11.4            | 82.6        | 3.9         | 227           | -0.134        | 3.0        | 12.7            | 80.0        | 4.3         |
| 228            | -0.112        | 0.0         | 2.9             | 89.8        | 7.2         | 228           | -0.112        | 0.1        | 1.4             | 92.1        | 6.3         |
| 229            | -0.111        | 0.1         | 1.6             | 93.6        | 4.7         | 229           | -0.110        | 0.0        | 2.7             | 91.8        | 5.4         |
| 230            | -0.109        | 0.6         | 4.6             | 86.8        | 8.1         | 230           | -0.109        | 0.8        | 4.5             | 88.6        | 6.1         |
| 231            | -0.103        | 0.3         | 37.8            | 15.6        | 46.4        | 231           | -0.097        | 0.3        | 39.5            | 12.1        | 48.1        |
| 232            | -0.092        | 1.2         | 33.7            | 9.7         | 55.4        | 232           | -0.086        | 1.0        | 32.0            | 10.2        | 57.0        |
| 233            | -0.088        | 8.4         | 35.3            | 32.0        | 24.2        | 233           | -0.082        | 6.0        | 29.6            | 37.3        | 27.1        |
| 234            | -0.081        | 1.3         | 27.2            | 15.4        | 56.1        | 234           | -0.081        | 3.0        | 31.0            | 15.1        | 50.9        |

Table S16. Composition (%) of selected Kohn-Sham orbitals obtained for complex (5) with DFT using PBE0/def2-TZVP. Alpha (spin up) and beta (spin down) frontier KS orbitals are highlighted in bold.

| Alpha orbitals |               |             |                 |             |             | Beta orbitals |               |            |                 |             |             |
|----------------|---------------|-------------|-----------------|-------------|-------------|---------------|---------------|------------|-----------------|-------------|-------------|
| Orb. Nr.       | Energy (a.u.) | Oxo         | Ru <sub>3</sub> | L           | OAc         | Orb. Nr.      | Energy (a.u.) | Oxo        | Ru <sub>3</sub> | L           | OAc         |
| 225            | -0.337        | 1.0         | 63.2            | 9.8         | 26.0        | 225           | -0.326        | 6.3        | 62.9            | 10.7        | 20.2        |
| 226            | -0.332        | 2.5         | 66.0            | 8.6         | 22.9        | 226           | -0.311        | 2.9        | 71.2            | 7.8         | 18.1        |
| 227            | -0.317        | 6.2         | 58.6            | 24.3        | 10.8        | 227           | -0.309        | 7.5        | 65.8            | 16.7        | 10.0        |
| 228            | -0.307        | 5.0         | 60.6            | 22.6        | 11.8        | 228           | -0.303        | 5.5        | 59.6            | 24.6        | 10.2        |
| 229            | -0.306        | 9.7         | 61.3            | 15.4        | 13.6        | 229           | -0.292        | 2.6        | 41.6            | 46.1        | 19.7        |
| 230            | -0.297        | 3.1         | 57.4            | 19.4        | 20.1        | 230           | -0.291        | 0.8        | 32.5            | 60.1        | 16.6        |
| 231            | -0.294        | 2.7         | 77.2            | 7.3         | 12.7        | 231           | -0.290        | 0.3        | 10.4            | 87.1        | 12.2        |
| 232            | -0.290        | 0.1         | 2.4             | 96.5        | 1.0         | 232           | -0.290        | 0.6        | 18.0            | 77.4        | 3.9         |
| 233            | -0.290        | 0.3         | 0.9             | 98.2        | 0.6         | 233           | -0.285        | 2.9        | 42.7            | 42.5        | 11.8        |
| 234            | -0.288        | 1.1         | 7.6             | 89.1        | 12.2        | <b>234</b>    |               |            |                 |             |             |
|                |               |             |                 |             |             | <b>HOMO</b>   | <b>-0.281</b> | <b>0.6</b> | <b>56.8</b>     | <b>24.3</b> | <b>18.3</b> |
| <b>235</b>     |               |             |                 |             |             | <b>235</b>    |               |            |                 |             |             |
| <b>HOMO</b>    | <b>-0.283</b> | <b>0.5</b>  | <b>57.2</b>     | <b>23.6</b> | <b>18.7</b> | <b>LUMO</b>   | <b>-0.179</b> | <b>0.3</b> | <b>68.2</b>     | <b>15.4</b> | <b>16.1</b> |
| <b>236</b>     |               |             |                 |             |             |               |               |            |                 |             |             |
| <b>LUMO</b>    | <b>-0.172</b> | <b>12.8</b> | <b>58.6</b>     | <b>20.3</b> | <b>8.4</b>  | 236           | -0.166        | 12.9       | 52.8            | 24.0        | 10.3        |
| 237            | -0.131        | 0.1         | 2.9             | 95.2        | 1.9         | 237           | -0.131        | 0.1        | 2.7             | 94.6        | 2.5         |
| 238            | -0.129        | 0.1         | 4.1             | 93.0        | 2.8         | 238           | -0.127        | 0.0        | 7.8             | 89.9        | 2.3         |
| 239            | -0.124        | 1.4         | 9.4             | 86.8        | 2.5         | 239           | -0.124        | 1.8        | 9.8             | 85.7        | 2.8         |
| 240            | -0.105        | 0.0         | 1.0             | 94.8        | 4.1         | 240           | -0.105        | 0.1        | 0.9             | 95.9        | 3.2         |
| 241            | -0.103        | 0.1         | 1.4             | 95.1        | 3.3         | 241           | -0.103        | 0.1        | 1.7             | 94.8        | 3.5         |
| 242            | -0.103        | 0.3         | 3.4             | 90.7        | 5.4         | 242           | -0.102        | 0.5        | 2.4             | 92.1        | 4.9         |
| 243            | -0.096        | 0.3         | 37.5            | 17.3        | 45.0        | 243           | -0.092        | 0.2        | 38.6            | 12.8        | 48.4        |
| 244            | -0.086        | 7.2         | 25.8            | 56.3        | 10.8        | 244           | -0.082        | 2.9        | 28.7            | 34.0        | 34.4        |
| 245            | -0.084        | 0.2         | 29.0            | 18.4        | 52.4        | 245           | -0.079        | 4.8        | 24.8            | 46.8        | 23.6        |
| 246            | -0.075        | 0.3         | 30.7            | 6.1         | 62.9        | 246           | -0.072        | 0.1        | 24.2            | 26.7        | 49.1        |

Table S17. Composition (%) of selected Kohn-Sham orbitals obtained for complex (6) with DFT using PBE0/def2-TZVP. Alpha (spin up) and beta (spin down) frontier KS orbitals are highlighted in bold.

| Alpha orbitals |               |             |                 |             |            | Beta orbitals |               |            |                 |             |             |
|----------------|---------------|-------------|-----------------|-------------|------------|---------------|---------------|------------|-----------------|-------------|-------------|
| Orb. Nr.       | Energy (a.u.) | Oxo         | Ru <sub>3</sub> | L           | OAc        | Orb. Nr.      | Energy (a.u.) | Oxo        | Ru <sub>3</sub> | L           | OAc         |
| 219            | -0.350        | 0.1         | 3.4             | 93.0        | 3.5        | 219           | -0.350        | 0.2        | 0.8             | 96.7        | 2.2         |
| 220            | -0.349        | 0.0         | 0.9             | 96.4        | 2.7        | 220           | -0.349        | 0.0        | 0.4             | 96.1        | 3.5         |
| 221            | -0.348        | 0.1         | 1.1             | 95.6        | 3.2        | 221           | -0.348        | 0.1        | 0.6             | 97.2        | 2.1         |
| 222            | -0.338        | 1.2         | 63.6            | 9.0         | 26.3       | 222           | -0.325        | 5.5        | 66.1            | 8.7         | 19.7        |
| 223            | -0.331        | 2.2         | 66.9            | 8.3         | 22.7       | 223           | -0.309        | 5.4        | 72.4            | 5.9         | 16.3        |
| 224            | -0.316        | 7.4         | 70.7            | 8.3         | 13.6       | 224           | -0.308        | 7.0        | 71.6            | 7.4         | 14.0        |
| 225            | -0.308        | 6.9         | 72.8            | 7.3         | 13.0       | 225           | -0.302        | 6.5        | 73.2            | 7.9         | 12.4        |
| 226            | -0.306        | 7.9         | 69.5            | 6.1         | 16.6       | 226           | -0.293        | 1.9        | 78.8            | 5.0         | 14.3        |
| 227            | -0.295        | 5.1         | 68.7            | 4.4         | 21.8       | 227           | -0.288        | 4.0        | 72.0            | 4.4         | 19.6        |
|                |               |             |                 |             |            | <b>228</b>    |               |            |                 |             |             |
| 228            | -0.293        | 3.2         | 77.4            | 6.6         | 12.9       | <b>HOMO</b>   | <b>-0.282</b> | <b>0.6</b> | <b>72.5</b>     | <b>3.5</b>  | <b>23.3</b> |
|                |               |             |                 |             |            | <b>229</b>    |               |            |                 |             |             |
| <b>229</b>     |               |             |                 |             |            | <b>LUMO</b>   | <b>-0.181</b> | <b>0.1</b> | <b>71.9</b>     | <b>12.2</b> | <b>15.9</b> |
| <b>230</b>     |               |             |                 |             |            |               |               |            |                 |             |             |
| <b>LUMO</b>    | <b>-0.169</b> | <b>12.6</b> | <b>60.2</b>     | <b>18.5</b> | <b>8.8</b> | 230           | -0.165        | 14.3       | 54.7            | 20.6        | 10.4        |
| 231            | -0.114        | 0.2         | 3.6             | 91.2        | 5.0        | 231           | -0.114        | 0.1        | 3.8             | 89.0        | 7.1         |
| 232            | -0.113        | 0.1         | 5.9             | 90.1        | 4.0        | 232           | -0.110        | 0.1        | 7.8             | 88.1        | 4.0         |
| 233            | -0.107        | 1.0         | 8.2             | 80.6        | 10.2       | 233           | -0.106        | 1.5        | 9.1             | 81.5        | 7.9         |
| 234            | -0.101        | 0.2         | 32.8            | 24.4        | 42.6       | 234           | -0.096        | 0.1        | 20.8            | 49.7        | 29.4        |
| 235            | -0.093        | 0.1         | 3.1             | 89.0        | 7.9        | 235           | -0.094        | 0.1        | 4.7             | 86.5        | 8.7         |
| 236            | -0.093        | 0.1         | 2.9             | 86.3        | 10.7       | 236           | -0.092        | 0.1        | 4.0             | 86.0        | 9.9         |
| 237            | -0.091        | 0.2         | 5.4             | 85.6        | 8.9        | 237           | -0.090        | 0.2        | 14.7            | 65.1        | 20.0        |
| 238            | -0.088        | 1.2         | 33.5            | 9.0         | 56.3       | 238           | -0.081        | 1.0        | 31.4            | 7.8         | 59.8        |
| 239            | -0.084        | 8.2         | 35.2            | 33.7        | 22.9       | 239           | -0.078        | 5.7        | 30.1            | 31.1        | 33.1        |
| 240            | -0.077        | 1.4         | 30.1            | 6.8         | 61.8       | 240           | -0.077        | 3.7        | 32.7            | 15.3        | 48.3        |



*NMR Spectroscopy*

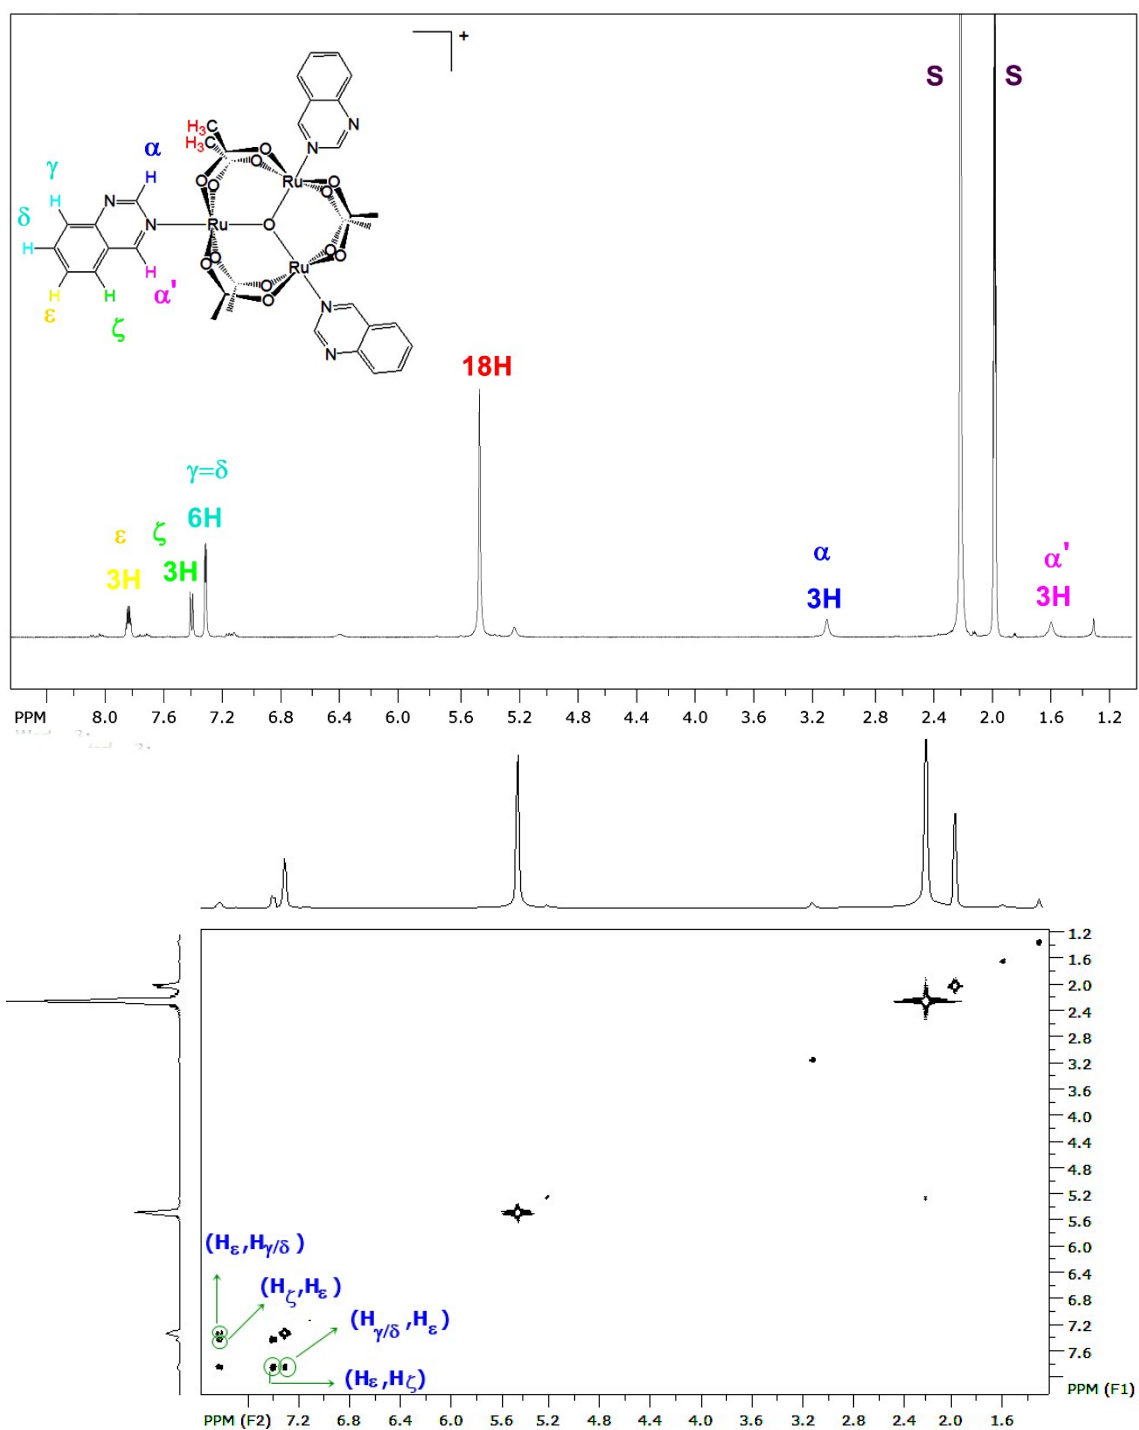

**Figure S11.** <sup>1</sup>H-NMR and COSY spectra of complex **1**, obtained from 10 mM acetonitrile-d<sub>3</sub> solution.

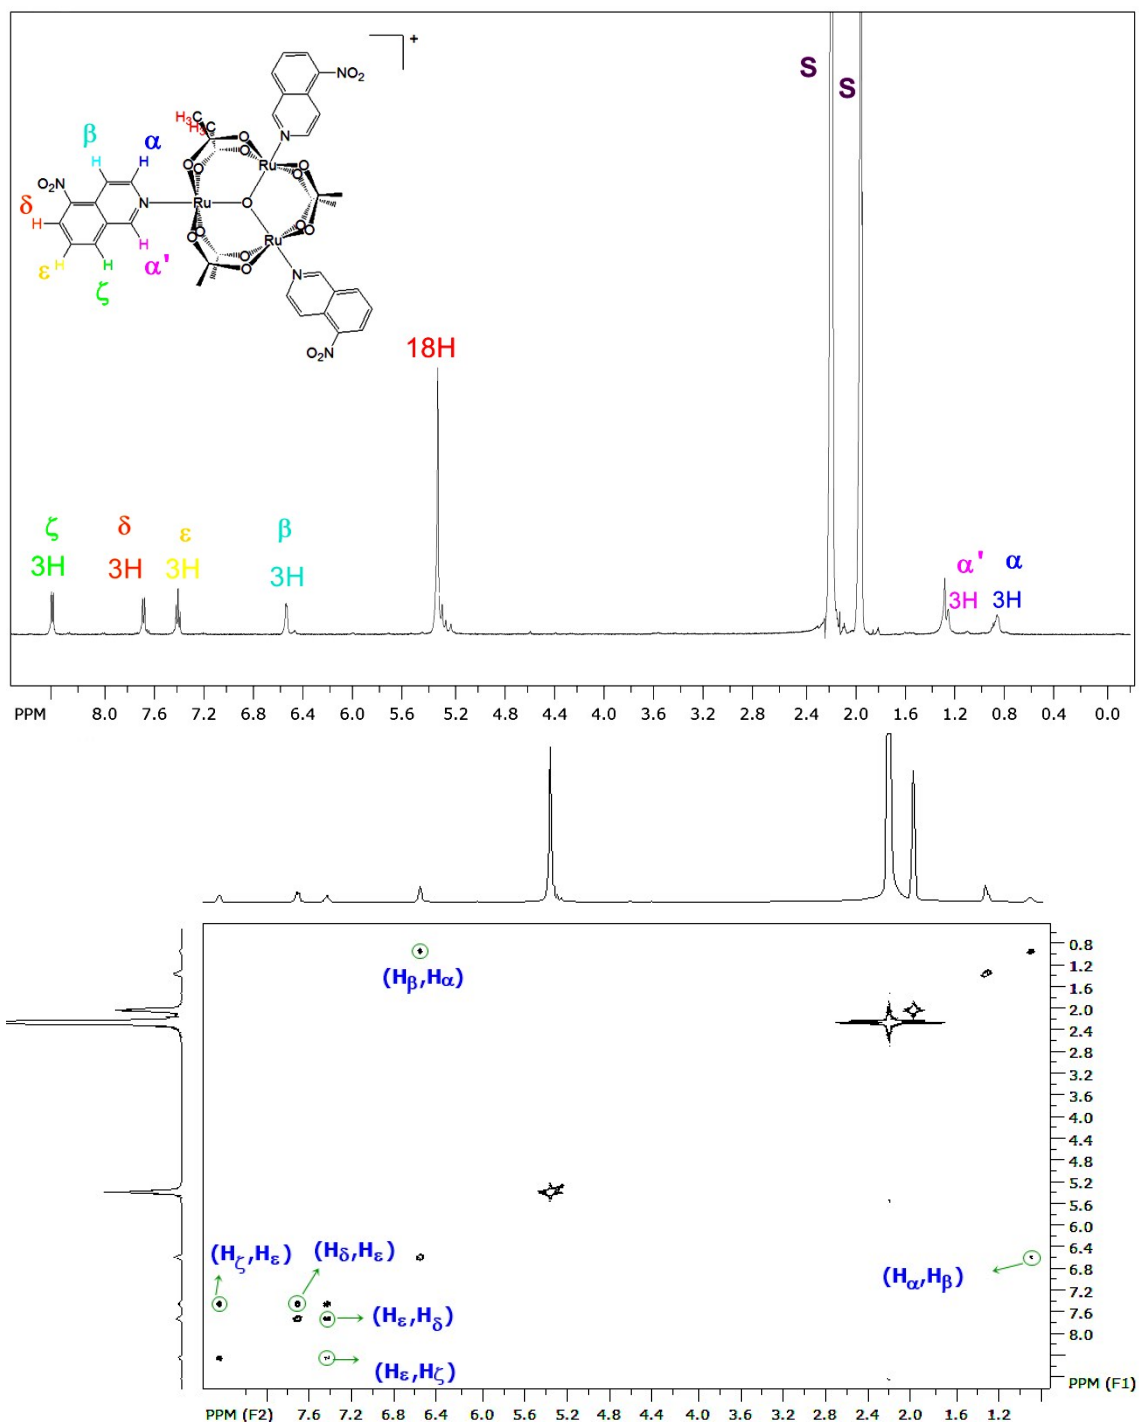

**Figure S12.**  $^1\text{H-NMR}$  and COSY spectra of complex **2**, obtained from a 1 mM acetonitrile- $\text{d}_3$  solution.

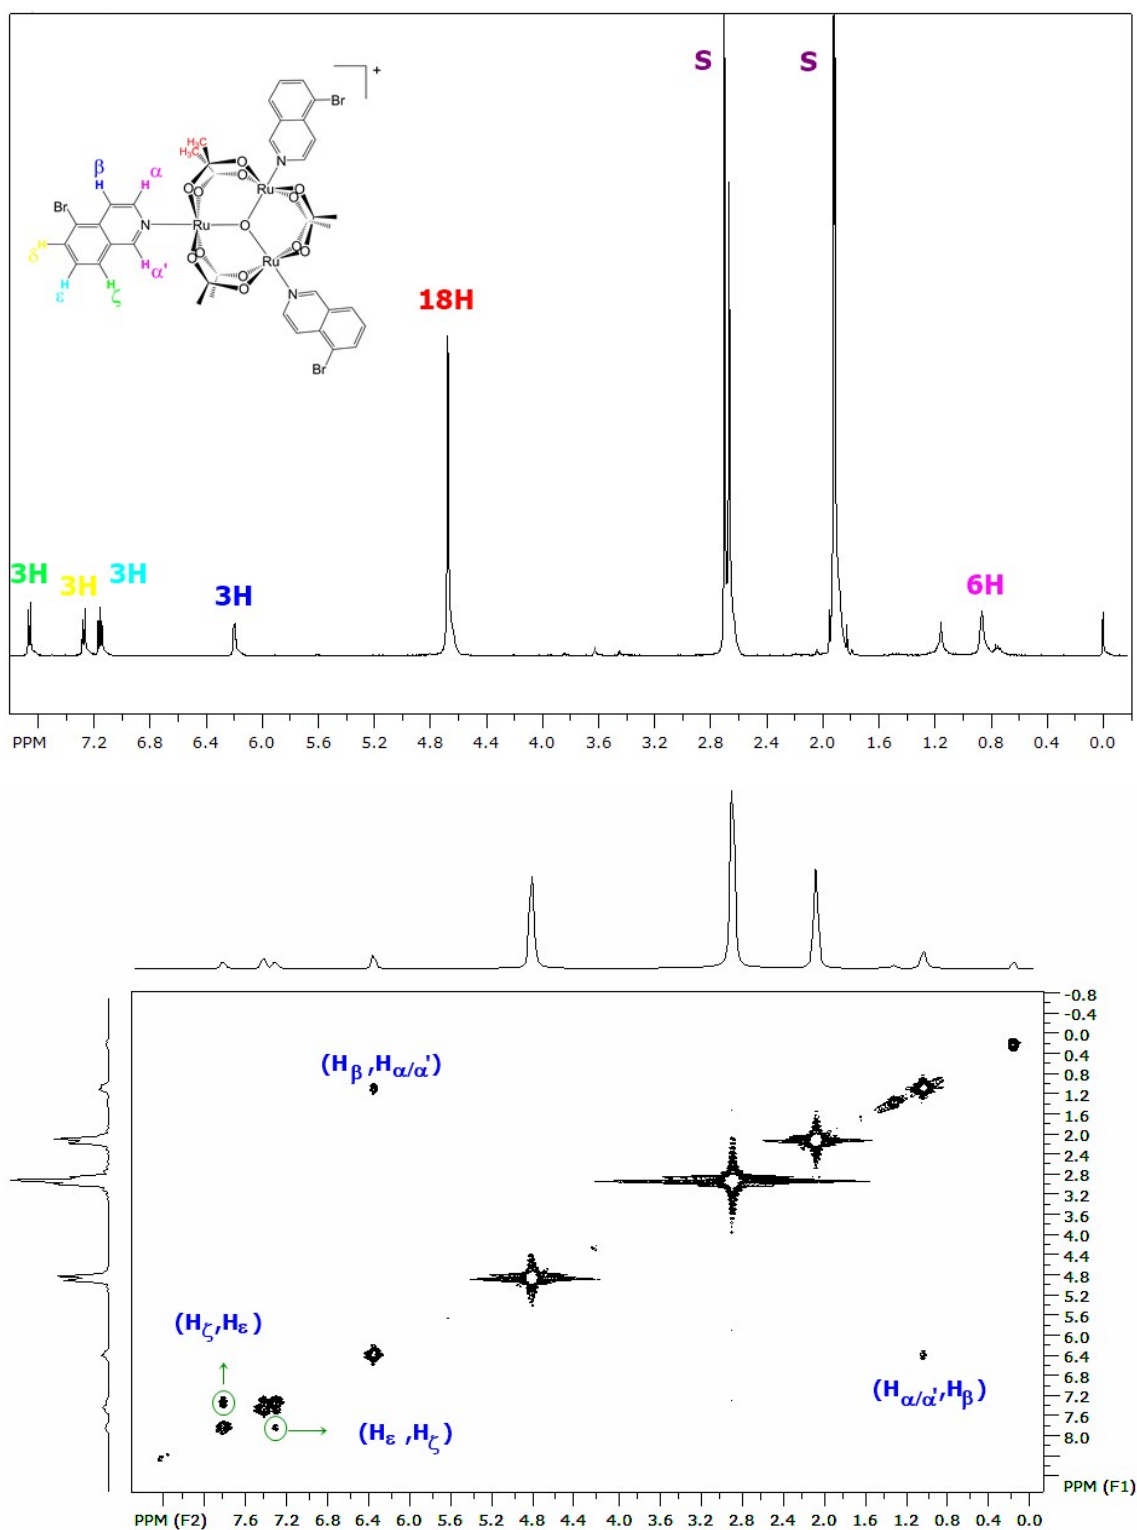

**Figure S13.** <sup>1</sup>H-NMR and COSY spectra of complex 3 obtained from a 10 mM chloroform-d solution.

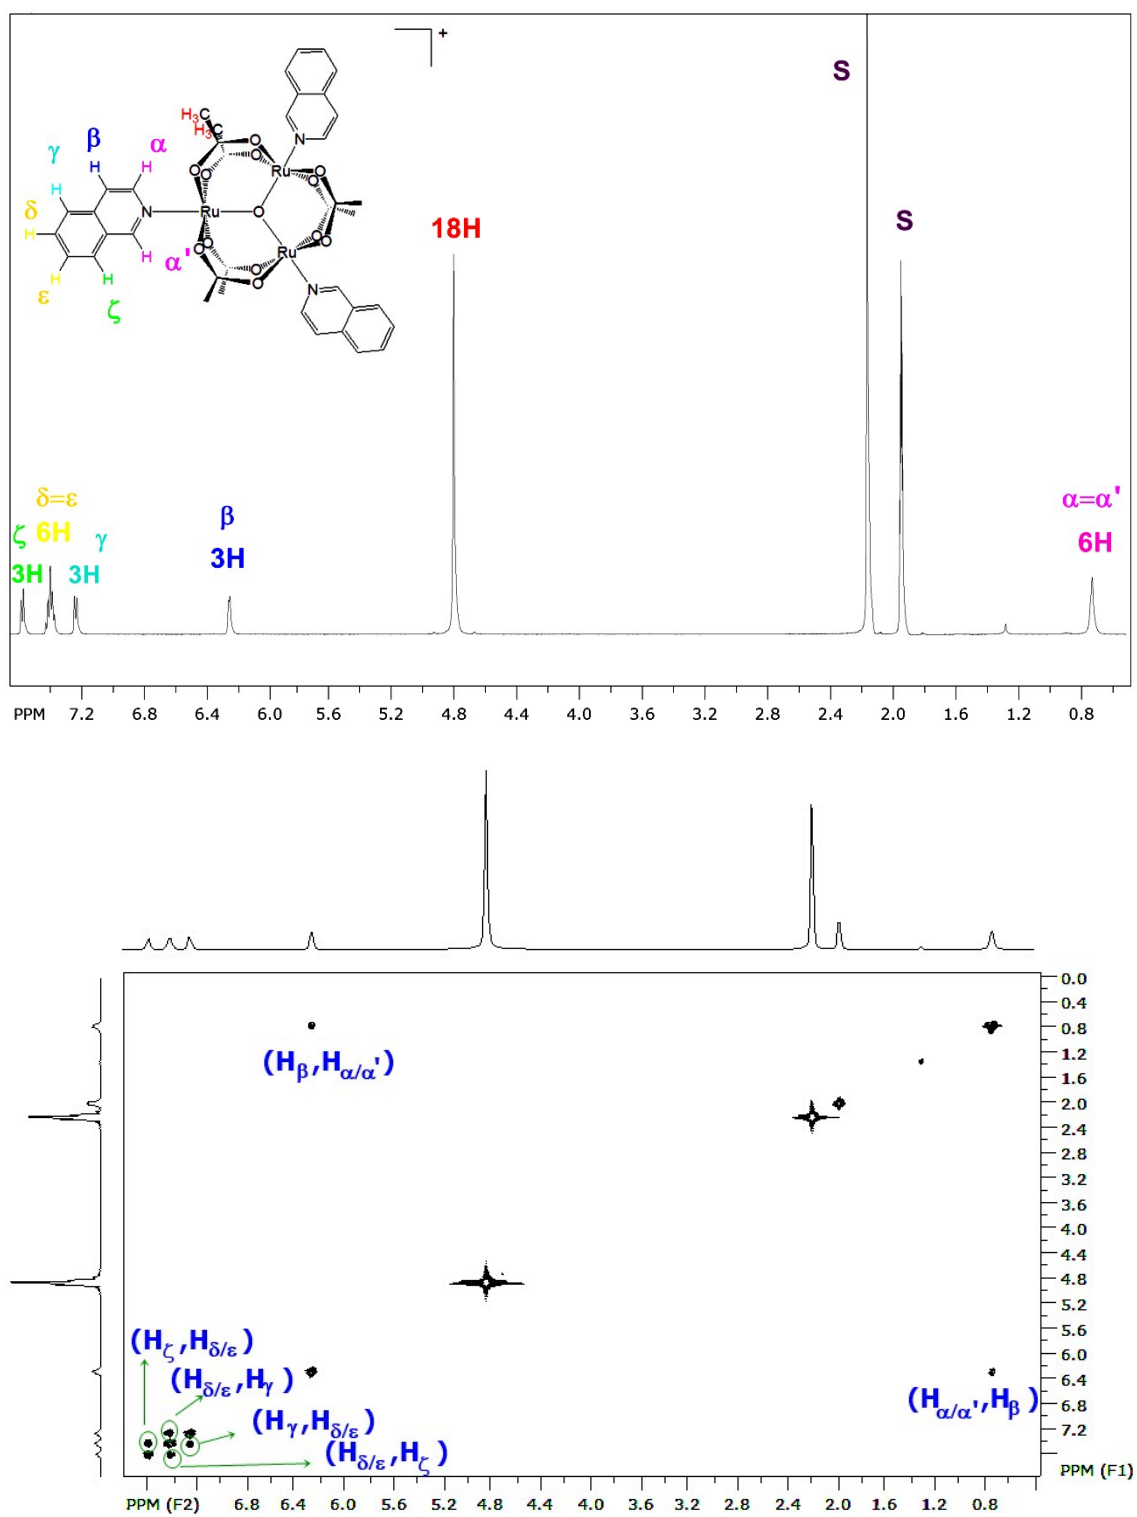

**Figure S14.**  $^1\text{H-NMR}$  and COSY spectra of complex 4, obtained from a 10 mM acetonitrile- $\text{d}_3$  solution.

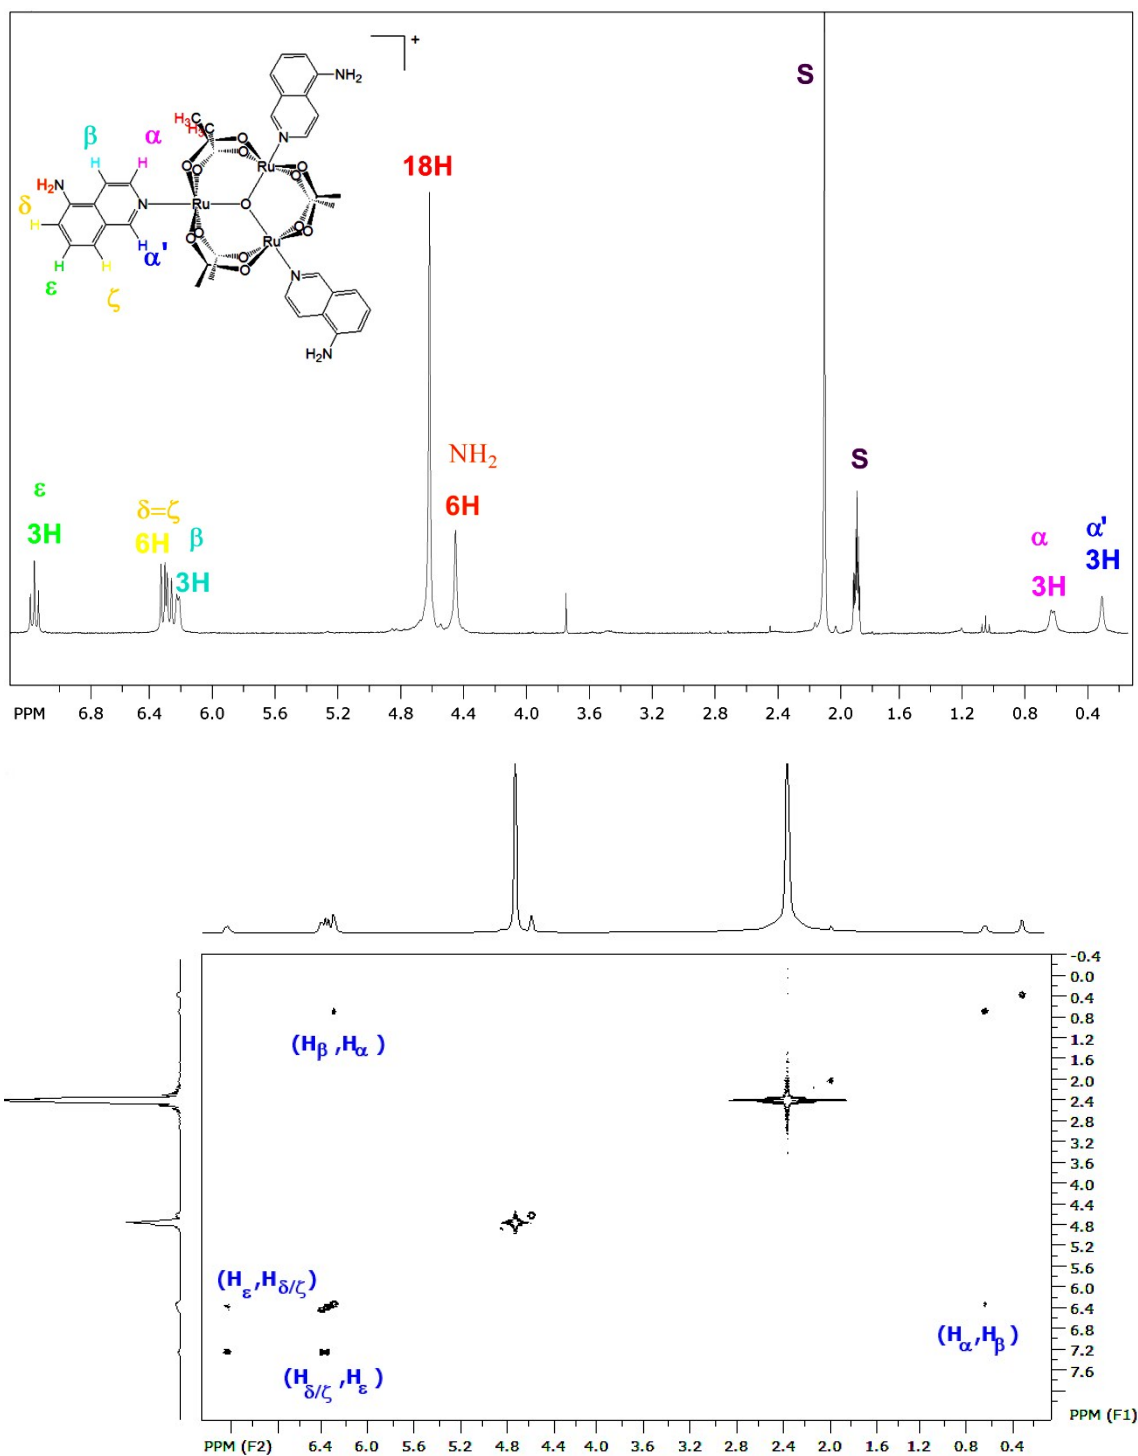

**Figure S15.**  $^1\text{H-NMR}$  and COSY spectra of complex **5**, obtained from a 10 mM acetonitrile- $\text{d}_3$  solution.

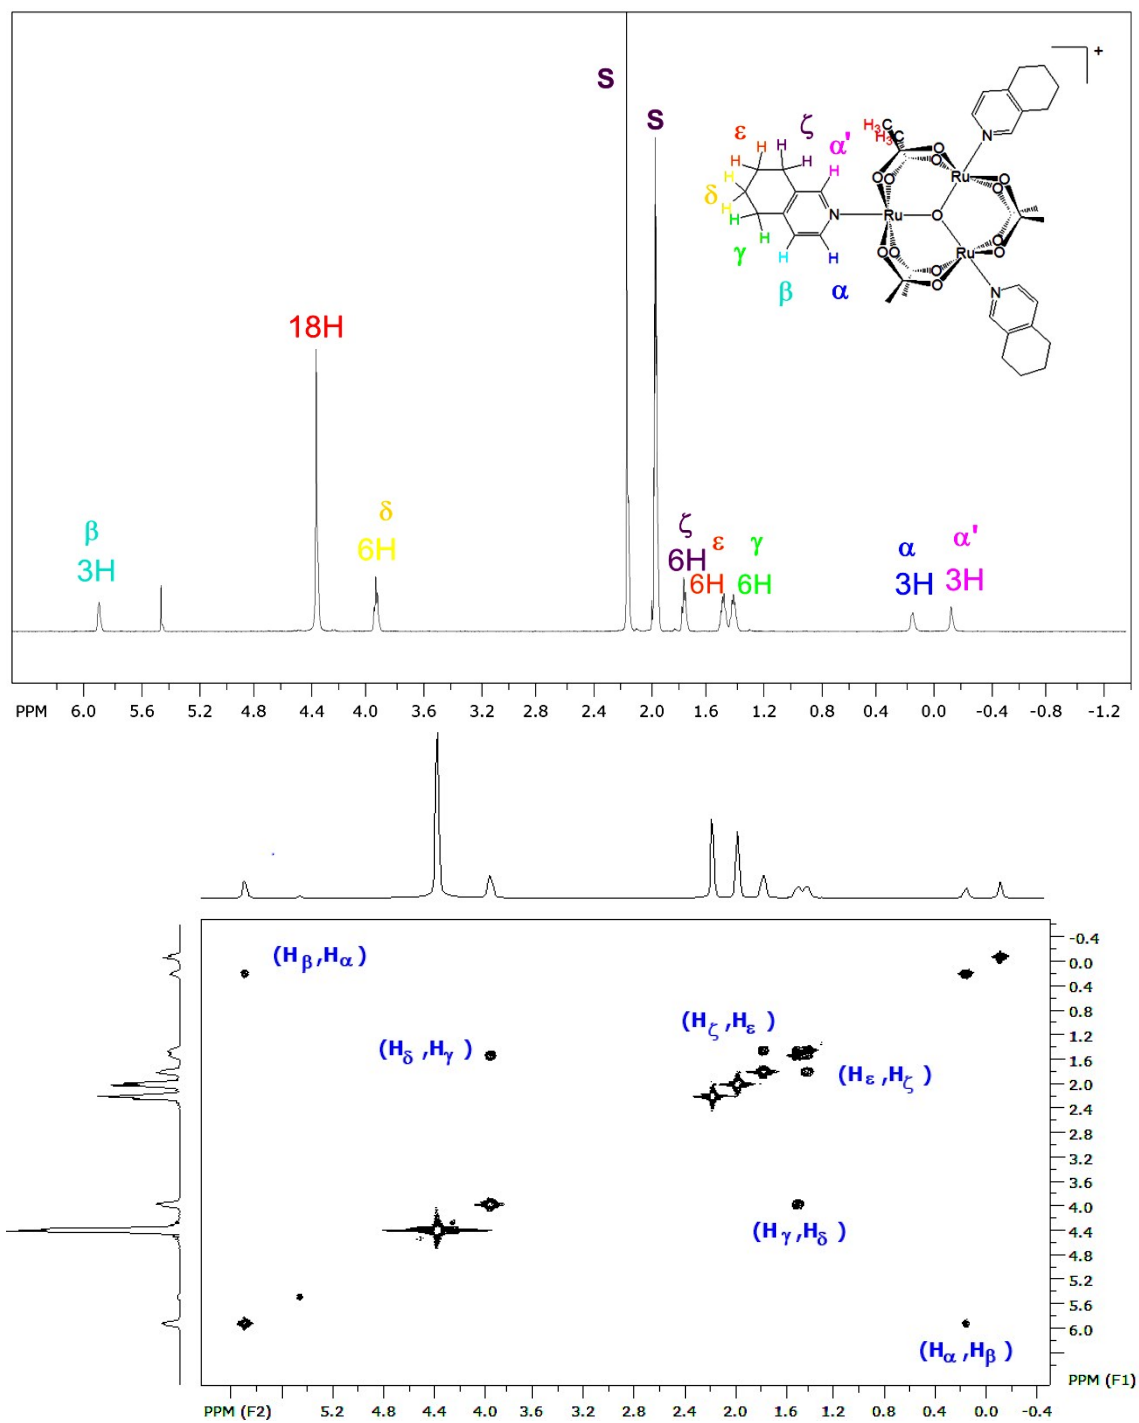

**Figure S16.**  $^1\text{H-NMR}$  and COSY spectra of complex **6**, obtained from a 10 mM acetonitrile- $\text{d}_3$  solution.

**Table S18.**  $^1\text{H}$  NMR chemical shifts ( $\delta$ ) and  $\Delta\delta$  observed for free ligands **1-6**. Data collected from Aldrich Library of  $^{13}\text{C}$  and  $^1\text{H}$  FT-NMR Spectra

| $\delta$ (ppm) (free ligands) |                |            |            |       |            |                   |
|-------------------------------|----------------|------------|------------|-------|------------|-------------------|
| Hydrogen                      | 1, qui         | 2, 5-nitro | 3, 5-briq* | 4, iq | 5, 5-amino | 6, THIQ           |
| $\alpha'$                     | 9.40           | 9.50       | 9.37       | 9.22  | 9.25       | 8.25              |
| $\alpha$                      | 9.35           | 8.75       | 8.66       | 8.48  | 8.40       | $\alpha=\alpha'$  |
| $\beta$                       | -              | 8.55       | 7.91       | 7.60  | 8.05       | 6.93              |
| $\gamma$                      | 8.05           | -          | -          | 7.90  | -          | 2.76              |
| $\delta$                      | 7.90           | 8.65       | 8.19       | 7.54  | 6.95       | 1.79              |
| $\epsilon$                    | 7.50           | 7.85       | 7.62       | 7.64  | 7.40       | $\epsilon=\delta$ |
| $\zeta$                       | $\delta=\zeta$ | 8.40       | 8.15       | 7.76  | 7.35       | $\zeta=\gamma$    |
| $\text{NH}_2$                 | -              | -          | -          | -     | 6.05       | -                 |
| $\Delta\delta$ (ppm)          |                |            |            |       |            |                   |
| Hydrogen                      | 1, qui         | 2, 5-nitro | 3, 5-briq* | 4, iq | 5, 5-amino | 6, THIQ           |
| $\alpha$                      | 6.28           | 7.9        | 7.69       | 7.76  | 7.79       | 8.28              |
| $\alpha'$                     | 7.85           | 8.26       | 8.40       | 8.5   | 8.94       | 8.41              |
| $\beta$                       | -              | 2.01       | 1.59       | 1.34  | 1.82       | 1.04              |
| $\gamma$                      | 0.76           | -          | -          | 0.65  | -          | 1.37              |
| $\delta$                      | 0.61           | 1.05       | 0.78       | 0.15  | 0.63       | -2.14             |
| $\epsilon$                    | 0.11           | 0.44       | 0.34       | 0.25  | 0.23       | 0.33              |
| $\zeta$                       | 0.09           | -0.02      | 0.36       | 0.19  | 1.03       | 1.02              |
| $\text{NH}_2$                 | -              | -          | -          | -     | 1.6        | -                 |

## UV-vis absorption spectroscopy

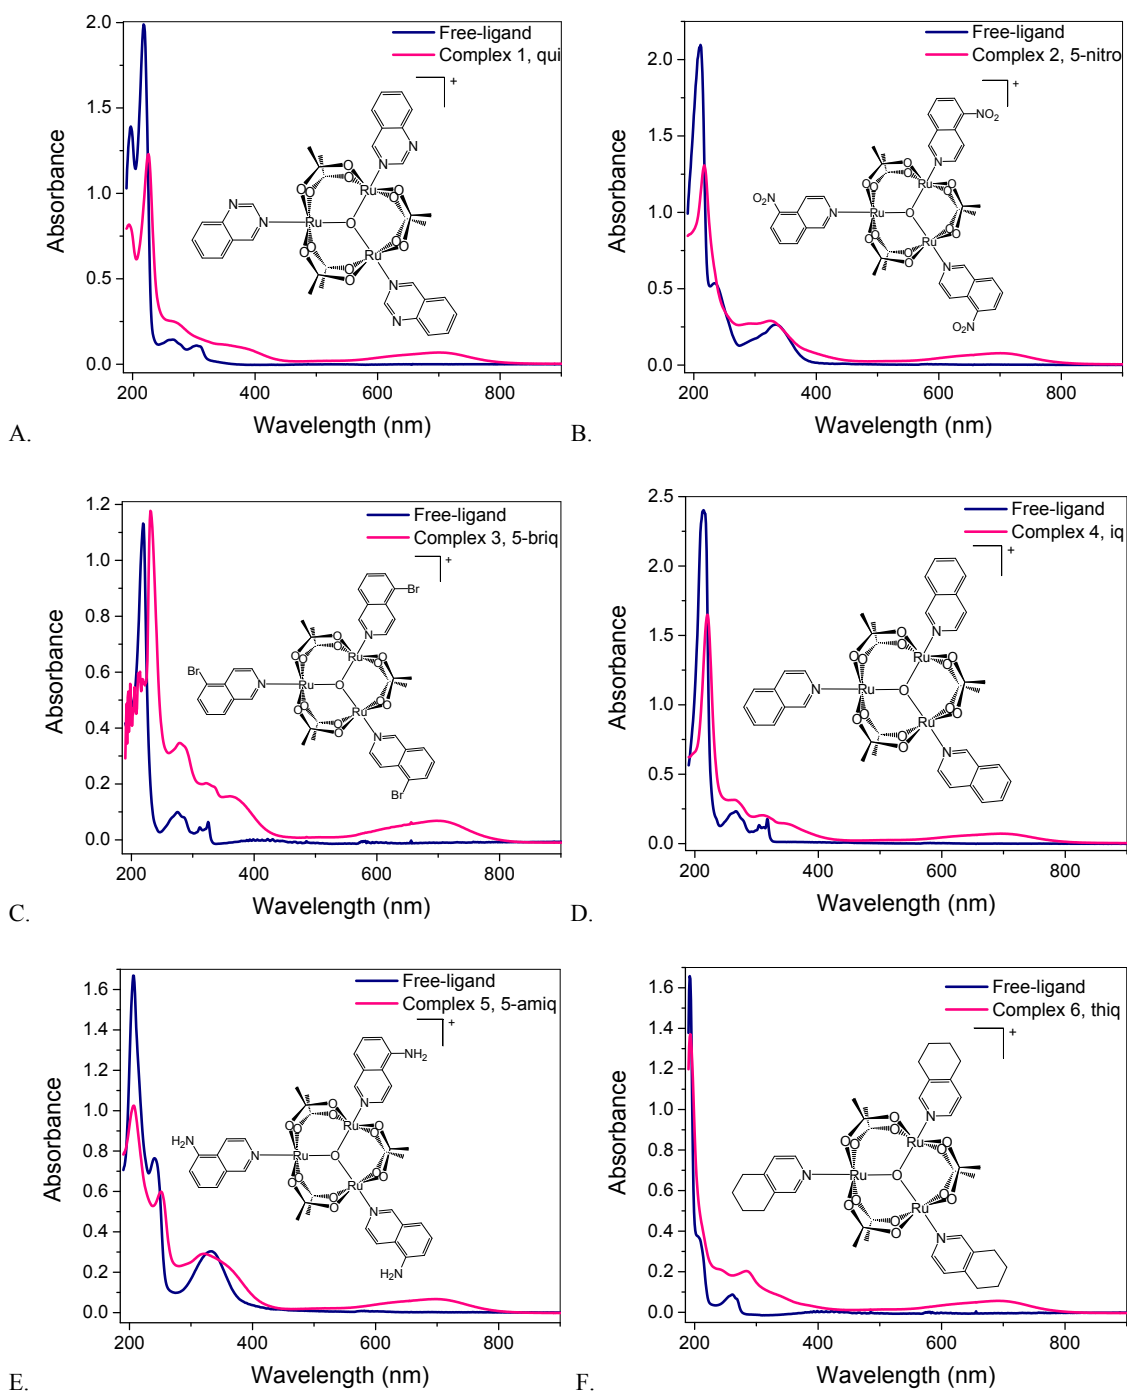

**Figure S17 A-F.** Absorption spectra complexes **1-6** ( $1 \times 10^{-5}$  mol L $^{-1}$ ) and the respective free ligands ( $5 \times 10^{-5}$  mol L $^{-1}$ ), collected from acetonitrile solutions.



## Infrared vibrational spectroscopy

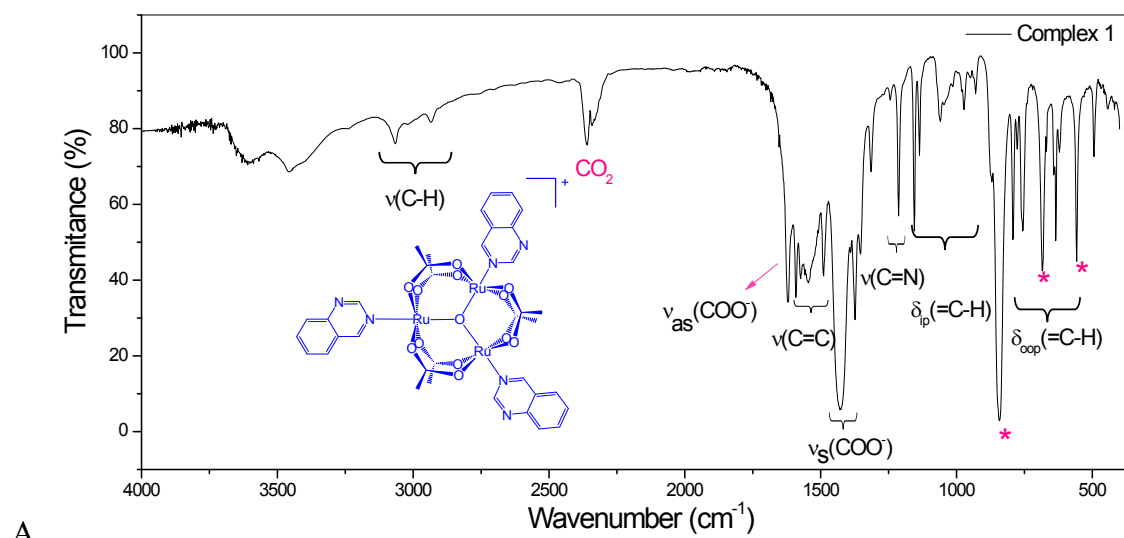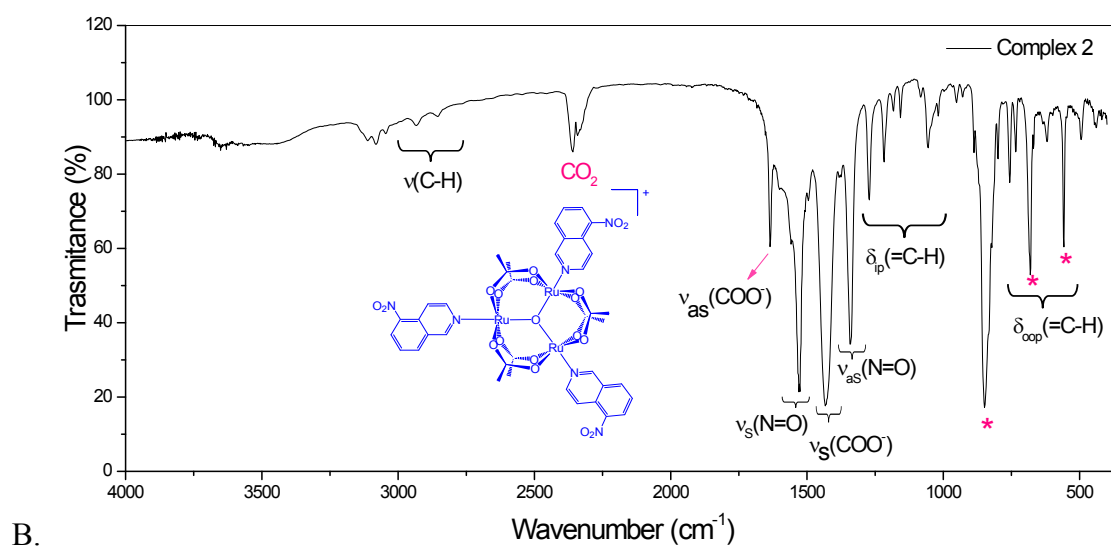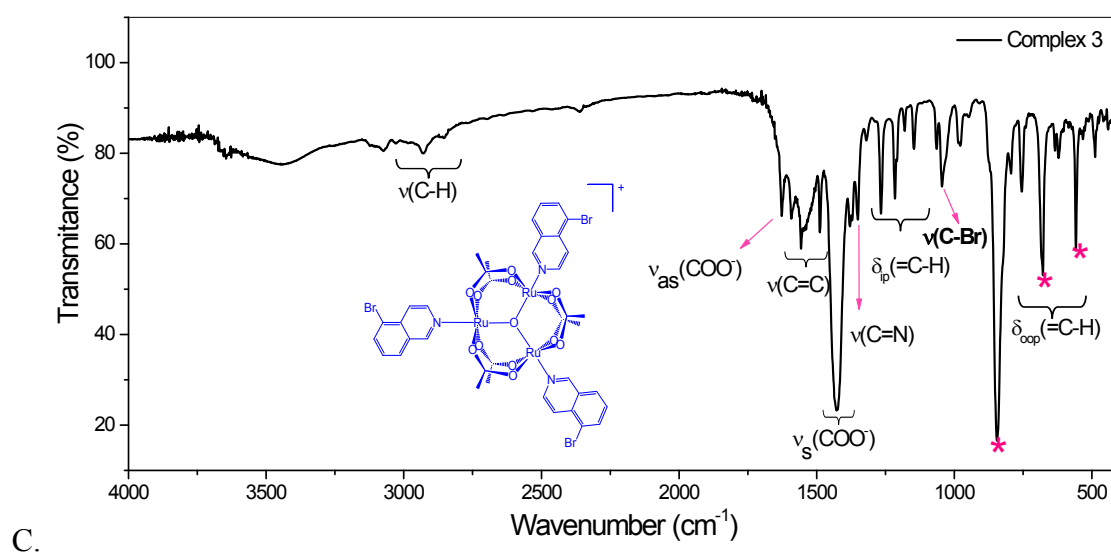

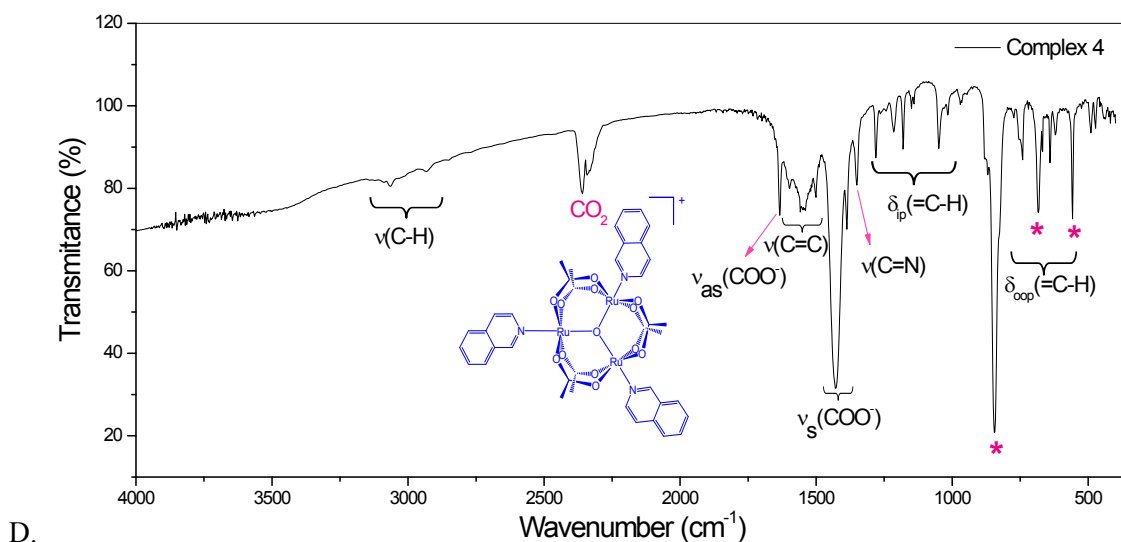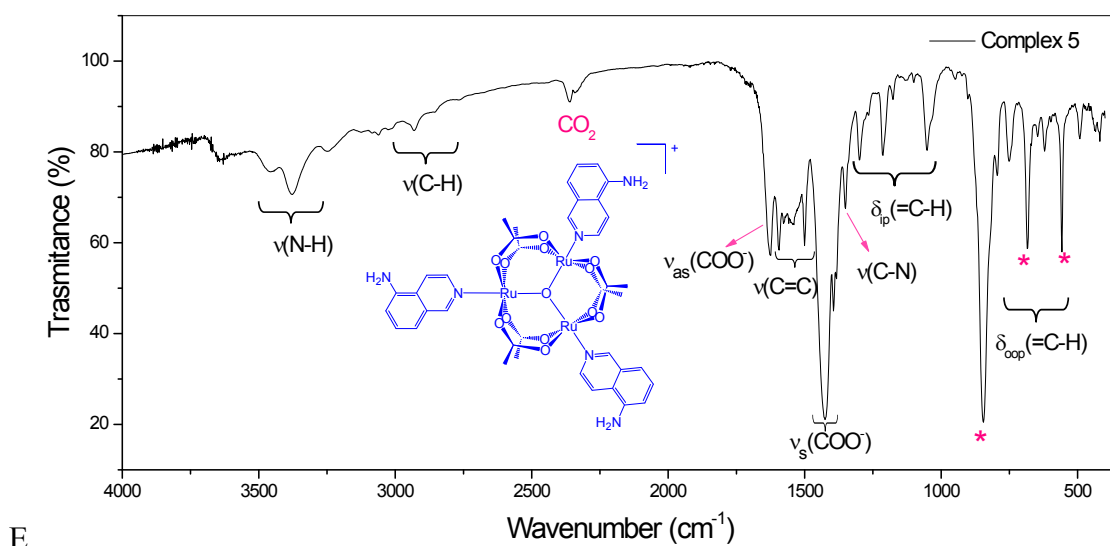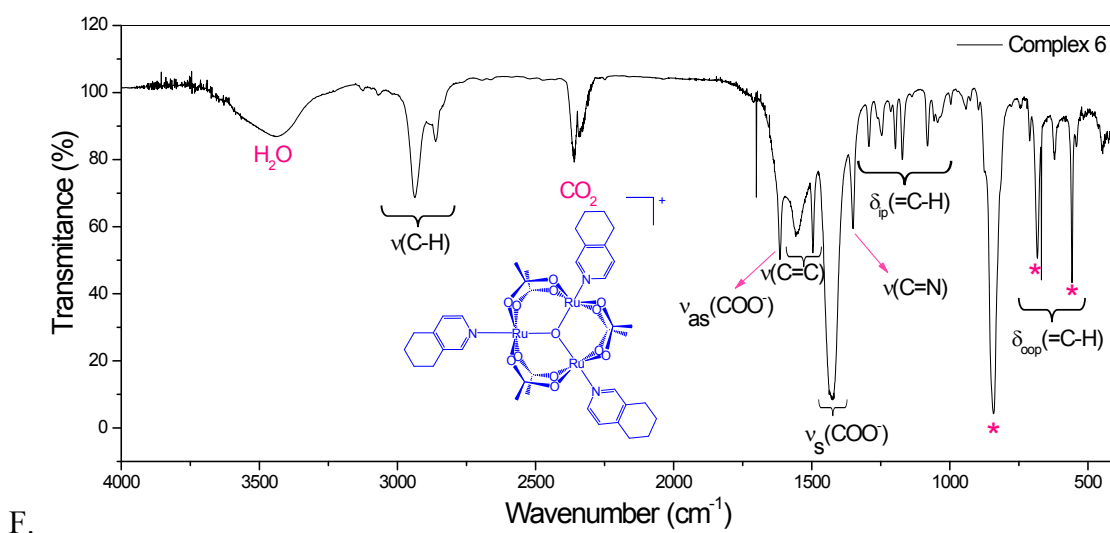

**Figure S18 A-F.** Infrared spectra of complexes **1 - 6** recorded from KBr pellets (the bands marked by \* correspond to  $\text{PF}_6^-$  vibrations).

**Table S19.** Tentative assignment of the main vibrational transitions observed in the IR spectra of complexes **1** to **6**, collected from KBr pellets.

| Complex      | Wavenumber (cm <sup>-1</sup> )    | Assignment                                                                   |
|--------------|-----------------------------------|------------------------------------------------------------------------------|
| (1), qui     | 1591m, 1556br and 1489m           | $\nu(\text{C}=\text{C})$ aromatic ring                                       |
|              | 1620m                             | $\nu_{\text{as}}(\text{COO}^-)$ from bridged acetate                         |
|              | 1427s                             | $\nu(\text{COO})$ from $\mu$ -acetate bridge                                 |
|              | 1216m                             | $\nu(\text{C}=\text{N})$ fused aromatic ring                                 |
|              | 790w, 752w, 685w, 635w            | $\delta_{\text{oop}}(\text{C}=\text{H})$ aromatic ring                       |
| (2), 5-nitro | 1635m                             | $\nu_{\text{as}}(\text{COO}^-)$ from bridged acetate                         |
|              | 1527s and 1341s                   | $\nu_{\text{s}}(\text{N}=\text{O})$ and $\nu_{\text{as}}(\text{N}=\text{O})$ |
|              | 1429s                             | $\nu_{\text{s}}(\text{COO})$ from $\mu$ -acetate bridge                      |
|              | 1271w, 1217w, 1182w               | $\delta_{\text{ip}}(\text{C}=\text{H})$ aromatic ring                        |
|              | 756w, 680w                        | $\delta_{\text{oop}}(\text{C}=\text{H})$ aromatic ring                       |
| (3), 5-briq  | 1592m, 1556br and 1488m           | $\nu(\text{C}=\text{C})$ aromatic ring                                       |
|              | 1628m                             | $\nu_{\text{as}}(\text{COO}^-)$ from bridged acetate                         |
|              | 1427s                             | $\nu(\text{COO})$ from $\mu$ -acetate bridge                                 |
|              | 1266m, 1215m, 1146w               | $\delta_{\text{ip}}(\text{C}=\text{H})$ aromatic ring                        |
|              | 1044m                             | $\nu(\text{C}-\text{Br})$ linked to aromatic ring                            |
|              | 758w, 620w, 487w                  | $\delta_{\text{oop}}(\text{C}=\text{H})$ aromatic ring                       |
| (4), iq      | 1598m, 1556br and 1501m           | $\nu(\text{C}=\text{C})$ aromatic ring                                       |
|              | 1633m                             | $\nu_{\text{as}}(\text{COO}^-)$ from bridged acetate                         |
|              | 1427s                             | $\nu_{\text{s}}(\text{COO})$ from $\mu$ -acetate bridge                      |
|              | 1274w, 1215w, 1180w               | $\delta_{\text{ip}}(\text{C}=\text{H})$ aromatic ring                        |
|              | 741w, 683w, 639w                  | $\delta_{\text{oop}}(\text{C}=\text{H})$ aromatic ring                       |
| (5), 5-amino | 3458w, 3377w                      | $\nu_{\text{s}}(\text{N}-\text{H})$ and $\nu_{\text{as}}(\text{N}-\text{H})$ |
|              | 2937w                             | $\nu(\text{C}-\text{H})$                                                     |
|              | 1594m, 1556br and 1500m           | $\nu(\text{C}=\text{C})$ aromatic ring                                       |
|              | 1626m                             | $\nu_{\text{as}}(\text{COO}^-)$ from bridged acetate                         |
|              | 1425s                             | $\nu_{\text{s}}(\text{COO}^-)$ from bridged acetate                          |
|              | 1298w, 1213w, 1176w               | $\delta_{\text{ip}}(\text{C}=\text{H})$ aromatic ring                        |
|              | 751w, 621w, 491w                  | $\delta_{\text{oop}}(\text{C}=\text{H})$ aromatic ring                       |
|              |                                   |                                                                              |
| (6), THIQ    | 2936m and 2862m                   | $\nu(\text{C}-\text{H})$                                                     |
|              | 1556br and 1496m                  | $\nu(\text{C}=\text{C})$ aromatic ring                                       |
|              | 1616m                             | $\nu_{\text{as}}(\text{COO}^-)$ from bridged acetate                         |
|              | 1427s                             | $\nu_{\text{s}}(\text{COO}^-)$ from bridged acetate                          |
|              | 1290w, 1244w, 1200w, 1170w, 1080w | $\delta_{\text{ip}}(\text{C}=\text{H})$ aromatic ring                        |
|              | 708w, 620w                        | $\delta_{\text{oop}}(\text{C}=\text{H})$ aromatic ring                       |
|              |                                   |                                                                              |

### Cyclic Voltammetry

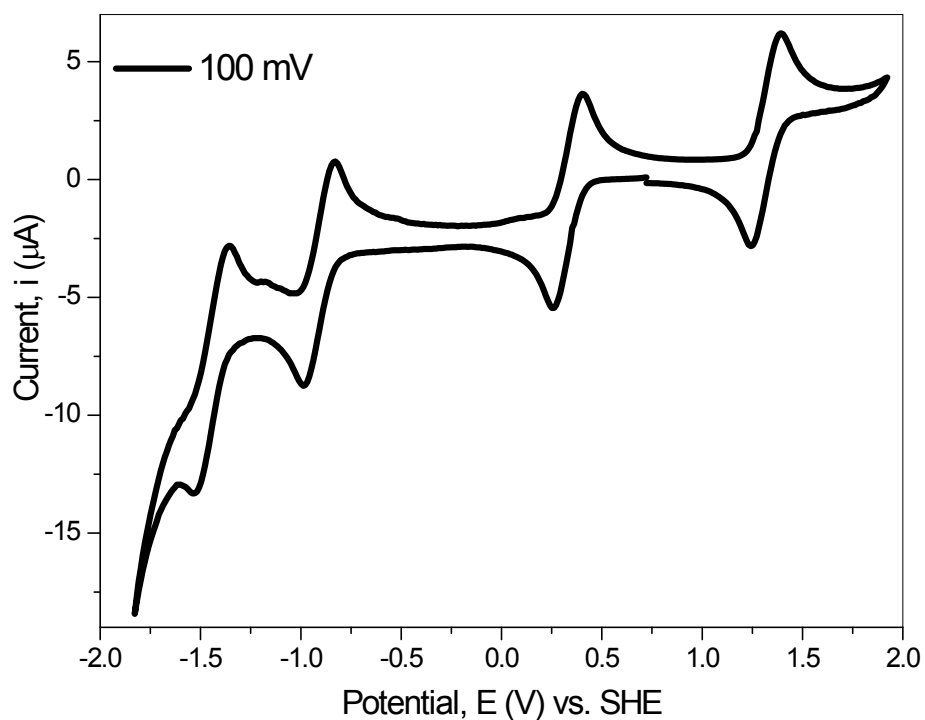

**Figure S19.** Cyclic voltammogram of **1**, [complex]= 0,001 mol L<sup>-1</sup>, [TBABF<sub>4</sub>]=0,1 mol L<sup>-1</sup> in benzonitrile.

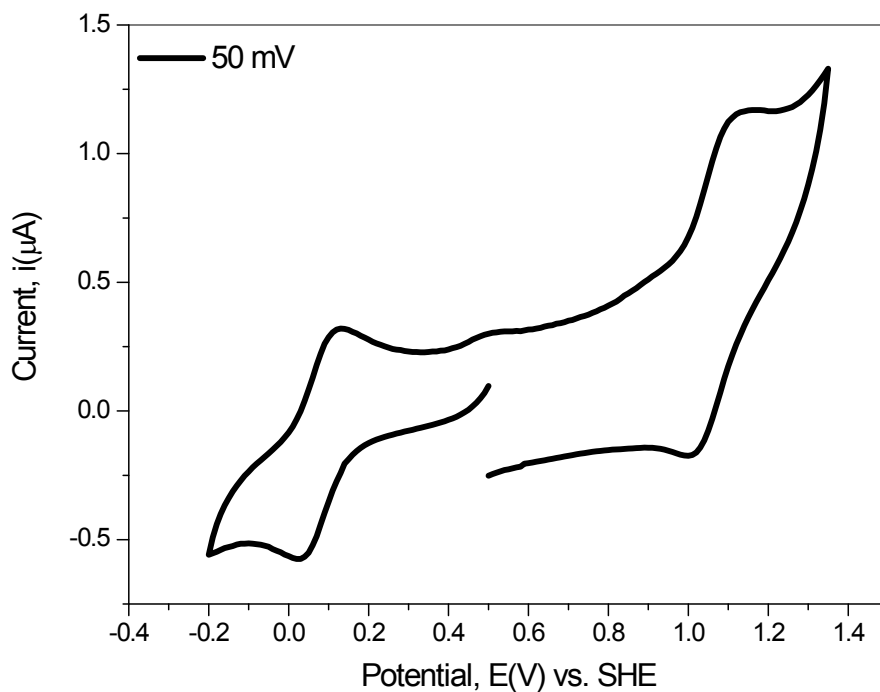

**Figure S20.** Cyclic voltammogram of complex **2**, [complex]= 0,0001 mol L<sup>-1</sup>, [TBABF<sub>4</sub>]=0,1 mol L<sup>-1</sup> in benzonitrile.

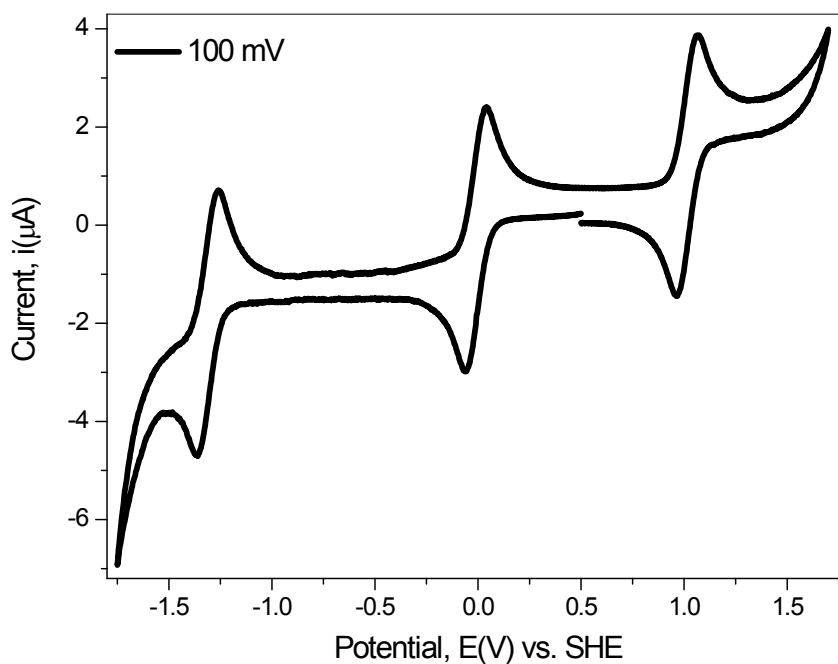

**Figure S21.** Cyclic voltammogram of complex **4**, [complex]= 0,001 mol L<sup>-1</sup>, [TBABF<sub>4</sub>]=0,1 mol L<sup>-1</sup> in benzonitrile.

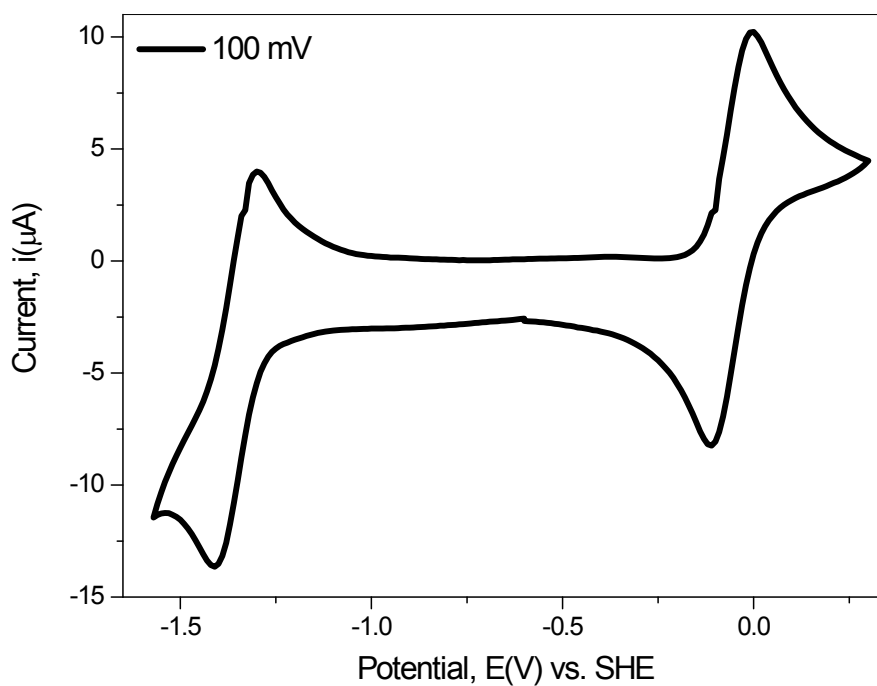

**Figure S22.** Cyclic voltammogram of complex **5** [complex]= 0,001 mol L<sup>-1</sup>, [TBABF<sub>4</sub>]= 0,1 mol L<sup>-1</sup> in benzonitrile.

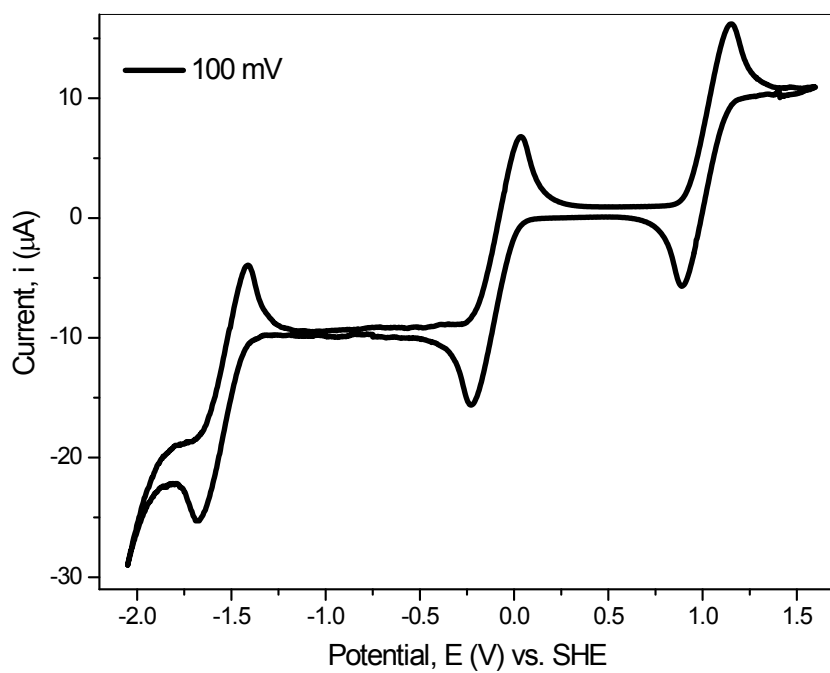

**Figure S23.** Cyclic voltammogram of complex **6** [complex]= 0,01 mol L<sup>-1</sup>, [TBABF<sub>4</sub>]= 0,1 mol L<sup>-1</sup> in benzonitrile.
